# Supplementary material for: Insights into the chiral sulfide/selenide-catalyzed electrophilic carbothiolation of alkynes: mechanism and origin of axial chirality
Source: Royal Society of Chemistry journal article supplement (doi:10.1039/d1qo00036e), 2021-01-01
Supplement: d1qo00036e1.pdf [file d1qo00036e1.pdf]

*Supporting Information*  
**Insights into Chiral Sulfide/Selenide Electrophilic  
Carbothiolation of Alkynes: Mechanism and Origin of  
Axial Chirality**

Qiao-Yu Zhang,<sup>a</sup> Shi-jun Li,<sup>a</sup> Yang Wang,<sup>b</sup> Jinshuai Song,<sup>a</sup> Yu Lan,<sup>a,\*</sup> Donghui Wei<sup>a,\*</sup>

<sup>a</sup> Green Catalysis Center, and College of Chemistry, Zhengzhou University, 100 Science Avenue, Zhengzhou, Henan 450001, China

<sup>b</sup> Department of Material and Chemical Engineering, Zhengzhou University of Light Industry, Zhengzhou 450002, China

E-mail: lanyu@cqu.edu.cn (Y. Lan); donghuiwei@zzu.edu.cn (D. Wei).

### Table of Contents

|                                                                                                                                               |    |
|-----------------------------------------------------------------------------------------------------------------------------------------------|----|
| <b>Part 1: Computational methods</b> .....                                                                                                    | 2  |
| <b>Part 2: Additionally computational results</b> .....                                                                                       | 4  |
| 2.1 Other unfavorable pathway for the formation of <b>Int1</b> .....                                                                          | 4  |
| 2.2 The role of chiral sulfide catalyst.....                                                                                                  | 4  |
| 2.3 Local electrophilic ( $P_k^+$ ) and nucleophilic ( $P_k^-$ ) Parr function analyses on <b>R1</b> , <b>Int1</b> , and <b>Int02</b> . ..... | 5  |
| 2.4 The formation of thiiranium ion intermediate catalyzed by chiral selenide catalyst.....                                                   | 6  |
| 2.5 NCI and AIM analyses of <b>TS2R-Se</b> and <b>TS2S-Se</b> .....                                                                           | 6  |
| 2.6 Different configurations of <b>TS2R&amp;TS2S</b> .....                                                                                    | 8  |
| 2.7 NCI and AIM analyses of <b>TS2R</b> and <b>TS2S</b> .....                                                                                 | 11 |
| 2.8 The FMO overlap mode and ELF analyses for the formation of thiiranium ion intermediate .....                                              | 12 |
| 2.9 The volume of R groups of <b>R2</b> involved in the axially chiral products .....                                                         | 12 |
| <b>Part 3: Energy values and Cartesian coordinates of all the optimized structures</b> .....                                                  | 15 |
| 3.1 Absolute SPE and GFE of the optimized structures by using B3LYP-D3 method.....                                                            | 15 |
| 3.2 Absolute SPE and GFE of the optimized structures by other DFT methods.....                                                                | 16 |
| 3.3 The Cartesian coordinates and representative vibrational frequencies of all the stationary points .....                                   | 18 |

\* Corresponding Author: donghuiwei@zzu.edu.cn (D. Wei)

\* Corresponding Author: lanyu@cqu.edu.cn (Y. Lan)

## Part 1: Computational methods

All theoretical calculations were performed in Gaussian 09<sup>1</sup>. All structures were completely optimized by using the B3LYP-D3<sup>2</sup> method and the 6-31G(d, p) basis set in dichloromethane solvent with the integral equation formalism polarizable continuum model (IEF-PCM)<sup>3</sup>. Frequency calculations were carried out at the same level to confirm all the optimized structures as minima (no imaginary frequency) or transition states (only one imaginary frequency), and provided the thermal relative Gibbs free energy correction.

All the energies discussed in the main text are the relative Gibbs free energies (GFE), which are obtained by the addition of the thermal Gibbs free energy corrections (GFEC) at the B3LYP-D3/6-31G(d, p)/IEF-PCM<sub>dichloromethane</sub> level and the single-point energies (SPE) at a higher computational level of B3LYP-D3/6-311++G(2df, 2pd)/IEF-PCM<sub>dichloromethane</sub>. To check whether the selected method is reliable, the additional calculations by employing different DFT methods (including M06-2X<sup>4</sup>/6-31G(d, p)/IEF-PCM<sub>dichloromethane</sub> and  $\omega$ B97X-D<sup>5</sup>/6-31G(d, p)/IEF-PCM<sub>dichloromethane</sub> have been performed for the key transition states involved in the stereoselectivity-determining step, and the computed and test results can be found in the **Table S1**. As summarized in **Table S1**, there are tiny differences between the energies calculated by different methods. Thus, the selected DFT method is suitable in this work.

**Table S1.** The relative Gibbs free energies (kcal/mol) of transition states **TS2R&TS2S** calculated by the three calculation methods below.

| Method      | B3LYP-D3 | M06-2X | $\omega$ B97XD |
|-------------|----------|--------|----------------|
| <b>TS2R</b> | 2.2      | 2.0    | 2.1            |
| <b>TS2S</b> | 0        | 0      | 0              |

We further computed the single-point energies for the key transition states **TS2R&TS2S** optimized at the B3LYP-D3/6-31G(d, p)/IEF-PCM<sub>dichloromethane</sub> level by

using the higher basis set 6-311++G(2df, 2pd). As summarized in **Table S2**, the single-point energies of transition states **TS2R&TS2S** calculated by 6-311++G(2df, 2pd) basis set are close to those obtained by the selected basis set 6-31G(d, p). Thus, the calculated results should be reliable and the selected basis set is suitable for the study in this work.

**Table S2.** The relative energies (kcal/mol) of transition states **TS2R&TS2S** calculated by two different basis sets including 6-31G(d, p) and 6-311++G(2df, 2pd).

| Basis Set   | 6-31G(d, p) | 6-311++G(2df,2pd) |
|-------------|-------------|-------------------|
| <b>TS2R</b> | 1.6         | 2.2               |
| <b>TS2S</b> | 0.0         | 0.0               |

Noncovalent interactions (NCIs) and atom-in-molecule (AIM)<sup>6</sup> analyses were plotted using NCIPLOT (version 1.0)<sup>7</sup> and Multiwfn (version 3.3.8)<sup>8</sup>. Most of the significant three-dimensional structures were illustrated with CYLview<sup>9</sup>. In addition, the extent of enantioselectivity, in terms of enantiomeric excess (*ee*), was calculated by using the Boltzmann distribution of diastereomeric transition states with the following equations:

$$eq. 1: \frac{[S]}{[R]} = \frac{\exp\left(-\Delta G_{[S]}^{\ddagger}/RT\right)}{\exp\left(-\Delta G_{[R]}^{\ddagger}/RT\right)} = \exp\left(\Delta\Delta G_{[R]-[S]}^{\ddagger}/RT\right)$$

$$eq. 2: ee = \frac{[S] - [R]}{[S] + [R]} \times 100\% = \frac{\frac{[S]}{[R]} - 1}{\frac{[S]}{[R]} + 1} \times 100\%$$

where  $\Delta G^{\ddagger}$  is the Gibbs free energy barrier of the competing diastereomeric transition state and  $\Delta\Delta G^{\ddagger}$  is the difference between the Gibbs free energy barriers of two diastereomeric transition states.

## Part 2: Additionally computational results

### 2.1 Other unfavorable pathway for the formation of Int1

In addition, we considered and discussed other possible pathways to activate the electrophilic sulfur reagent. As shown in **Fig. S1**, the reactant **R1** and Lewis acid **TMSOTf** were proposed to be transformed to 1-(trimethylsilyl)pyrrolidine-2,5-dione (donated as **P1**) and *P*-methylphenylthiotrifluoromethanesulfonic acid (donated as **P2**). Then, the **Cat** nucleophilically attacks on the S atom of **P2** to form **Int1** via a  $S_N2$  type transition state **TS1'** with an energy barrier of 31.0 kcal/mol, showing that this pathway is difficult to happen under the experimental conditions.

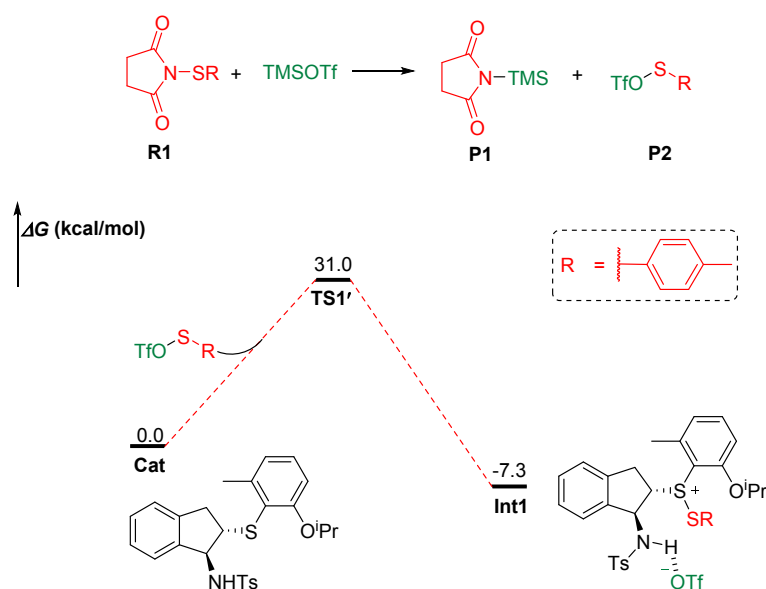

**Fig. S1.** The relative Gibbs free energy profiles of transformation from **Cat** and **P2** to **Int1**.

### 2.2 The role of chiral sulfide catalyst

In order to understand the actual role of chiral sulfide, we analyzed global reaction index (GRI)<sup>10</sup>. The global electrophilicity index  $\omega$  is calculated from the electronic chemical potential  $\mu$  and the chemical hardness  $\eta$  with the equation  $\omega = (\mu^2/2\eta)$ , which can be computed by using the energies of the frontier molecular orbitals (HOMO and LUMO), *i.e.*  $E_H$  and  $E_L$ , respectively, and the equations are  $\mu \approx (E_H + E_L)/2$  and  $\eta \approx (E_L - E_H)$ . According to the HOMO energies obtained within the Kohn–Sham<sup>11</sup> scheme,

Domingo<sup>12</sup> and co-workers defined a global nucleophilicity index  $N$  ( $N = E_{\text{HOMO(S)}} - E_{\text{HOMO(TCE)}}$ ) to handle the nucleophilicity scale. As shown in **Table S3**, the electrophilicity index ( $\omega$ ) of the reactant **R1** (1.33 eV) is enhanced to 2.93 eV in intermediate **Int1** after the complexation with the catalyst. The computed results show that the catalyst can strengthen the electrophilicity of **R1** to promote the subsequent reaction with the nucleophile acetylide.

**Table S3.** GRI analysis of **R1**, **Int1**, and **Int02**

| SP           | $E_{\text{HOMO}}$ (a.u.) | $E_{\text{LUMO}}$ (a.u.) | $\eta$ (a.u.) | $\mu$ (a.u.) | $\omega$ (eV) | $N$ (eV) |
|--------------|--------------------------|--------------------------|---------------|--------------|---------------|----------|
| <b>R1</b>    | -0.250                   | -0.038                   | -0.144        | 0.212        | 1.33          | 2.01     |
| <b>Int1</b>  | -0.242                   | -0.103                   | -0.173        | 0.139        | 2.93          | 2.21     |
| <b>Int02</b> | -0.225                   | -0.102                   | -0.163        | 0.123        | 2.96          | 2.69     |

### 2.3 Local electrophilic ( $P_k^+$ ) and nucleophilic ( $P_k^-$ ) Parr function analyses on **R1**, **Int1**, and **Int02**.

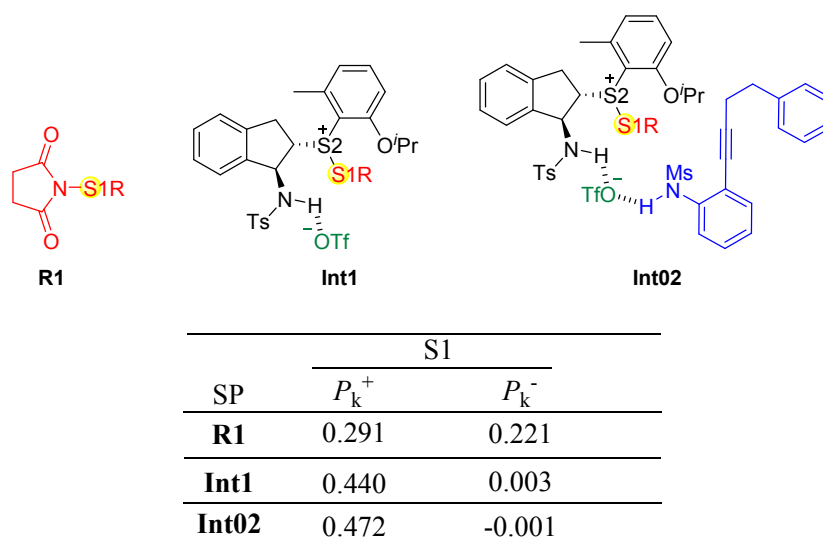

**Fig. S2.** Local electrophilic ( $P_k^+$ ) and nucleophilic ( $P_k^-$ ) Parr function analyses on **R1**, **Int1**, and **Int02**.

## 2.4 The formation of thiiranium ion intermediate catalyzed by chiral selenide catalyst

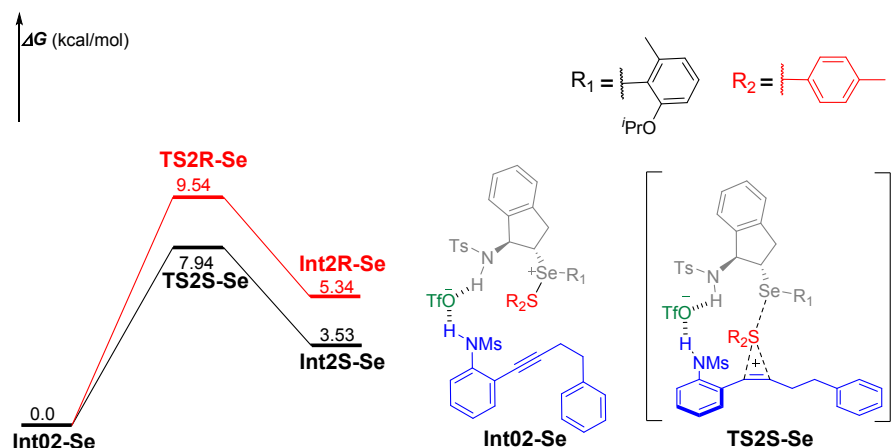

**Fig. S3.** The relative Gibbs free energy profiles of the chiral selenide-catalyzed electrophilic carbothiolation reaction of alkyne.

## 2.5 NCI and AIM analyses of TS2R-Se and TS2S-Se

As shown in **Scheme S1**, the relatively low stereoselectivity (85% *ee*) was obtained by using selenide catalyst in experiment<sup>13</sup>. Herein, we also computed the formation process of thiiranium ion intermediate with the presence of selenide catalyst. As summarized in **Fig. 2** and **S3**, the energy difference between **TS2R-Se** and **TS2S-Se** is only 1.6 kcal/mol, which is smaller than the energy difference between **TS2R** and **TS2S** (2.2 kcal/mol). Attracted by this puzzle, the topology analyses on the key transition states **TS2R-Se** and **TS2S-Se** was performed to characterize the stereoselectivity-determining factors by using noncovalent interaction (NCI) and Bader's atoms-in-molecules (AIM) methods. As shown in **Fig. S4**, the NCI analyses of the transition states **TS2R-Se** and **TS2S-Se** indicate that the hydrogen bond N-H...O interactions would be the key for determining the stereoselectivity. Correspondingly, Laplacian values at the bond critical points (BCPs) along the bond paths were summarized in **Fig. S4c**. The quantitatively analysis results indicate that there are more and stronger hydrogen bond C-H...O interactions in **TS2S-Se** compared with those in the other transition state.

Hence, the C-H...O hydrogen bond interactions would lead to the energetical favorability of *SR* configurational transition state **TS2S-Se**, which is the key to control the stereoselectivity. By comparing **Fig. 2** and **Fig. S4**, the energy difference between **TS2R-Se** and **TS2S-Se** is relatively smaller and the lower *ee* value is obtained by using selenide catalyst, which is mainly because that the strength of the <sup>1</sup>N-H...O interaction in **TS2R-Se** becomes stronger than that in **TS2R**.

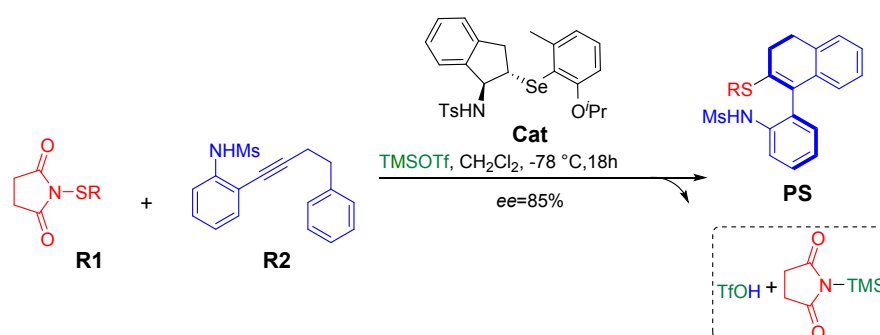

**Scheme. S1** Representative strategies for the organocatalytic preparation of axially chiral compounds using alkynes.

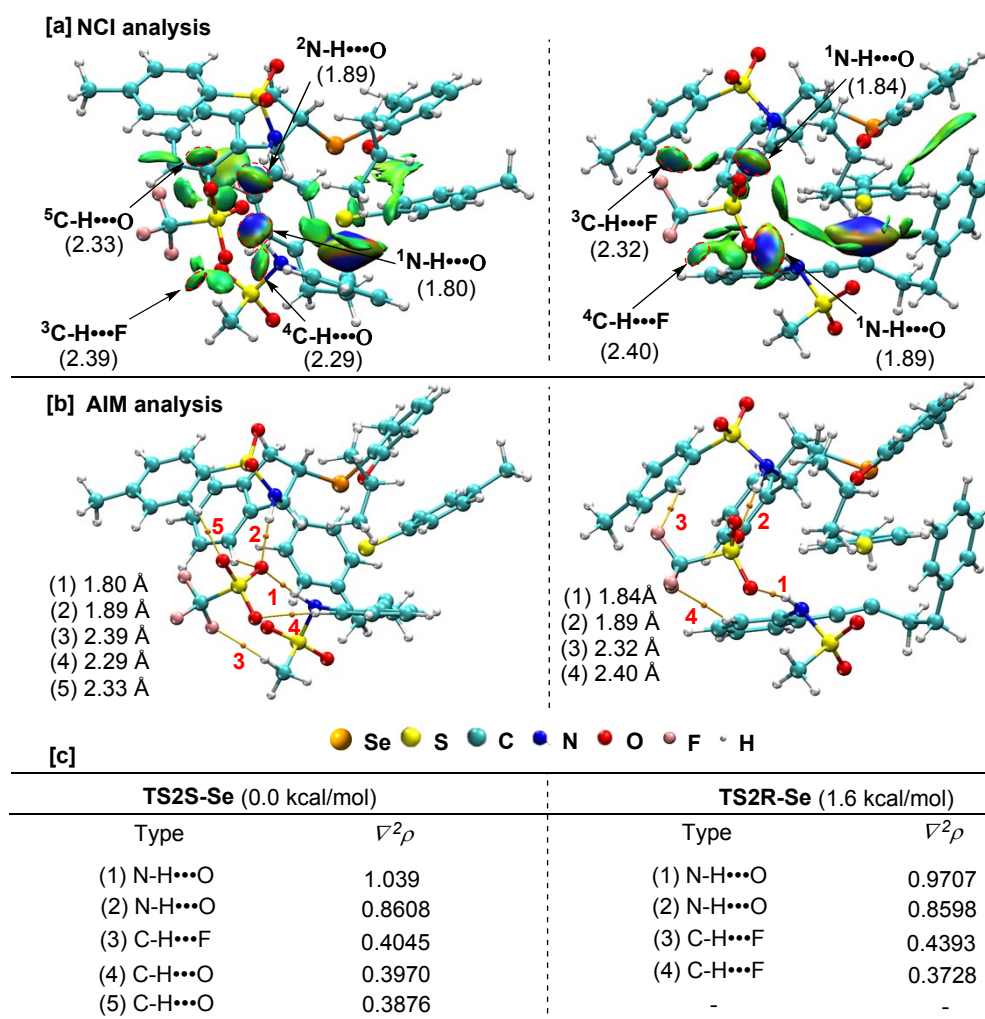

**Fig. S4** (a) NCI and (b) AIM analyses of the transition states **TS2S-Se** and **TS2R-Se** (Distance in Å) and (c) summary of Laplacian values ( $\nabla^2\rho$ , eÅ<sup>-3</sup>).

## 2.6 Different configurations of **TS2R**&**TS2S**

To ensure the selected configuration of the stereochemical transition state **TS2R**&**TS2S** with the lowest energy, we have searched multiple possible conformations in the second step. By rotating the dihedral angle  $\Phi_1(\text{C1-S2-C3-C4})$  and dihedral angle  $\Phi_2(\text{C1-S2-S5-C6})$  in stereo-controlling transition states **TS2S** and **TS2R**, we have totally constructed  $2 \times 9 = 18$  conformations as the initial structures, which have subsequently been optimized at the B3LYP-D3/6-31G(d, p)//IEFPCM<sub>dichloromethane</sub> level. Actually, we have only obtained ten conformations after optimization. As depicted in **Fig. S5**, we have located ten diastereoselective transition states, and selected the two lowest energy



conformations (denoted as **TS2S** and **TS2R**) with the dihedral angles  $\Phi_1(\text{C1-S2-C3-C4})$  of  $101^\circ/-96^\circ$  and the dihedral angles  $\Phi_2(\text{C1-S2-S5-C6})$  of  $-31^\circ/-143^\circ$ , separately.

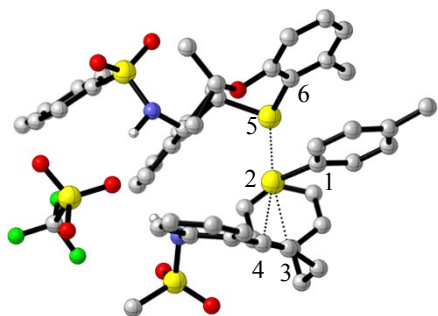

TS2S $\Phi_1 = 101^\circ/\Phi_2 = -31^\circ$  0.0

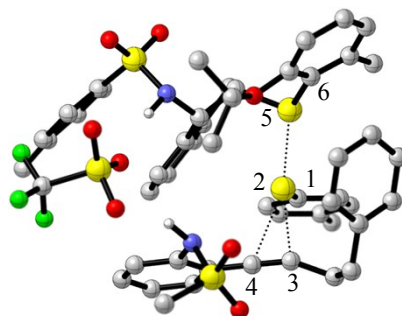

TS2R $\Phi_1 = -96^\circ/\Phi_2 = -143^\circ$  1.6

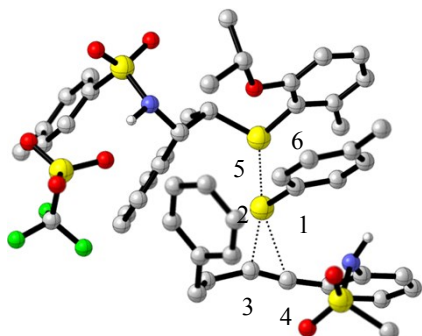

TS2S $\Phi_1 = -60^\circ/\Phi_2 = 9^\circ$  15.4

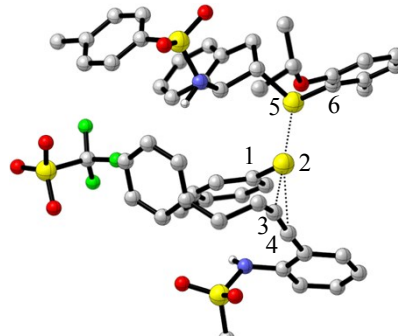

TS2R $\Phi_1 = 66^\circ/\Phi_2 = -165^\circ$  17.4

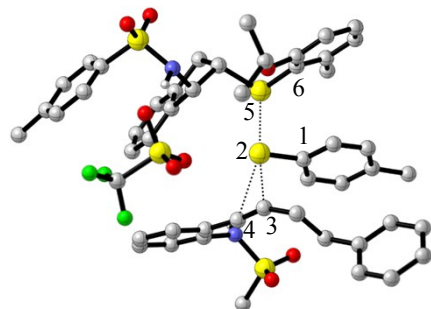

TS2S $\Phi_1 = -118^\circ/\Phi_2 = -62^\circ$  11.1

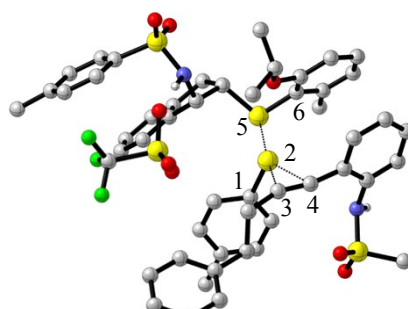

TS2R $\Phi_1 = 120^\circ/\Phi_2 = -146^\circ$  12.3

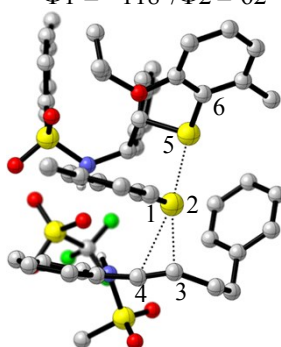

TS2S $\Phi_1 = 57^\circ/\Phi_2 = 48^\circ$  13.2

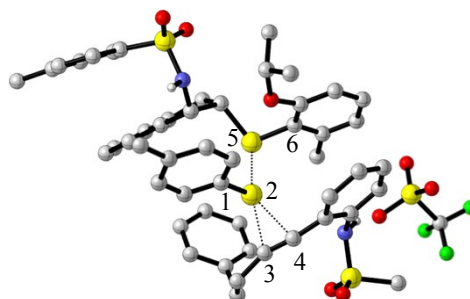

TS2R $\Phi_1 = -84^\circ/\Phi_2 = -35^\circ$  35.56

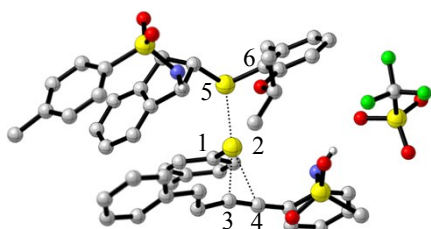

TS2S $\Phi_1 = 92^\circ/\Phi_2 = -134^\circ$  3.5

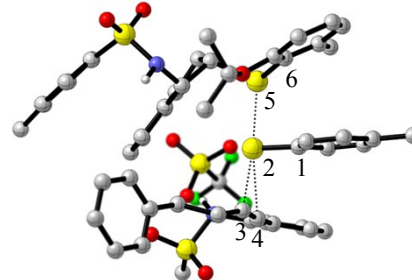

TS2R $\Phi_1 = -102^\circ/\Phi_2 = 106^\circ$  16.0

**Fig. S5.** Different configurations of the transition states **TS2Rs** and **TS2Ss** with different dihedral  $\Phi_1$  and  $\Phi_2$  angles optimized at the B3LYP-D3/6-31G(d, p)/IEF-PCM<sub>dichloromethane</sub> level of theory (energy in kcal/mol)

### 2.7 NCI and AIM analyses of **TS2R** and **TS2S**

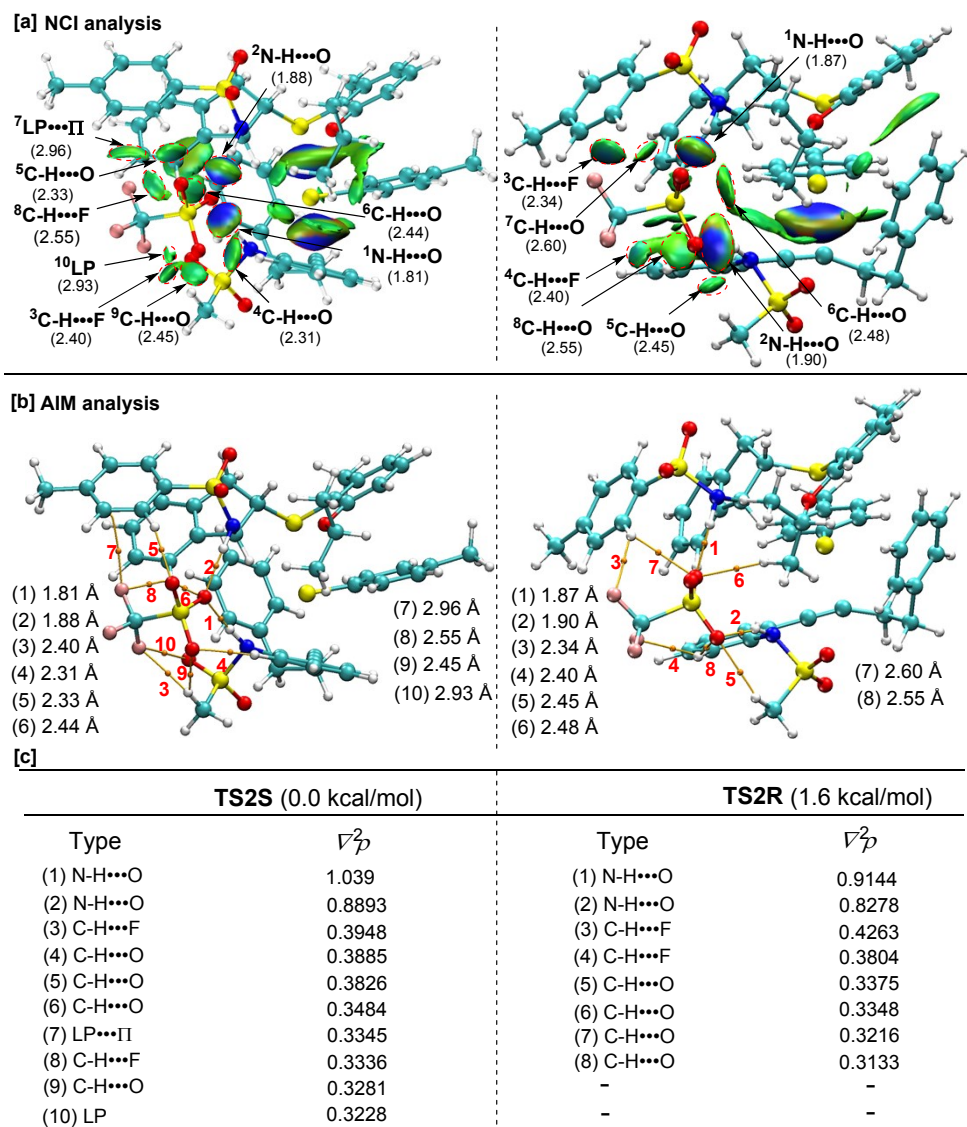

**Fig. S6** (a) NCI and (b) AIM analyses of the transition states **TS2S** and **TS2R** (Distance in Å), and (c) complete summary of Laplacian values ( $\nabla^2\rho$ , eÅ<sup>-3</sup>).

## 2.8 The FMO overlap mode and ELF analyses for the formation of thiiranium ion intermediate

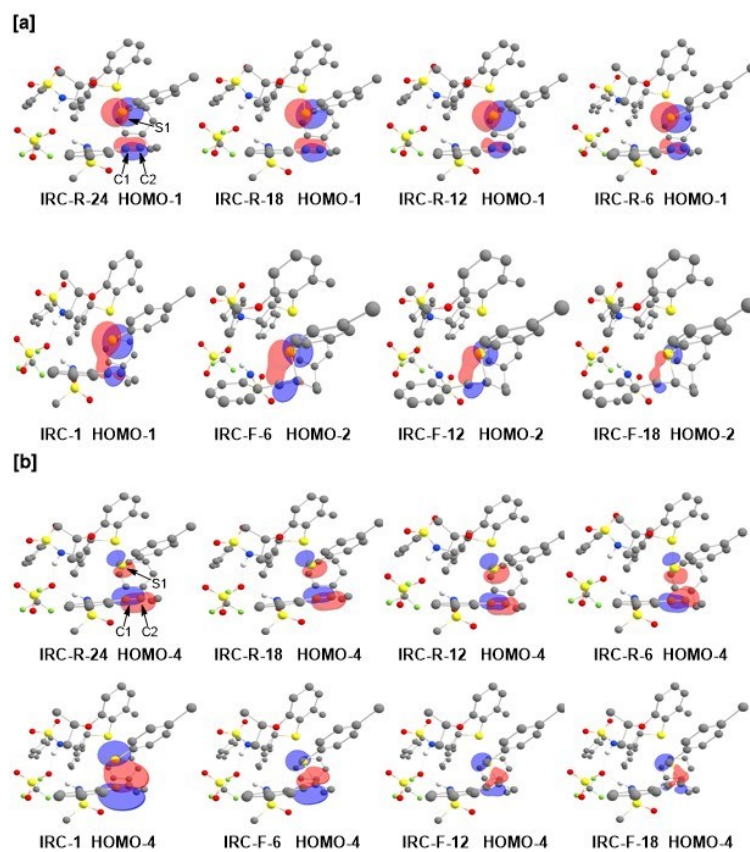

**Fig. S7** The orbital pictures for (a) S1-C1 and (b) S1-C2  $\sigma$  bonds of several representative IRC points of **TS2S** (IRC-1 is the structure of transition state, F represents forward direction, R represents reverse direction, and only the orbital pictures of the key atoms (S1, C1, and C2 atoms) are shown).

## 2.9 The volume of R groups of R2 involved in the axially chiral products

To obtain the relationship of substituent groups and the energy barriers of corresponding racemization between the enantioselective products, the typical functional groups, *i.e.* H, CH<sub>3</sub>, *t*Pr, and *p*-methylphenylthio (PMP) group, were employed for molecular simulations. The molecular volume of organic compounds has good additivity, that is, the molecular volume of organic compounds is equal to the sum of the topological volumes of the functional groups of its components, and the

molecular volume of organic compounds can be calculated by the following equation (eq. 3)<sup>14</sup>, in which  $V_m$  is the molecular volume,  $d$  is molecular radius.

$$\text{eq. 3: } V_M = \frac{M(\text{molecular weight})}{d \times 6.023 \times 10^{23}} = \frac{1.6603M}{d}$$

**Table S4.** Summary of the volumes of each groups.

| Groups          | Volume (cm <sup>3</sup> /mol) |
|-----------------|-------------------------------|
| H               | 9.8                           |
| CH <sub>3</sub> | 22.8                          |
| <sup>i</sup> Pr | 50.5                          |
| PMP             | 102.1                         |

## References

1. M. J. Frisch, G. W. Trucks, H. B. Schlegel, G. E. Scuseria, M. A. Robb, J. R. Cheeseman, G. Scalmani, V. Barone, G. A. Petersson, H. Nakatsuji, X. Li, M. Caricato, A. V. Marenich, J. Bloino, B. G. Janesko, R. Gomperts, B. Mennucci, H. P. Hratchian, J. V. Ortiz, A. F. Izmaylov, J. L. Sonnenberg, Williams, F. Ding, F. Lipparini, F. Egidi, J. Goings, B. Peng, A. Petrone, T. Henderson, D. Ranasinghe, V. G. Zakrzewski, J. Gao, N. Rega, G. Zheng, W. Liang, M. Hada, M. Ehara, K. Toyota, R. Fukuda, J. Hasegawa, M. Ishida, T. Nakajima, Y. Honda, O. Kitao, H. Nakai, T. Vreven, K. Throssell, J. A. Montgomery Jr., J. E. Peralta, F. Ogliaro, M. J. Bearpark, J. J. Heyd, E. N. Brothers, K. N. Kudin, V. N. Staroverov, T. A. Keith, R. Kobayashi, J. Normand, K. Raghavachari, A. P. Rendell, J. C. Burant, S. S. Iyengar, J. Tomasi, M. Cossi, J. M. Millam, M. Klene, C. Adamo, R. Cammi, J. W. Ochterski, R. L. Martin, K. Morokuma, O. Farkas, J. B. Foresman and D. J. Fox, Gaussian 09 Rev. C.01, Gaussian, Inc, Wallingford, CT, 2010.
2. C. Lee, W. Yang and R. G. Parr, Development of the Colle-Salvetti correlation-energy formula into a functional of the electron density, *Phys. Rev. B*, 1988, **37**, 785-789.
3. V. Barone and M. Cossi, Quantum Calculation of Molecular Energies and Energy Gradients in Solution by a Conductor Solvent Model, *J. Phys. Chem. A*, 1998, **102**, 1995-2001.
4. Y. Zhao and D. G. Truhlar, The M06 suite of density functionals for main group thermochemistry, thermochemical kinetics, noncovalent interactions, excited states, and transition elements: two new functionals and systematic testing of four M06-class functionals and 12 other functionals, *Theor. Chem. Acc.*, 2008, **120**, 215-241.
5. J.-D. Chai and M. Head-Gordon, Long-range corrected hybrid density functionals with damped atom-atom dispersion corrections, *Phys. Chem. Chem. Phys.*, 2008, **10**, 6615-6620.
6. R. F. W. Bader, A quantum theory of molecular structure and its applications, *Chem. Rev.*, 1991,

- 91**, 893-928.
7. (a) J. Contreras-García, E. R. Johnson, S. Keinan, R. Chaudret, J.-P. Piquemal, D. N. Beratan and W. Yang, NCIPLOT: A Program for Plotting Noncovalent Interaction Regions, *J. Org. Chem.*, 2011, **7**, 625-632; (b) E. R. Johnson, S. Keinan, P. Mori-Sánchez, J. Contreras-García, A. J. Cohen and W. Yang, Revealing Noncovalent Interactions, *J. Am. Chem. Soc.*, 2010, **132**, 6498-6506.
  8. T. Lu and F. Chen, Multiwfn: A multifunctional wavefunction analyzer, *J. Comput. Chem.*, 2012, **33**, 580-592.
  9. Legault, C. Y. Université de Sherbrooke, 2009, <http://www.cylview.org>.
  10. (a) R. G. Parr and R. G. Pearson, Absolute hardness: companion parameter to absolute electronegativity, *J. Am. Chem. Soc.*, 1983, **105**, 7512-7516; (b) W. Kohn and L. J. Sham, Self-Consistent Equations Including Exchange and Correlation Effects, *Phys. Rev.*, 1965, **140**, A1133-A1138; (c) L. R. Domingo, E. Chamorro and P. Pérez, An Analysis of the Regioselectivity of 1,3-Dipolar Cycloaddition Reactions of Benzonitrile N-Oxides Based on Global and Local Electrophilicity and Nucleophilicity Indices, *Eur. J. Org. Chem.*, 2009, **2009**, 3036-3044.
  11. L. J. Sham and W. Kohn, One-Particle Properties of an Inhomogeneous Interacting Electron Gas, *Phys. Rev.*, 1966, **145**, 561-567.
  12. (a) L. R. Domingo, E. Chamorro and P. Pérez, An Analysis of the Regioselectivity of 1,3-Dipolar Cycloaddition Reactions of Benzonitrile N-Oxides Based on Global and Local Electrophilicity and Nucleophilicity Indices, *Eur. J. Org. Chem.*, 2009, **2009**, 3036-3044; (b) L. R. Domingo, E. Chamorro and P. Pérez, An Understanding of the Electrophilic/Nucleophilic Behavior of Electro-Deficient 2,3-Disubstituted 1,3-Butadienes in Polar Diels–Alder Reactions. A Density Functional Theory Study, *J. Phys. Chem. A*, 2008, **112**, 4046-4053; (c) L. R. Domingo, P. Pérez and J. A. Sáez, Understanding the local reactivity in polar organic reactions through electrophilic and nucleophilic Parr functions, *RSC Adv.*, 2013, **3**, 1486-1494.
  13. Y. Liang, J. Ji, X. Zhang, Q. Jiang, J. Luo and X. Zhao, Enantioselective Construction of Axially Chiral Amino Sulfide Vinyl Arenes by Chiral Sulfide-Catalyzed Electrophilic Carbothiolation of Alkynes, *Angew. Chem. Int. Ed.*, 2020, **59**, 4959-4964.
  14. D. Qi, *Acta Sedimentologica Sinica*, 1993, **1**, 1-11.

## Part 3: Energy values and Cartesian coordinates of all the optimized structures

### 3.1 Absolute SPE and GFE of the optimized structures by using B3LYP-D3 method

|               | <b>SPE (a.u.)</b> | <b>GFEC (a.u.)</b> | <b>GFE (a.u.)</b> |
|---------------|-------------------|--------------------|-------------------|
| <b>cat</b>    | -2085.117451      | 0.437191           | -2084.680259      |
| <b>TMSOTf</b> | -1370.768509      | 0.097153           | -1370.671356      |
| <b>Int01</b>  | -3455.910905      | 0.55935            | -3455.351556      |
| <b>R1</b>     | -1029.254348      | 0.156823           | -1029.097525      |
| <b>P1</b>     | -769.417227       | 0.152415           | -769.264812       |
| <b>TS1</b>    | -4485.153821      | 0.744016           | -4484.409805      |
| <b>Int1</b>   | -3715.743902      | 0.563577           | -3715.180325      |
| <b>TS1'</b>   | -3715.691662      | 0.561379           | -3715.130283      |
| <b>R2</b>     | -1261.400584      | 0.251548           | -1261.149036      |
| <b>Int02</b>  | -4977.192798      | 0.847912           | -4976.344885      |
| <b>TS2S</b>   | -4977.186903      | 0.848351           | -4976.338551      |
| <b>Ts2R</b>   | -4977.183576      | 0.847495           | -4976.336081      |
| <b>TS2'S</b>  | -4977.181614      | 0.847605           | -4976.334009      |
| <b>TS2'R</b>  | -4977.176463      | 0.841788           | -4976.334675      |
| <b>Int2S</b>  | -4977.198984      | 0.849864           | -4976.34912       |
| <b>Int2R</b>  | -4977.197088      | 0.847777           | -4976.349311      |
| <b>TS3S</b>   | -4977.195027      | 0.851929           | -4976.343098      |
| <b>TS3R</b>   | -4977.192049      | 0.848746           | -4976.343303      |
| <b>Int3S</b>  | -4977.196456      | 0.848594           | -4976.347862      |
| <b>Int3R</b>  | -4977.195385      | 0.844518           | -4976.350866      |
| <b>TS4S</b>   | -4977.194445      | 0.84865            | -4976.345796      |
| <b>TS4R</b>   | -4977.193964      | 0.849067           | -4976.344897      |

---

|                 |              |          |              |
|-----------------|--------------|----------|--------------|
| <b>PS</b>       | -1930.045922 | 0.358692 | -1929.68723  |
| <b>TfOH</b>     | -962.018555  | 0.004259 | -962.014296  |
| <b>Int02-se</b> | -6978.4284   | 0.847553 | -6977.580848 |
| <b>TS2S-Se</b>  | -6978.41537  | 0.849457 | -6977.565914 |
| <b>TS2R-Se</b>  | -6978.405254 | 0.847574 | -6977.55768  |
| <b>Int2S-se</b> | -6978.419211 | 0.850159 | -6977.569052 |
| <b>Int2R-se</b> | -6978.411859 | 0.846501 | -6977.565359 |
| <b>TS5</b>      | -1261.429415 | 0.261453 | -1261.167962 |
| <b>TS6</b>      | -1300.780013 | 0.285126 | -1300.494887 |
| <b>TS7</b>      | -1379.363968 | 0.342668 | -1379.0213   |
| <b>TS8</b>      | -1929.977347 | 0.359503 | -1929.617844 |

### 3.2 Absolute SPE and GFE of the optimized structures by other DFT methods

**Table S10.** Absolute SPE and GFE of the optimized structures obtained at the M06-2X/6-31G(d, p)/IEF-PCM<sub>dichloromethane</sub> level.

|             | <b>SPE(a.u.)</b> | <b>GFEC(a.u.)</b> | <b>CFE(a.u.)</b> | <b><math>\Delta\Delta G^\ddagger</math></b> |
|-------------|------------------|-------------------|------------------|---------------------------------------------|
| <b>TS2R</b> | -4975.630848     | 0.860363          | -4974.770485     | 2.0                                         |
| <b>TS2S</b> | -4975.633867     | 0.860157          | -4974.77371      | 0.0                                         |

**Table S11.** Absolute SPE and GFE of the Optimized Structures obtained at the  $\omega$ B97X-D /6-31G(d, p)/IEF-PCM<sub>dichloromethane</sub> level..

|             | <b>SPE(a.u.)</b> | <b>GFEC(a.u.)</b> | <b>CFE(a.u.)</b> | <b><math>\Delta\Delta G^\ddagger</math></b> |
|-------------|------------------|-------------------|------------------|---------------------------------------------|
| <b>TS2R</b> | -4976.022087     | 0.86361           | -4975.158477     | 2.1                                         |
| <b>TS2S</b> | -4976.02706      | 0.865268          | -4975.161792     | 0.0                                         |

**Table 12** Absolute SPE and GFE of the different conformers of TS2R/S

|                                                              | <b>SPE(a.u.)</b> | <b>GFEC(a.u.)</b> | <b>CFE(a.u.)</b> |
|--------------------------------------------------------------|------------------|-------------------|------------------|
| <b>TS2R(<math>\Phi_1=-96^\circ/\Phi_2=-143^\circ</math>)</b> | -4977.183576     | 0.847495          | -4976.336081     |



---

|                                                              |              |          |              |
|--------------------------------------------------------------|--------------|----------|--------------|
| <b>TS2R(<math>\Phi_1=66^\circ/\Phi_2=-165^\circ</math>)</b>  | -4977.158625 | 0.847843 | -4976.310782 |
| <b>TS2R(<math>\Phi_1=120^\circ/\Phi_2=-146^\circ</math>)</b> | -4977.159441 | 0.840488 | -4976.318953 |
| <b>TS2R(<math>\Phi_1=-84^\circ/\Phi_2=-35^\circ</math>)</b>  | -4977.122475 | 0.840592 | -4976.281883 |
| <b>TS2R(<math>\Phi_1=-102^\circ/\Phi_2=106^\circ</math>)</b> | -4977.156219 | 0.843183 | -4976.313036 |
| <b>TS2S(<math>\Phi_1=101^\circ/\Phi_2=-31^\circ</math>)</b>  | -4977.186903 | 0.848351 | -4976.338551 |
| <b>TS2S(<math>\Phi_1=-60^\circ/\Phi_2=9^\circ</math>)</b>    | -4977.162922 | 0.848999 | -4976.313924 |
| <b>TS2S(<math>\Phi_1=-118^\circ/\Phi_2=48^\circ</math>)</b>  | -4977.161364 | 0.840484 | -4976.320881 |
| <b>TS2S(<math>\Phi_1=92^\circ/\Phi_2=-134^\circ</math>)</b>  | -4977.163089 | 0.845703 | -4976.317386 |
| <b>TS2S(<math>\Phi_1=57^\circ/\Phi_2=48^\circ</math>)</b>    | -4977.178459 | 0.845546 | -4976.332913 |

---

### 3.3 The Cartesian coordinates and representative vibrational frequencies of all the stationary points

#### Cat

##### Cartesian coordinates

|   |           |           |           |
|---|-----------|-----------|-----------|
| C | 0.606689  | -1.623985 | 0.303637  |
| C | 1.182754  | -1.239256 | -0.909193 |
| C | 2.358121  | -1.831033 | -1.368763 |
| C | 2.958742  | -2.824474 | -0.593625 |
| C | 2.379110  | -3.220940 | 0.618356  |
| C | 1.200399  | -2.624756 | 1.073421  |
| C | -0.615118 | -0.796474 | 0.615263  |
| C | -0.906680 | -0.033682 | -0.698199 |
| C | 0.375823  | -0.141786 | -1.574864 |
| H | 2.806915  | -1.515907 | -2.306653 |
| H | 3.878402  | -3.292825 | -0.931041 |
| H | 2.853066  | -3.998203 | 1.210771  |
| H | 0.758016  | -2.930308 | 2.017548  |
| H | -1.467347 | -1.394350 | 0.949998  |
| H | -1.161629 | 1.003697  | -0.517584 |
| H | -0.394922 | -0.077538 | 1.412716  |
| S | 1.747385  | 2.046208  | -0.506089 |
| O | 0.754914  | 2.122049  | 0.576453  |
| O | 2.242617  | 3.268450  | -1.155695 |
| C | 3.166340  | 1.151920  | 0.113829  |
| C | 3.064645  | 0.429829  | 1.302821  |
| C | 4.341436  | 1.143023  | -0.640589 |
| C | 4.153259  | -0.325559 | 1.727098  |
| H | 2.145487  | 0.454743  | 1.874813  |
| C | 5.419819  | 0.380467  | -0.199843 |

|   |           |           |           |
|---|-----------|-----------|-----------|
| H | 4.413730  | 1.727081  | -1.551983 |
| C | 5.338629  | -0.373770 | 0.979882  |
| H | 4.076214  | -0.897967 | 2.646662  |
| H | 6.337015  | 0.368325  | -0.781460 |
| C | 6.483265  | -1.250591 | 1.420927  |
| H | 7.428899  | -0.938479 | 0.970206  |
| H | 6.598043  | -1.241219 | 2.508794  |
| H | 6.300277  | -2.290191 | 1.122695  |
| N | 1.048877  | 1.170078  | -1.755009 |
| H | 1.657054  | 1.206898  | -2.568354 |
| S | -2.301638 | -0.774357 | -1.674049 |
| C | -3.620474 | -0.827532 | -0.462878 |
| C | -4.275518 | -2.047535 | -0.193367 |
| C | -4.019535 | 0.353910  | 0.208828  |
| C | -5.315992 | -2.063919 | 0.745460  |
| C | -5.045511 | 0.305081  | 1.160535  |
| C | -5.689426 | -0.903272 | 1.418081  |
| H | -5.822702 | -3.000451 | 0.958029  |
| H | -5.346234 | 1.201633  | 1.688314  |
| H | -6.488786 | -0.934435 | 2.152553  |
| C | -3.870548 | -3.329753 | -0.881421 |
| H | -4.040132 | -3.279775 | -1.962309 |
| H | -2.803703 | -3.531172 | -0.741034 |
| H | -4.440532 | -4.175761 | -0.489460 |
| O | -3.371049 | 1.498134  | -0.143382 |
| C | -3.351875 | 2.651541  | 0.734015  |
| C | -2.721685 | 3.762762  | -0.094137 |
| C | -2.556686 | 2.348824  | 2.001867  |
| H | -4.384664 | 2.927436  | 0.982940  |
| H | -3.283198 | 3.920099  | -1.018763 |

|   |           |           |           |
|---|-----------|-----------|-----------|
| H | -2.716010 | 4.696080  | 0.476095  |
| H | -1.688452 | 3.505026  | -0.346292 |
| H | -1.515742 | 2.134021  | 1.744361  |
| H | -2.578063 | 3.215774  | 2.669160  |
| H | -2.973610 | 1.493705  | 2.539908  |
| H | 0.126800  | -0.419382 | -2.605238 |

Vibrational frequencies

|          |          |          |
|----------|----------|----------|
| 17.7335  | 21.8435  | 27.7049  |
| 39.5180  | 52.3877  | 57.5079  |
| 61.4505  | 62.9074  | 76.1294  |
| 77.2802  | 86.2123  | 106.6104 |
| 127.0794 | 133.5766 | 140.5329 |
| 162.0468 | 176.7592 | 182.1948 |
| 194.2187 | 231.3712 | 238.4467 |
| 241.7713 | 245.4405 | 257.6924 |
| 268.0465 | 279.4818 | 293.2740 |
| 304.6298 | 311.6807 | 329.2584 |

**TMSOTf**

|    |           |           |           |
|----|-----------|-----------|-----------|
| Si | -2.022035 | -0.197998 | 0.012443  |
| C  | -1.668141 | -1.378252 | -1.391303 |
| H  | -1.184249 | -2.291373 | -1.034250 |
| H  | -2.605953 | -1.656438 | -1.884205 |
| H  | -1.016956 | -0.908719 | -2.133526 |
| C  | -2.893074 | -0.986482 | 1.461874  |
| H  | -2.342149 | -1.859950 | 1.823417  |
| H  | -3.002669 | -0.278350 | 2.288601  |
| H  | -3.893426 | -1.316148 | 1.160826  |
| C  | -2.779471 | 1.411264  | -0.555042 |
| H  | -2.870599 | 2.118140  | 0.275387  |

|   |           |           |           |
|---|-----------|-----------|-----------|
| H | -2.161837 | 1.867833  | -1.333497 |
| H | -3.779810 | 1.236706  | -0.965742 |
| O | -0.461366 | 0.221847  | 0.751394  |
| S | 0.796732  | 0.888070  | 0.071020  |
| O | 1.400034  | 1.839422  | 0.995224  |
| O | 0.520619  | 1.264587  | -1.315005 |
| C | 1.925717  | -0.600437 | 0.013628  |
| F | 1.362710  | -1.557966 | -0.727181 |
| F | 3.083519  | -0.234317 | -0.534966 |
| F | 2.135320  | -1.055745 | 1.247104  |

#### Vibrational frequencies

|          |          |          |
|----------|----------|----------|
| 32.2977  | 44.3101  | 64.5507  |
| 115.2338 | 135.3656 | 137.4954 |
| 149.3335 | 158.8933 | 174.5119 |
| 187.0846 | 198.1919 | 208.9054 |
| 235.1604 | 247.3644 | 298.2855 |
| 309.8910 | 328.2869 | 394.4772 |
| 491.5861 | 534.8717 | 556.7906 |
| 589.0807 | 599.9792 | 663.5628 |
| 706.8802 | 709.9580 | 712.7540 |
| 762.5653 | 786.2463 | 787.2033 |

#### Int01

##### Cartesian coordinates

|   |           |          |           |
|---|-----------|----------|-----------|
| C | 0.804792  | 2.986841 | -1.070083 |
| C | -0.149552 | 1.975569 | -1.197948 |
| C | -1.420506 | 2.233822 | -1.710474 |
| C | -1.730886 | 3.537103 | -2.099773 |
| C | -0.775499 | 4.555946 | -1.983848 |
| C | 0.495669  | 4.288366 | -1.469139 |

|   |           |           |           |
|---|-----------|-----------|-----------|
| C | 2.075924  | 2.465947  | -0.440697 |
| C | 1.891802  | 0.927423  | -0.412524 |
| C | 0.392975  | 0.648278  | -0.718612 |
| H | -2.155226 | 1.436983  | -1.784309 |
| H | -2.717033 | 3.764746  | -2.493152 |
| H | -1.028369 | 5.565821  | -2.293847 |
| H | 1.229419  | 5.084315  | -1.375611 |
| H | 2.976319  | 2.765970  | -0.984602 |
| H | 2.155423  | 0.500023  | 0.548296  |
| H | 2.175002  | 2.843582  | 0.583993  |
| S | -0.599451 | 0.783523  | 1.880579  |
| O | 0.667125  | 1.398642  | 2.306247  |
| O | -1.250400 | -0.246836 | 2.705951  |
| C | -1.783428 | 2.101045  | 1.626117  |
| C | -1.338943 | 3.421379  | 1.555256  |
| C | -3.126499 | 1.777186  | 1.425238  |
| C | -2.255972 | 4.424899  | 1.259484  |
| H | -0.292261 | 3.650066  | 1.712712  |
| C | -4.027788 | 2.794980  | 1.125133  |
| H | -3.461505 | 0.750987  | 1.502703  |
| C | -3.606462 | 4.128783  | 1.025356  |
| H | -1.913874 | 5.453155  | 1.191086  |
| H | -5.072809 | 2.548178  | 0.961268  |
| C | -4.570378 | 5.220342  | 0.634528  |
| H | -5.607371 | 4.930449  | 0.822592  |
| H | -4.365761 | 6.148018  | 1.177055  |
| H | -4.476603 | 5.442743  | -0.435525 |
| N | -0.308807 | 0.012412  | 0.423159  |
| H | -1.141522 | -0.488067 | 0.124071  |
| S | 2.912398  | 0.026472  | -1.670081 |

|    |           |           |           |
|----|-----------|-----------|-----------|
| C  | 4.521067  | 0.036852  | -0.879767 |
| C  | 5.623535  | 0.647879  | -1.510402 |
| C  | 4.692337  | -0.625942 | 0.362281  |
| C  | 6.877483  | 0.591739  | -0.885493 |
| C  | 5.952362  | -0.655687 | 0.972018  |
| C  | 7.036145  | -0.048181 | 0.340604  |
| H  | 7.730349  | 1.062734  | -1.364974 |
| H  | 6.090948  | -1.153491 | 1.923480  |
| H  | 8.012318  | -0.076681 | 0.815774  |
| C  | 5.484147  | 1.356179  | -2.837622 |
| H  | 5.200278  | 0.662279  | -3.635971 |
| H  | 4.704281  | 2.122920  | -2.799194 |
| H  | 6.425933  | 1.831853  | -3.122399 |
| O  | 3.583771  | -1.220394 | 0.881087  |
| C  | 3.528785  | -1.653845 | 2.262047  |
| C  | 2.247513  | -2.471480 | 2.356349  |
| C  | 3.521660  | -0.454867 | 3.207660  |
| H  | 4.391174  | -2.302168 | 2.465452  |
| H  | 2.276444  | -3.312197 | 1.658322  |
| H  | 2.121920  | -2.861267 | 3.370418  |
| H  | 1.383821  | -1.846199 | 2.112869  |
| H  | 4.413256  | 0.163668  | 3.078963  |
| H  | 2.636937  | 0.160547  | 3.023220  |
| H  | 3.495743  | -0.803417 | 4.244708  |
| H  | 0.284805  | -0.106182 | -1.502174 |
| Si | -0.924538 | -4.133241 | -0.127397 |
| C  | -1.154121 | -3.641340 | 1.656634  |
| H  | -1.115006 | -2.559267 | 1.806053  |
| H  | -2.106288 | -4.014178 | 2.046208  |
| H  | -0.348452 | -4.087010 | 2.251078  |

|   |           |           |           |
|---|-----------|-----------|-----------|
| C | -1.008397 | -5.976712 | -0.408077 |
| H | -1.936401 | -6.394770 | -0.006648 |
| H | -0.953957 | -6.213091 | -1.474982 |
| H | -0.168090 | -6.468813 | 0.093682  |
| C | 0.531397  | -3.314363 | -0.958485 |
| H | 0.656786  | -2.280816 | -0.630974 |
| H | 1.444369  | -3.858468 | -0.692057 |
| H | 0.437011  | -3.329648 | -2.047829 |
| O | -3.733385 | -2.575675 | -2.784547 |
| S | -2.902388 | -2.289727 | -1.625532 |
| O | -1.822174 | -1.302125 | -1.715691 |
| O | -2.416084 | -3.626994 | -0.976237 |
| C | -4.022122 | -1.658617 | -0.270779 |
| F | -5.025212 | -2.499657 | -0.057472 |
| F | -3.296536 | -1.528418 | 0.852434  |
| F | -4.491456 | -0.461834 | -0.625197 |

Vibrational frequencies

|          |          |          |
|----------|----------|----------|
| 21.2951  | 22.6146  | 24.2916  |
| 29.2816  | 31.9317  | 35.3309  |
| 42.5491  | 46.6675  | 51.7258  |
| 51.7596  | 61.8995  | 64.4910  |
| 65.7672  | 66.9024  | 69.7363  |
| 78.3420  | 80.9070  | 86.7800  |
| 94.1151  | 106.2654 | 108.8491 |
| 121.1140 | 135.2688 | 142.0087 |
| 142.7198 | 145.4658 | 149.8493 |
| 165.1334 | 169.9725 | 179.6261 |

**R1**

Cartesian coordinates



|   |           |           |           |
|---|-----------|-----------|-----------|
| C | -2.244306 | 1.126730  | -0.400798 |
| C | -2.162339 | -1.207554 | -0.093826 |
| C | -3.135907 | -0.979044 | -1.238915 |
| C | -3.175179 | 0.541390  | -1.451222 |
| H | -2.781145 | -1.532988 | -2.111510 |
| H | -4.104208 | -1.401100 | -0.956530 |
| H | -2.817368 | 0.850140  | -2.436835 |
| H | -4.169244 | 0.974808  | -1.314568 |
| N | -1.735262 | 0.055419  | 0.361596  |
| O | -1.795513 | -2.270201 | 0.359361  |
| O | -1.966753 | 2.293419  | -0.230956 |
| S | -0.628733 | 0.265433  | 1.684563  |
| C | 0.937225  | 0.132761  | 0.825242  |
| C | 1.477629  | -1.129394 | 0.542938  |
| C | 1.627590  | 1.290249  | 0.445167  |
| C | 2.699661  | -1.223691 | -0.118865 |
| H | 0.927963  | -2.021197 | 0.824017  |
| C | 2.853887  | 1.180035  | -0.208778 |
| H | 1.199262  | 2.265472  | 0.651238  |
| C | 3.409427  | -0.074354 | -0.499041 |
| H | 3.111286  | -2.204162 | -0.342760 |
| H | 3.384347  | 2.081208  | -0.504077 |
| C | 4.751030  | -0.187226 | -1.180251 |
| H | 5.557801  | -0.234399 | -0.438661 |
| H | 4.815338  | -1.093452 | -1.789187 |
| H | 4.948350  | 0.675657  | -1.822452 |

Vibrational frequencies

|          |          |          |
|----------|----------|----------|
| 29.9130  | 35.8768  | 43.1811  |
| 47.7101  | 69.0891  | 98.9067  |
| 125.6987 | 187.4835 | 240.2166 |

|          |          |          |
|----------|----------|----------|
| 279.1407 | 304.4854 | 368.8172 |
| 385.7577 | 407.5906 | 421.4249 |
| 499.7424 | 529.2294 | 560.8180 |
| 564.9866 | 581.6380 | 638.6731 |
| 647.1302 | 648.0938 | 657.3403 |
| 723.1039 | 813.0384 | 831.1253 |
| 838.0134 | 856.2275 | 939.0596 |

## P1

Cartesian coordinates

|    |           |           |           |
|----|-----------|-----------|-----------|
| C  | -1.134149 | -1.150210 | -0.000035 |
| C  | -1.264435 | 1.158462  | -0.000140 |
| C  | -2.713251 | 0.678570  | -0.000197 |
| C  | -2.626461 | -0.848730 | 0.000257  |
| H  | -3.214539 | 1.090466  | 0.879743  |
| H  | -3.214224 | 1.089883  | -0.880597 |
| H  | -3.076169 | -1.315195 | 0.880895  |
| H  | -3.076770 | -1.315838 | -0.879724 |
| N  | -0.411256 | 0.046746  | -0.000266 |
| O  | -0.905612 | 2.321221  | -0.000034 |
| O  | -0.627545 | -2.260109 | -0.000004 |
| Si | 1.422893  | 0.026715  | -0.000052 |
| C  | 2.049595  | 1.792192  | -0.000502 |
| H  | 1.712160  | 2.340396  | 0.882091  |
| H  | 3.145898  | 1.771356  | -0.001100 |
| H  | 1.711171  | 2.340456  | -0.882670 |
| C  | 1.929406  | -0.880711 | 1.562474  |
| H  | 1.484990  | -1.878807 | 1.583969  |
| H  | 3.019106  | -0.982376 | 1.610310  |
| H  | 1.601873  | -0.334717 | 2.453385  |

|   |          |           |           |
|---|----------|-----------|-----------|
| C | 1.929763 | -0.882034 | -1.561667 |
| H | 1.485420 | -1.880196 | -1.582090 |
| H | 1.602341 | -0.337092 | -2.453252 |
| H | 3.019480 | -0.983709 | -1.609207 |

#### Vibrational frequencies

|          |          |          |
|----------|----------|----------|
| 27.1351  | 49.8445  | 72.3022  |
| 139.6009 | 156.1962 | 157.1730 |
| 159.2419 | 173.7559 | 175.6845 |
| 203.5150 | 215.9442 | 239.9359 |
| 296.3351 | 337.3216 | 471.8127 |
| 563.1506 | 565.5223 | 575.7509 |
| 615.3425 | 659.2711 | 671.6328 |
| 705.0496 | 705.2891 | 705.7461 |
| 783.5940 | 787.7659 | 841.2473 |
| 873.7725 | 879.1360 | 882.7261 |

#### **TS1**

##### Cartesian coordinates

|   |           |           |           |
|---|-----------|-----------|-----------|
| C | 1.386281  | -3.373384 | -1.678868 |
| C | 1.770136  | -2.035205 | -1.594737 |
| C | 2.873839  | -1.546787 | -2.293148 |
| C | 3.603949  | -2.433947 | -3.084093 |
| C | 3.228925  | -3.781502 | -3.169155 |
| C | 2.119115  | -4.260847 | -2.468460 |
| C | 0.175017  | -3.662362 | -0.823532 |
| C | -0.253590 | -2.272431 | -0.284864 |
| C | 0.862534  | -1.253556 | -0.672386 |
| H | 3.169104  | -0.506445 | -2.196540 |
| H | 4.472496  | -2.080422 | -3.631065 |
| H | 3.807819  | -4.461532 | -3.787123 |

|   |           |           |           |
|---|-----------|-----------|-----------|
| H | 1.832870  | -5.306387 | -2.538335 |
| H | -0.619199 | -4.170069 | -1.381067 |
| H | -0.410952 | -2.263820 | 0.785814  |
| H | 0.432523  | -4.301659 | 0.026095  |
| S | 2.391318  | -1.541641 | 1.615604  |
| O | 1.736561  | -2.853670 | 1.760158  |
| O | 2.549941  | -0.653867 | 2.775660  |
| C | 4.011656  | -1.796159 | 0.909102  |
| C | 4.352232  | -3.032821 | 0.364397  |
| C | 4.889300  | -0.710423 | 0.857237  |
| C | 5.594422  | -3.175648 | -0.249746 |
| H | 3.651093  | -3.857536 | 0.406265  |
| C | 6.118707  | -0.869157 | 0.227943  |
| H | 4.614406  | 0.236469  | 1.302605  |
| C | 6.487855  | -2.099343 | -0.339803 |
| H | 5.866225  | -4.135031 | -0.679693 |
| H | 6.799530  | -0.024611 | 0.175896  |
| C | 7.804031  | -2.245713 | -1.061628 |
| H | 8.583347  | -1.631784 | -0.601191 |
| H | 8.143006  | -3.285077 | -1.072921 |
| H | 7.706273  | -1.919471 | -2.104238 |
| N | 1.473701  | -0.654297 | 0.528888  |
| H | 1.937639  | 0.235121  | 0.332799  |
| S | -1.884800 | -1.778229 | -1.026384 |
| C | -3.089284 | -2.593831 | -0.001858 |
| C | -4.119367 | -3.306370 | -0.655609 |
| C | -3.077444 | -2.440442 | 1.409849  |
| C | -5.096626 | -3.915781 | 0.135000  |
| C | -4.064925 | -3.081452 | 2.168954  |
| C | -5.060089 | -3.809928 | 1.525097  |

|   |           |           |           |
|---|-----------|-----------|-----------|
| H | -5.891370 | -4.476722 | -0.345164 |
| H | -4.067041 | -2.999501 | 3.247499  |
| H | -5.826482 | -4.295701 | 2.121060  |
| C | -4.200885 | -3.407938 | -2.160704 |
| H | -4.341040 | -2.421023 | -2.614287 |
| H | -3.292242 | -3.838951 | -2.591782 |
| H | -5.045906 | -4.034319 | -2.452732 |
| O | -2.122494 | -1.635761 | 1.916358  |
| C | -1.912291 | -1.486959 | 3.353723  |
| C | -1.103955 | -0.208429 | 3.510356  |
| C | -1.196323 | -2.720087 | 3.893479  |
| H | -2.892406 | -1.358856 | 3.827703  |
| H | -1.624530 | 0.644282  | 3.068977  |
| H | -0.945350 | -0.012410 | 4.575146  |
| H | -0.125958 | -0.308627 | 3.032514  |
| H | -1.774980 | -3.631727 | 3.721471  |
| H | -0.221824 | -2.825683 | 3.407490  |
| H | -1.040372 | -2.613388 | 4.971002  |
| H | 0.457856  | -0.384344 | -1.199058 |
| C | -2.961348 | 3.137090  | 0.977339  |
| C | -2.978685 | 3.494789  | -1.259292 |
| C | -4.288083 | 4.123206  | -0.775694 |
| C | -4.263793 | 3.906506  | 0.733220  |
| H | -4.316605 | 5.173259  | -1.079853 |
| H | -5.114686 | 3.612315  | -1.278336 |
| H | -4.244080 | 4.832436  | 1.315547  |
| H | -5.093821 | 3.300231  | 1.106098  |
| N | -2.243739 | 2.960470  | -0.203448 |
| O | -2.653289 | 3.455806  | -2.441501 |
| O | -2.635868 | 2.720030  | 2.083747  |

|    |           |           |           |
|----|-----------|-----------|-----------|
| S  | -2.075096 | 0.499015  | -0.584090 |
| C  | -3.847582 | 0.454175  | -0.706851 |
| C  | -4.618429 | 0.303539  | 0.455731  |
| C  | -4.478161 | 0.576087  | -1.953424 |
| C  | -6.006802 | 0.269522  | 0.364419  |
| H  | -4.123654 | 0.229360  | 1.416449  |
| C  | -5.868418 | 0.533760  | -2.029409 |
| H  | -3.879553 | 0.722942  | -2.845368 |
| C  | -6.653208 | 0.372753  | -0.876819 |
| H  | -6.597966 | 0.155136  | 1.268525  |
| H  | -6.352760 | 0.630768  | -2.996871 |
| C  | -8.155360 | 0.285384  | -0.971690 |
| H  | -8.636699 | 0.690742  | -0.077328 |
| H  | -8.534452 | 0.823854  | -1.844461 |
| H  | -8.472302 | -0.760328 | -1.067563 |
| Si | 0.286004  | 3.380371  | -0.274984 |
| C  | 0.350934  | 2.397605  | 1.316407  |
| H  | 0.034117  | 1.365901  | 1.168891  |
| H  | 1.360748  | 2.393730  | 1.730847  |
| H  | -0.340622 | 2.828521  | 2.040378  |
| C  | -0.246747 | 5.179688  | -0.189111 |
| H  | -0.831334 | 5.360209  | 0.717079  |
| H  | 0.620204  | 5.845159  | -0.188139 |
| H  | -0.872814 | 5.421680  | -1.052493 |
| C  | 0.327089  | 2.582154  | -1.971887 |
| H  | 0.832541  | 1.614675  | -1.937785 |
| H  | -0.671810 | 2.475311  | -2.388322 |
| H  | 0.915563  | 3.230194  | -2.630965 |
| O  | 4.182586  | 3.458327  | -1.737366 |
| S  | 3.378530  | 2.929092  | -0.636799 |

|   |          |          |           |
|---|----------|----------|-----------|
| O | 3.026426 | 1.495265 | -0.666911 |
| O | 2.185650 | 3.830725 | -0.292968 |
| C | 4.418521 | 3.119229 | 0.899662  |
| F | 4.644484 | 4.404751 | 1.160940  |
| F | 3.794834 | 2.555164 | 1.943539  |
| F | 5.587067 | 2.490995 | 0.711368  |

Vibrational frequencies

|           |          |          |
|-----------|----------|----------|
| -141.4257 | 17.1491  | 18.2812  |
| 20.7515   | 28.4456  | 31.0756  |
| 32.4247   | 35.3018  | 36.0993  |
| 39.9563   | 44.4312  | 46.4004  |
| 47.0180   | 49.3119  | 53.3544  |
| 54.3046   | 60.0467  | 62.9953  |
| 66.8305   | 71.7406  | 75.0190  |
| 76.9208   | 81.4690  | 82.8083  |
| 84.9914   | 87.2735  | 94.4433  |
| 99.2026   | 104.7661 | 108.8173 |

**Int1**

Cartesian coordinates

|   |           |           |           |
|---|-----------|-----------|-----------|
| C | -0.566482 | -2.053640 | -1.952554 |
| C | 0.360890  | -1.089511 | -1.555727 |
| C | 1.554077  | -0.901671 | -2.252697 |
| C | 1.810809  | -1.711838 | -3.359288 |
| C | 0.883739  | -2.682425 | -3.761715 |
| C | -0.312426 | -2.859433 | -3.062409 |
| C | -1.762002 | -2.087546 | -1.030841 |
| C | -1.561533 | -0.857081 | -0.116449 |
| C | -0.111394 | -0.333333 | -0.328680 |
| H | 2.265414  | -0.152747 | -1.921651 |
| H | 2.737475  | -1.590771 | -3.911906 |

|   |           |           |           |
|---|-----------|-----------|-----------|
| H | 1.097528  | -3.304015 | -4.626216 |
| H | -1.029300 | -3.613018 | -3.375814 |
| H | -2.717846 | -2.086715 | -1.564824 |
| H | -1.769635 | -1.053181 | 0.927877  |
| H | -1.753963 | -2.980328 | -0.398142 |
| S | 1.106616  | -1.921868 | 1.562806  |
| O | -0.107599 | -2.759589 | 1.541131  |
| O | 1.764018  | -1.600714 | 2.836035  |
| C | 2.318935  | -2.682512 | 0.491277  |
| C | 1.961425  | -3.772803 | -0.300234 |
| C | 3.589495  | -2.109034 | 0.407523  |
| C | 2.892946  | -4.283942 | -1.199949 |
| H | 0.967641  | -4.196341 | -0.222006 |
| C | 4.503346  | -2.629497 | -0.503147 |
| H | 3.861073  | -1.272996 | 1.038072  |
| C | 4.167263  | -3.714060 | -1.327414 |
| H | 2.618980  | -5.127650 | -1.826444 |
| H | 5.488698  | -2.178886 | -0.579592 |
| C | 5.138339  | -4.228701 | -2.359956 |
| H | 6.174903  | -4.041279 | -2.067048 |
| H | 5.013867  | -5.302135 | -2.528567 |
| H | 4.972098  | -3.725447 | -3.320465 |
| N | 0.683923  | -0.442580 | 0.908327  |
| H | 1.489884  | 0.195008  | 0.868610  |
| S | -2.737007 | 0.500849  | -0.609533 |
| C | -4.352308 | -0.202795 | -0.373431 |
| C | -5.245735 | -0.178297 | -1.465044 |
| C | -4.693323 | -0.780595 | 0.872423  |
| C | -6.487005 | -0.794225 | -1.285985 |
| C | -5.941171 | -1.397276 | 1.009028  |



|   |           |           |           |
|---|-----------|-----------|-----------|
| C | -6.819791 | -1.396784 | -0.071656 |
| H | -7.195788 | -0.802958 | -2.106963 |
| H | -6.226729 | -1.859174 | 1.944930  |
| H | -7.789336 | -1.871687 | 0.040297  |
| C | -4.889343 | 0.465874  | -2.783259 |
| H | -4.612848 | 1.517297  | -2.654970 |
| H | -4.041264 | -0.036502 | -3.260333 |
| H | -5.736257 | 0.420140  | -3.469824 |
| O | -3.773640 | -0.650410 | 1.849973  |
| C | -3.823076 | -1.447207 | 3.075370  |
| C | -2.809445 | -0.790815 | 3.998796  |
| C | -3.490654 | -2.901541 | 2.761571  |
| H | -4.828566 | -1.353192 | 3.500709  |
| H | -3.062215 | 0.258906  | 4.167282  |
| H | -2.798325 | -1.308821 | 4.961395  |
| H | -1.807037 | -0.846860 | 3.563871  |
| H | -4.181471 | -3.323637 | 2.026990  |
| H | -2.469570 | -2.980717 | 2.377093  |
| H | -3.563214 | -3.496788 | 3.676306  |
| H | -0.084692 | 0.743014  | -0.524573 |
| S | -2.492298 | 1.994581  | 0.918999  |
| C | -1.666334 | 3.254275  | -0.029636 |
| C | -2.384959 | 4.078176  | -0.910976 |
| C | -0.290510 | 3.451381  | 0.160259  |
| C | -1.717458 | 5.079007  | -1.607852 |
| H | -3.451905 | 3.931617  | -1.045417 |
| C | 0.356554  | 4.472821  | -0.530590 |
| H | 0.278106  | 2.829397  | 0.841511  |
| C | -0.339327 | 5.292230  | -1.430115 |
| H | -2.272621 | 5.713004  | -2.293324 |

|   |           |          |           |
|---|-----------|----------|-----------|
| H | 1.417537  | 4.624273 | -0.361944 |
| C | 0.379244  | 6.363573 | -2.209615 |
| H | -0.278320 | 7.209428 | -2.428968 |
| H | 1.254137  | 6.731904 | -1.667732 |
| H | 0.732108  | 5.965313 | -3.168743 |
| O | 4.118034  | 3.271133 | -0.437746 |
| S | 3.312776  | 2.480019 | 0.513593  |
| O | 2.487455  | 1.407517 | -0.123528 |
| O | 2.605797  | 3.247418 | 1.561377  |
| C | 4.558836  | 1.484364 | 1.472586  |
| F | 5.394547  | 2.276799 | 2.155902  |
| F | 3.923753  | 0.679384 | 2.348902  |
| F | 5.287291  | 0.705330 | 0.651063  |

Vibrational frequencies

|          |          |          |
|----------|----------|----------|
| 11.8494  | 19.3620  | 22.6997  |
| 25.1254  | 28.6702  | 30.2102  |
| 33.5112  | 43.1405  | 45.9621  |
| 48.6856  | 54.0034  | 55.7862  |
| 58.3551  | 66.1072  | 67.1819  |
| 70.5645  | 72.3891  | 76.5250  |
| 79.1777  | 82.7687  | 87.3431  |
| 87.9083  | 102.1805 | 111.1312 |
| 119.2515 | 136.0764 | 143.5801 |
| 148.3770 | 166.1612 | 170.1841 |

**TS1'**

Cartesian coordinates

|   |           |          |           |
|---|-----------|----------|-----------|
| C | -1.007425 | 4.082526 | -0.857991 |
| C | -1.344286 | 3.154896 | -1.847013 |
| C | -1.934539 | 3.558245 | -3.043546 |
| C | -2.177659 | 4.917416 | -3.248488 |

|   |           |           |           |
|---|-----------|-----------|-----------|
| C | -1.835041 | 5.852791  | -2.262995 |
| C | -1.250745 | 5.441350  | -1.062394 |
| C | -0.424032 | 3.405798  | 0.357987  |
| C | -0.160683 | 1.956976  | -0.112500 |
| C | -0.988670 | 1.746463  | -1.426043 |
| H | -2.204640 | 2.824434  | -3.797061 |
| H | -2.633187 | 5.252618  | -4.175496 |
| H | -2.026490 | 6.908192  | -2.434527 |
| H | -0.990769 | 6.169210  | -0.298761 |
| H | 0.475200  | 3.902708  | 0.731886  |
| H | -0.413249 | 1.210513  | 0.629304  |
| H | -1.153991 | 3.388360  | 1.172101  |
| S | -3.457510 | 1.277956  | -0.310247 |
| O | -4.432551 | 2.046221  | -1.102424 |
| O | -2.999927 | 1.876144  | 0.962950  |
| C | -4.094520 | -0.353383 | 0.020876  |
| C | -4.831883 | -1.013213 | -0.961270 |
| C | -3.740115 | -0.983262 | 1.214064  |
| C | -5.194391 | -2.341225 | -0.747661 |
| H | -5.103280 | -0.500578 | -1.877598 |
| C | -4.115773 | -2.306721 | 1.410560  |
| H | -3.168457 | -0.445454 | 1.960408  |
| C | -4.823971 | -3.011226 | 0.426456  |
| H | -5.756807 | -2.870203 | -1.511456 |
| H | -3.824298 | -2.812763 | 2.325622  |
| C | -5.130946 | -4.473911 | 0.624187  |
| H | -4.204680 | -5.056916 | 0.560744  |
| H | -5.564383 | -4.661461 | 1.611828  |
| H | -5.821308 | -4.851816 | -0.133833 |
| N | -2.160659 | 0.856490  | -1.309072 |

|   |           |           |           |
|---|-----------|-----------|-----------|
| H | -1.904624 | -0.121505 | -1.145779 |
| S | 1.620005  | 1.684741  | -0.571287 |
| C | 2.585267  | 2.323445  | 0.768050  |
| C | 3.748908  | 3.070279  | 0.472493  |
| C | 2.268456  | 2.002987  | 2.117809  |
| C | 4.551448  | 3.507062  | 1.530189  |
| C | 3.087229  | 2.463594  | 3.156852  |
| C | 4.219604  | 3.213155  | 2.853668  |
| H | 5.440200  | 4.091340  | 1.313423  |
| H | 2.851657  | 2.231651  | 4.187226  |
| H | 4.853250  | 3.567503  | 3.660889  |
| C | 4.131331  | 3.405221  | -0.949254 |
| H | 4.359471  | 2.503521  | -1.529015 |
| H | 3.316643  | 3.918047  | -1.470266 |
| H | 5.014910  | 4.047088  | -0.969421 |
| O | 1.160387  | 1.250955  | 2.292871  |
| C | 0.669785  | 0.878039  | 3.607117  |
| C | 1.435624  | -0.336729 | 4.121834  |
| C | -0.811219 | 0.591945  | 3.405123  |
| H | 0.792836  | 1.733948  | 4.281049  |
| H | 2.511516  | -0.148234 | 4.162237  |
| H | 1.093382  | -0.592664 | 5.129010  |
| H | 1.256501  | -1.192800 | 3.464563  |
| H | -1.334219 | 1.463874  | 3.006359  |
| H | -0.930050 | -0.233055 | 2.699069  |
| H | -1.269618 | 0.306497  | 4.356462  |
| H | -0.383388 | 1.249180  | -2.192285 |
| S | 2.618542  | -1.095111 | 0.688803  |
| C | 3.362532  | -1.971012 | -0.551950 |
| C | 4.180304  | -1.308732 | -1.522683 |

|   |           |           |           |
|---|-----------|-----------|-----------|
| C | 3.224632  | -3.391538 | -0.632785 |
| C | 4.847982  | -2.034438 | -2.481322 |
| H | 4.264575  | -0.228096 | -1.481245 |
| C | 3.912112  | -4.104849 | -1.595610 |
| H | 2.573710  | -3.890659 | 0.072586  |
| C | 4.728212  | -3.446162 | -2.535349 |
| H | 5.473816  | -1.529252 | -3.210489 |
| H | 3.813871  | -5.184522 | -1.641445 |
| C | 5.446803  | -4.211198 | -3.605215 |
| H | 6.489290  | -3.885826 | -3.684220 |
| H | 5.420621  | -5.287953 | -3.428151 |
| H | 4.980374  | -4.013532 | -4.578780 |
| O | 0.254956  | -1.117177 | -0.249178 |
| S | -0.411467 | -2.400310 | -0.659018 |
| O | 0.430180  | -3.324735 | -1.440715 |
| O | -1.777555 | -2.159736 | -1.172677 |
| C | -0.660093 | -3.297757 | 0.962371  |
| F | -1.097211 | -2.462766 | 1.919369  |
| F | -1.557695 | -4.282612 | 0.816107  |
| F | 0.497993  | -3.835469 | 1.383028  |

Vibrational frequencies

|          |          |          |
|----------|----------|----------|
| -93.6174 | 11.5075  | 17.3691  |
| 20.5739  | 25.2877  | 33.0311  |
| 39.4049  | 39.8544  | 44.7261  |
| 46.3582  | 52.1863  | 54.7669  |
| 56.5003  | 60.6271  | 62.4504  |
| 65.6012  | 70.7335  | 76.4328  |
| 83.7675  | 84.4668  | 86.7043  |
| 90.7619  | 98.9722  | 102.5885 |
| 117.6305 | 123.0875 | 126.2378 |

136.0358

145.1162

153.9565

**R2**

Cartesian coordinates

|   |           |           |           |
|---|-----------|-----------|-----------|
| C | 5.764518  | 0.441318  | -1.127309 |
| C | 4.373292  | 0.387223  | -1.025383 |
| C | 3.758020  | -0.142088 | 0.117196  |
| C | 4.568480  | -0.619171 | 1.156209  |
| C | 5.960119  | -0.566767 | 1.058588  |
| C | 6.562396  | -0.036241 | -0.084739 |
| H | 6.224753  | 0.859337  | -2.017957 |
| H | 3.756270  | 0.763404  | -1.837757 |
| H | 4.104006  | -1.030315 | 2.049272  |
| H | 6.573140  | -0.936454 | 1.875537  |
| H | 7.644786  | 0.007896  | -0.161225 |
| C | 2.252797  | -0.245086 | 0.203985  |
| C | 1.739572  | -1.592958 | -0.373364 |
| H | 1.780655  | 0.576961  | -0.345230 |
| H | 1.927342  | -0.165890 | 1.246913  |
| C | 0.282736  | -1.682900 | -0.334001 |
| H | 2.091798  | -1.698401 | -1.407201 |
| H | 2.183021  | -2.422325 | 0.190893  |
| C | -0.930063 | -1.700779 | -0.270130 |
| C | -2.350114 | -1.569372 | -0.212609 |
| C | -3.191364 | -2.632945 | 0.156761  |
| C | -2.931666 | -0.312701 | -0.517520 |
| C | -4.567598 | -2.443744 | 0.255672  |
| H | -2.749740 | -3.598637 | 0.378507  |
| C | -4.312008 | -0.131642 | -0.420237 |
| C | -5.125527 | -1.192594 | -0.022742 |
| H | -5.204652 | -3.271258 | 0.550701  |

|   |           |           |           |
|---|-----------|-----------|-----------|
| H | -4.729411 | 0.840394  | -0.654745 |
| H | -6.197885 | -1.044653 | 0.054376  |
| S | -1.858806 | 2.079176  | 0.110203  |
| O | -0.729301 | 2.818793  | -0.467375 |
| O | -3.157026 | 2.732163  | 0.307259  |
| C | -1.348605 | 1.365271  | 1.683573  |
| H | -0.432424 | 0.796985  | 1.522722  |
| H | -1.182589 | 2.193189  | 2.373998  |
| H | -2.149008 | 0.718559  | 2.043819  |
| N | -2.094646 | 0.763395  | -0.937632 |
| H | -1.175929 | 0.444040  | -1.245202 |

Vibrational frequencies

|          |          |          |
|----------|----------|----------|
| 14.3321  | 20.8619  | 29.5222  |
| 38.7980  | 57.8579  | 69.0577  |
| 78.8361  | 95.6790  | 108.5316 |
| 136.0944 | 180.0852 | 212.5068 |
| 243.8856 | 264.9072 | 275.5612 |
| 291.4484 | 340.8441 | 362.6679 |
| 366.3517 | 391.3374 | 416.2066 |
| 416.6705 | 460.7037 | 474.3007 |
| 490.5777 | 504.8267 | 526.8402 |
| 558.2038 | 561.8401 | 601.7402 |

**Int02**

Cartesian coordinates

|   |           |           |          |
|---|-----------|-----------|----------|
| C | -1.396733 | -2.371428 | 2.150907 |
| C | -1.630363 | -1.271700 | 1.324448 |
| C | -2.555125 | -0.288351 | 1.670384 |
| C | -3.252968 | -0.426351 | 2.871070 |
| C | -3.015281 | -1.522742 | 3.710661 |
| C | -2.083577 | -2.502735 | 3.357609 |

|   |           |           |           |
|---|-----------|-----------|-----------|
| C | -0.395664 | -3.317274 | 1.533610  |
| C | 0.179683  | -2.520043 | 0.335403  |
| C | -0.794172 | -1.337583 | 0.063749  |
| H | -2.717436 | 0.565827  | 1.027935  |
| H | -3.978659 | 0.328301  | 3.157843  |
| H | -3.559708 | -1.611695 | 4.646015  |
| H | -1.903831 | -3.353561 | 4.008528  |
| H | 0.369605  | -3.655976 | 2.238853  |
| H | 0.320254  | -3.119033 | -0.557770 |
| H | -0.888210 | -4.210256 | 1.137911  |
| S | -2.560734 | -2.799591 | -1.513583 |
| O | -1.848671 | -4.022959 | -1.102356 |
| O | -2.957893 | -2.611451 | -2.915971 |
| C | -4.033900 | -2.666339 | -0.509141 |
| C | -4.175716 | -3.475548 | 0.619122  |
| C | -5.008125 | -1.729902 | -0.859139 |
| C | -5.307758 | -3.329784 | 1.414907  |
| H | -3.412316 | -4.202502 | 0.866049  |
| C | -6.134654 | -1.603183 | -0.050410 |
| H | -4.882642 | -1.100783 | -1.733670 |
| C | -6.298079 | -2.388263 | 1.099272  |
| H | -5.420831 | -3.951410 | 2.298297  |
| H | -6.889929 | -0.867221 | -0.308703 |
| C | -7.491552 | -2.197937 | 2.001562  |
| H | -8.351048 | -1.802111 | 1.453805  |
| H | -7.787260 | -3.136476 | 2.479164  |
| H | -7.254416 | -1.485287 | 2.801078  |
| N | -1.537654 | -1.511589 | -1.202036 |
| H | -1.976688 | -0.628262 | -1.487108 |
| S | 1.935728  | -2.024480 | 0.818255  |



|   |           |           |           |
|---|-----------|-----------|-----------|
| C | 2.933872  | -2.794522 | -0.426587 |
| C | 4.018926  | -3.587399 | 0.007677  |
| C | 2.685185  | -2.548162 | -1.800878 |
| C | 4.823818  | -4.171642 | -0.971879 |
| C | 3.504192  | -3.169234 | -2.753220 |
| C | 4.561110  | -3.967363 | -2.327431 |
| H | 5.658397  | -4.794981 | -0.669529 |
| H | 3.326576  | -3.028230 | -3.810554 |
| H | 5.195131  | -4.438837 | -3.071848 |
| C | 4.318750  | -3.813236 | 1.470321  |
| H | 4.547086  | -2.871366 | 1.978840  |
| H | 3.470772  | -4.267950 | 1.991674  |
| H | 5.180579  | -4.473355 | 1.583229  |
| O | 1.673499  | -1.705249 | -2.073719 |
| C | 1.410391  | -1.261206 | -3.442146 |
| C | 0.790957  | 0.120668  | -3.320583 |
| C | 0.510449  | -2.269703 | -4.143548 |
| H | 2.375855  | -1.175591 | -3.953880 |
| H | 1.460121  | 0.814066  | -2.808329 |
| H | 0.588411  | 0.519706  | -4.318129 |
| H | -0.150413 | 0.078369  | -2.770444 |
| H | -0.466563 | -2.303816 | -3.657015 |
| H | 0.370643  | -1.972534 | -5.187273 |
| H | 0.947393  | -3.272000 | -4.129290 |
| H | -0.253165 | -0.403280 | -0.107887 |
| O | -2.333246 | 1.223394  | -1.256296 |
| S | -3.513431 | 1.845360  | -1.948451 |
| O | -4.253061 | 0.904737  | -2.810468 |
| O | -3.230596 | 3.183943  | -2.509772 |
| C | -4.684554 | 2.216449  | -0.543807 |

|   |           |           |           |
|---|-----------|-----------|-----------|
| F | -4.148685 | 3.124123  | 0.286405  |
| F | -5.836256 | 2.701529  | -1.025456 |
| F | -4.950340 | 1.109793  | 0.167311  |
| S | 2.245434  | 0.178964  | 0.590663  |
| C | 3.938696  | 0.061888  | 0.077572  |
| C | 4.279876  | 0.203152  | -1.275784 |
| C | 4.941340  | -0.181913 | 1.028352  |
| C | 5.610233  | 0.095995  | -1.666001 |
| H | 3.505548  | 0.396708  | -2.007492 |
| C | 6.266997  | -0.300387 | 0.621030  |
| H | 4.671017  | -0.278381 | 2.074388  |
| C | 6.622097  | -0.170981 | -0.730332 |
| H | 5.868558  | 0.209317  | -2.715051 |
| H | 7.037491  | -0.496907 | 1.360999  |
| C | 8.051318  | -0.344260 | -1.176687 |
| H | 8.303909  | 0.348621  | -1.984522 |
| H | 8.210536  | -1.359993 | -1.558620 |
| H | 8.752553  | -0.187578 | -0.353076 |
| C | 2.552330  | -0.697038 | 4.290460  |
| C | 3.180608  | 0.545724  | 4.211714  |
| C | 2.459830  | 1.697484  | 3.859950  |
| C | 1.089726  | 1.579156  | 3.605434  |
| C | 0.452088  | 0.339283  | 3.699006  |
| C | 1.181856  | -0.802294 | 4.034971  |
| H | 3.126912  | -1.579006 | 4.560146  |
| H | 4.243956  | 0.626875  | 4.427574  |
| H | 0.518408  | 2.456581  | 3.320996  |
| H | -0.611538 | 0.265142  | 3.504128  |
| H | 0.680518  | -1.762206 | 4.105096  |
| C | 3.169239  | 3.026211  | 3.730074  |

|   |           |          |           |
|---|-----------|----------|-----------|
| C | 4.093053  | 3.104223 | 2.485662  |
| H | 2.440451  | 3.839595 | 3.677844  |
| H | 3.796571  | 3.199212 | 4.612339  |
| C | 3.370611  | 3.137227 | 1.219509  |
| H | 4.788056  | 2.254270 | 2.488352  |
| H | 4.713558  | 4.007037 | 2.556017  |
| C | 2.738271  | 3.211297 | 0.185776  |
| C | 2.093846  | 3.364616 | -1.075880 |
| C | 2.871896  | 3.711365 | -2.199122 |
| C | 0.702825  | 3.175944 | -1.249683 |
| C | 2.292895  | 3.871842 | -3.454392 |
| H | 3.940330  | 3.843511 | -2.065261 |
| C | 0.127511  | 3.359287 | -2.512227 |
| C | 0.916035  | 3.699443 | -3.610320 |
| H | 2.914186  | 4.132539 | -4.305452 |
| H | -0.941096 | 3.216882 | -2.628609 |
| H | 0.452575  | 3.827218 | -4.583441 |
| S | -0.710249 | 3.825172 | 0.968527  |
| O | 0.412187  | 4.536770 | 1.590985  |
| O | -1.628834 | 3.042884 | 1.808313  |
| C | -1.648337 | 5.038178 | 0.018960  |
| H | -0.951983 | 5.549730 | -0.646111 |
| H | -2.079597 | 5.738637 | 0.735555  |
| H | -2.423470 | 4.528629 | -0.552023 |
| N | -0.114235 | 2.719707 | -0.165787 |
| H | -0.913176 | 2.159084 | -0.493316 |

Vibrational frequencies

|         |         |         |
|---------|---------|---------|
| 12.8544 | 18.5585 | 21.3581 |
| 23.5384 | 28.7136 | 32.6603 |
| 37.7187 | 38.9240 | 39.8785 |

|         |         |         |
|---------|---------|---------|
| 42.2024 | 43.0770 | 47.0192 |
| 48.9549 | 51.2586 | 54.1642 |
| 56.5810 | 58.8119 | 60.3124 |
| 63.1108 | 64.9220 | 66.4927 |
| 73.1565 | 75.2764 | 79.5580 |
| 80.8720 | 86.9228 | 89.0377 |
| 94.0817 | 95.9783 | 97.7300 |

## TS2S

Cartesian coordinates

|   |           |           |           |
|---|-----------|-----------|-----------|
| C | -1.209364 | -2.632341 | 1.933611  |
| C | -1.489494 | -1.458737 | 1.232585  |
| C | -2.500425 | -0.592088 | 1.643558  |
| C | -3.241774 | -0.924613 | 2.778455  |
| C | -2.961012 | -2.097998 | 3.491668  |
| C | -1.940498 | -2.957941 | 3.076050  |
| C | -0.107214 | -3.418099 | 1.267530  |
| C | 0.455367  | -2.449529 | 0.191505  |
| C | -0.600656 | -1.315804 | 0.016664  |
| H | -2.700568 | 0.320549  | 1.097474  |
| H | -4.037240 | -0.264706 | 3.110620  |
| H | -3.540933 | -2.340468 | 4.377336  |
| H | -1.727195 | -3.867711 | 3.630224  |
| H | 0.656066  | -3.758682 | 1.972831  |
| H | 0.642164  | -2.939810 | -0.757225 |
| H | -0.504632 | -4.306033 | 0.764948  |
| S | -2.197777 | -2.696695 | -1.807184 |
| O | -1.385073 | -3.902715 | -1.570571 |
| O | -2.599306 | -2.333175 | -3.174703 |
| C | -3.694547 | -2.857509 | -0.837837 |
| C | -3.772236 | -3.833765 | 0.156587  |

|   |           |           |           |
|---|-----------|-----------|-----------|
| C | -4.756070 | -1.985484 | -1.082812 |
| C | -4.929570 | -3.924499 | 0.923579  |
| H | -2.940788 | -4.507454 | 0.321032  |
| C | -5.906266 | -2.095304 | -0.304996 |
| H | -4.685758 | -1.227763 | -1.855470 |
| C | -6.008855 | -3.053997 | 0.712064  |
| H | -4.993431 | -4.678772 | 1.702619  |
| H | -6.729632 | -1.410146 | -0.482013 |
| C | -7.233759 | -3.125547 | 1.589251  |
| H | -8.107523 | -2.690612 | 1.096730  |
| H | -7.469600 | -4.157624 | 1.865058  |
| H | -7.068774 | -2.569535 | 2.520331  |
| N | -1.302945 | -1.383070 | -1.287469 |
| H | -1.831314 | -0.521133 | -1.467840 |
| S | 2.133532  | -1.844187 | 0.758473  |
| C | 3.218676  | -2.486715 | -0.495681 |
| C | 4.328946  | -3.261431 | -0.101657 |
| C | 3.009883  | -2.143278 | -1.854356 |
| C | 5.200157  | -3.719087 | -1.095543 |
| C | 3.886749  | -2.638731 | -2.828031 |
| C | 4.973370  | -3.416370 | -2.437398 |
| H | 6.055335  | -4.324445 | -0.812738 |
| H | 3.735503  | -2.412528 | -3.874849 |
| H | 5.653883  | -3.790671 | -3.196178 |
| C | 4.595101  | -3.595166 | 1.346382  |
| H | 4.784099  | -2.690185 | 1.932858  |
| H | 3.741567  | -4.103010 | 1.805965  |
| H | 5.469703  | -4.243081 | 1.435578  |
| O | 1.964406  | -1.322744 | -2.097547 |
| C | 1.703305  | -0.820788 | -3.438317 |

|   |           |           |           |
|---|-----------|-----------|-----------|
| C | 0.951739  | 0.487028  | -3.250497 |
| C | 0.913422  | -1.850789 | -4.237851 |
| H | 2.669255  | -0.613805 | -3.915598 |
| H | 1.540481  | 1.199396  | -2.669804 |
| H | 0.734667  | 0.934268  | -4.224236 |
| H | 0.008001  | 0.310157  | -2.732505 |
| H | -0.076471 | -1.987742 | -3.797612 |
| H | 0.790361  | -1.502427 | -5.267990 |
| H | 1.424921  | -2.816614 | -4.262114 |
| H | -0.124853 | -0.332353 | -0.019089 |
| O | -2.567916 | 1.182808  | -1.182632 |
| S | -3.821174 | 1.805544  | -1.732317 |
| O | -4.547128 | 0.948033  | -2.685488 |
| O | -3.648114 | 3.225715  | -2.109644 |
| C | -4.926269 | 1.896966  | -0.231971 |
| F | -4.378752 | 2.697814  | 0.697216  |
| F | -6.124035 | 2.389370  | -0.571905 |
| F | -5.099354 | 0.685264  | 0.316000  |
| S | 2.402924  | 0.719665  | 0.638323  |
| C | 4.084028  | 0.478372  | 0.128920  |
| C | 4.462171  | 0.632915  | -1.212396 |
| C | 5.036202  | 0.074223  | 1.078813  |
| C | 5.772131  | 0.367351  | -1.595621 |
| H | 3.729331  | 0.952931  | -1.943595 |
| C | 6.340164  | -0.201432 | 0.678172  |
| H | 4.738857  | -0.044839 | 2.116186  |
| C | 6.725308  | -0.073743 | -0.664625 |
| H | 6.056574  | 0.480429  | -2.637792 |
| H | 7.067107  | -0.532234 | 1.414535  |
| C | 8.117193  | -0.445208 | -1.107445 |

|   |           |           |           |
|---|-----------|-----------|-----------|
| H | 8.440389  | 0.153962  | -1.963261 |
| H | 8.144729  | -1.497673 | -1.415571 |
| H | 8.844068  | -0.320129 | -0.300336 |
| C | 2.585714  | -0.815992 | 4.522760  |
| C | 2.985355  | 0.513031  | 4.382514  |
| C | 2.073042  | 1.500468  | 3.981301  |
| C | 0.744796  | 1.132688  | 3.743196  |
| C | 0.337378  | -0.194910 | 3.897146  |
| C | 1.256289  | -1.173642 | 4.278383  |
| H | 3.307024  | -1.569521 | 4.826673  |
| H | 4.018529  | 0.788488  | 4.583506  |
| H | 0.024176  | 1.879105  | 3.421919  |
| H | -0.696274 | -0.462371 | 3.716641  |
| H | 0.935409  | -2.205397 | 4.387058  |
| C | 2.537164  | 2.924636  | 3.772354  |
| C | 3.497321  | 3.086973  | 2.567032  |
| H | 1.681300  | 3.588375  | 3.624868  |
| H | 3.081201  | 3.273945  | 4.657608  |
| C | 2.850081  | 2.909661  | 1.262239  |
| H | 4.339412  | 2.390481  | 2.649571  |
| H | 3.920145  | 4.098818  | 2.571004  |
| C | 2.304863  | 3.188779  | 0.191043  |
| C | 1.672095  | 3.511996  | -1.030936 |
| C | 2.439305  | 3.972418  | -2.120071 |
| C | 0.273363  | 3.338712  | -1.183432 |
| C | 1.830943  | 4.250528  | -3.338995 |
| H | 3.509297  | 4.094770  | -1.992161 |
| C | -0.323803 | 3.622884  | -2.413264 |
| C | 0.452165  | 4.070907  | -3.483846 |
| H | 2.428369  | 4.600395  | -4.174098 |

|   |           |          |           |
|---|-----------|----------|-----------|
| H | -1.393680 | 3.481409 | -2.524534 |
| H | -0.026295 | 4.283243 | -4.434525 |
| S | -1.018998 | 3.781167 | 1.151579  |
| O | 0.132062  | 4.527305 | 1.675771  |
| O | -1.781611 | 2.890833 | 2.036127  |
| C | -2.136687 | 4.975648 | 0.397332  |
| H | -1.560036 | 5.564112 | -0.317191 |
| H | -2.514913 | 5.609702 | 1.200577  |
| H | -2.943235 | 4.441894 | -0.103291 |
| N | -0.491681 | 2.789775 | -0.115770 |
| H | -1.283529 | 2.213813 | -0.442439 |

Vibrational frequencies

|           |         |         |
|-----------|---------|---------|
| -196.7066 | 14.6968 | 20.2533 |
| 24.5417   | 28.5190 | 28.7166 |
| 33.2427   | 35.8511 | 38.0783 |
| 38.8501   | 41.7585 | 46.6848 |
| 49.3590   | 50.1763 | 52.7159 |
| 55.9207   | 58.8043 | 60.2317 |
| 62.8357   | 65.5090 | 67.6853 |
| 71.0456   | 72.6351 | 75.0356 |
| 78.3441   | 81.9990 | 91.2141 |
| 91.8757   | 92.4020 | 95.5801 |

**TS2R**

Cartesian coordinates

|   |          |           |           |
|---|----------|-----------|-----------|
| C | 0.379600 | -3.404689 | -0.360335 |
| C | 0.876032 | -2.101727 | -0.282311 |
| C | 1.734749 | -1.594457 | -1.255987 |
| C | 2.090992 | -2.421192 | -2.323400 |
| C | 1.590000 | -3.726670 | -2.411314 |
| C | 0.732384 | -4.228312 | -1.429025 |



|   |           |           |           |
|---|-----------|-----------|-----------|
| C | -0.504906 | -3.722139 | 0.820281  |
| C | -0.746789 | -2.340516 | 1.485914  |
| C | 0.368306  | -1.391349 | 0.954742  |
| H | 2.124307  | -0.585486 | -1.173389 |
| H | 2.759129  | -2.046708 | -3.091391 |
| H | 1.872960  | -4.355171 | -3.250729 |
| H | 0.342344  | -5.239493 | -1.500994 |
| H | -1.431675 | -4.228380 | 0.536240  |
| H | -0.744902 | -2.380338 | 2.573182  |
| H | 0.019174  | -4.365881 | 1.532346  |
| S | 2.448543  | -2.167120 | 2.622926  |
| O | 1.689914  | -3.388030 | 2.942672  |
| O | 3.149089  | -1.428986 | 3.684563  |
| C | 3.652060  | -2.560787 | 1.360406  |
| C | 3.619912  | -3.792661 | 0.710020  |
| C | 4.554884  | -1.564973 | 0.984862  |
| C | 4.499922  | -4.016420 | -0.346064 |
| H | 2.905524  | -4.547915 | 1.014244  |
| C | 5.417916  | -1.801649 | -0.079571 |
| H | 4.568662  | -0.616090 | 1.502078  |
| C | 5.396557  | -3.024195 | -0.767504 |
| H | 4.475238  | -4.970098 | -0.865080 |
| H | 6.106130  | -1.017946 | -0.383204 |
| C | 6.285112  | -3.252397 | -1.964687 |
| H | 6.578011  | -4.302488 | -2.053527 |
| H | 5.756686  | -2.982274 | -2.887533 |
| H | 7.191794  | -2.643184 | -1.915718 |
| N | 1.376338  | -1.059254 | 1.982784  |
| H | 1.895323  | -0.208169 | 1.735236  |
| S | -2.479805 | -1.791407 | 1.029678  |

|   |           |           |           |
|---|-----------|-----------|-----------|
| C | -3.154648 | -1.162971 | 2.551693  |
| C | -4.370355 | -1.719049 | 3.005533  |
| C | -2.502995 | -0.138681 | 3.278204  |
| C | -4.875028 | -1.288425 | 4.236603  |
| C | -3.019176 | 0.248026  | 4.523460  |
| C | -4.194401 | -0.333315 | 4.990793  |
| H | -5.801448 | -1.714495 | 4.607618  |
| H | -2.520585 | 1.001289  | 5.118004  |
| H | -4.589191 | -0.024974 | 5.954004  |
| C | -5.130737 | -2.747309 | 2.201841  |
| H | -5.413466 | -2.352817 | 1.219985  |
| H | -4.532789 | -3.646954 | 2.025948  |
| H | -6.044062 | -3.039847 | 2.724239  |
| O | -1.415692 | 0.406864  | 2.696079  |
| C | -0.790047 | 1.598724  | 3.259652  |
| C | -0.189791 | 2.327288  | 2.071835  |
| C | 0.229717  | 1.211959  | 4.324509  |
| H | -1.580266 | 2.218190  | 3.698751  |
| H | -0.958668 | 2.613705  | 1.352997  |
| H | 0.333508  | 3.228005  | 2.401695  |
| H | 0.531213  | 1.685729  | 1.565777  |
| H | 1.025203  | 0.604646  | 3.890660  |
| H | 0.671066  | 2.116936  | 4.752453  |
| H | -0.234940 | 0.640677  | 5.132788  |
| H | -0.047619 | -0.415826 | 0.704340  |
| S | -2.291423 | -0.092989 | -0.891369 |
| C | -2.726555 | -1.422758 | -1.996494 |
| C | -1.732730 | -2.125406 | -2.692355 |
| C | -4.076599 | -1.762941 | -2.172722 |
| C | -2.095430 | -3.148018 | -3.564027 |

|   |           |           |           |
|---|-----------|-----------|-----------|
| H | -0.688560 | -1.875338 | -2.549405 |
| C | -4.422575 | -2.793336 | -3.042867 |
| H | -4.841314 | -1.229216 | -1.616817 |
| C | -3.440676 | -3.498055 | -3.756464 |
| H | -1.317360 | -3.692053 | -4.091910 |
| H | -5.468874 | -3.057160 | -3.169042 |
| C | -3.821280 | -4.590993 | -4.723266 |
| H | -3.059653 | -5.375173 | -4.758669 |
| H | -4.777553 | -5.048660 | -4.455944 |
| H | -3.922159 | -4.189183 | -5.738954 |
| O | 2.737899  | 3.536098  | 0.441436  |
| S | 3.315972  | 2.360833  | 1.154945  |
| O | 2.757563  | 1.064146  | 0.672845  |
| O | 3.443404  | 2.496302  | 2.614450  |
| C | 5.071054  | 2.310334  | 0.520905  |
| F | 5.676332  | 3.486757  | 0.718717  |
| F | 5.776585  | 1.356297  | 1.153984  |
| F | 5.088638  | 2.034268  | -0.795564 |
| C | -5.893666 | 1.177353  | 0.973662  |
| C | -5.706507 | 1.634334  | -0.329911 |
| C | -4.673386 | 2.532852  | -0.633843 |
| C | -3.835641 | 2.975726  | 0.395317  |
| C | -4.032219 | 2.529071  | 1.704257  |
| C | -5.056707 | 1.628685  | 1.997366  |
| H | -6.693128 | 0.475903  | 1.195367  |
| H | -6.366267 | 1.289771  | -1.123418 |
| H | -3.024964 | 3.664357  | 0.172209  |
| H | -3.381476 | 2.884610  | 2.496607  |
| H | -5.197449 | 1.273098  | 3.011247  |
| C | -4.451144 | 2.970248  | -2.062220 |

|   |           |           |           |
|---|-----------|-----------|-----------|
| C | -3.930393 | 1.825837  | -2.961485 |
| H | -3.741284 | 3.800703  | -2.107946 |
| H | -5.394283 | 3.317008  | -2.500099 |
| C | -2.555844 | 1.403376  | -2.651290 |
| H | -4.596406 | 0.958011  | -2.902489 |
| H | -3.924314 | 2.154738  | -4.007325 |
| C | -1.334790 | 1.345899  | -2.830050 |
| C | 0.055431  | 1.288693  | -3.050141 |
| C | 0.560741  | 0.472354  | -4.084692 |
| C | 0.953186  | 2.046590  | -2.256358 |
| C | 1.927704  | 0.401494  | -4.319848 |
| H | -0.136549 | -0.103577 | -4.682795 |
| C | 2.324835  | 1.958052  | -2.500175 |
| C | 2.807959  | 1.136663  | -3.519177 |
| H | 2.308241  | -0.230672 | -5.114725 |
| H | 3.006056  | 2.527826  | -1.882524 |
| H | 3.878266  | 1.076641  | -3.688471 |
| S | -0.217863 | 4.352427  | -1.476836 |
| O | -1.028875 | 4.268643  | -2.697652 |
| O | -0.832461 | 4.774293  | -0.212126 |
| C | 1.204392  | 5.409733  | -1.800087 |
| H | 1.706973  | 5.033938  | -2.692425 |
| H | 0.831078  | 6.421655  | -1.963005 |
| H | 1.862394  | 5.359849  | -0.932179 |
| N | 0.456331  | 2.822095  | -1.176406 |
| H | 1.155152  | 2.932557  | -0.429916 |

Vibrational frequencies

|           |         |         |
|-----------|---------|---------|
| -220.6519 | 11.0810 | 19.8079 |
| 22.4681   | 26.0517 | 27.8365 |
| 32.9345   | 34.9775 | 37.2791 |

|         |         |         |
|---------|---------|---------|
| 40.1044 | 41.0421 | 43.1690 |
| 46.4957 | 47.8868 | 48.5232 |
| 50.7270 | 52.9820 | 54.5051 |
| 56.3508 | 58.9344 | 63.4570 |
| 67.7035 | 68.1403 | 72.5587 |
| 73.1524 | 74.4120 | 81.0989 |
| 89.0178 | 93.7604 | 95.2443 |

## TS2'S

Cartesian coordinates

|   |           |           |           |
|---|-----------|-----------|-----------|
| C | -2.900627 | 2.886337  | -1.594294 |
| C | -2.559432 | 1.658587  | -1.016567 |
| C | -3.183442 | 0.476924  | -1.415915 |
| C | -4.148213 | 0.533689  | -2.422689 |
| C | -4.488229 | 1.759835  | -3.008242 |
| C | -3.872049 | 2.944790  | -2.594038 |
| C | -2.110573 | 4.013334  | -0.968603 |
| C | -0.955408 | 3.275593  | -0.249947 |
| C | -1.474638 | 1.835594  | 0.030113  |
| H | -2.944056 | -0.462174 | -0.934348 |
| H | -4.634737 | -0.381715 | -2.745340 |
| H | -5.240301 | 1.791834  | -3.791607 |
| H | -4.141798 | 3.894103  | -3.048574 |
| H | -1.765685 | 4.760934  | -1.688017 |
| H | -0.585565 | 3.759440  | 0.648768  |
| H | -2.715168 | 4.526376  | -0.213969 |
| S | -3.247540 | 2.123821  | 2.164677  |
| O | -3.447136 | 3.534500  | 1.796904  |
| O | -3.096992 | 1.738518  | 3.576756  |
| C | -4.593704 | 1.161625  | 1.485101  |
| C | -5.545638 | 1.773547  | 0.672311  |

|   |           |           |           |
|---|-----------|-----------|-----------|
| C | -4.619985 | -0.214634 | 1.727347  |
| C | -6.531263 | 0.987738  | 0.079723  |
| H | -5.493585 | 2.840165  | 0.489671  |
| C | -5.612897 | -0.981097 | 1.126352  |
| H | -3.869532 | -0.687169 | 2.350842  |
| C | -6.572069 | -0.397898 | 0.283807  |
| H | -7.267934 | 1.455939  | -0.566527 |
| H | -5.640447 | -2.050869 | 1.311609  |
| C | -7.589289 | -1.251401 | -0.430653 |
| H | -7.827833 | -2.155675 | 0.136370  |
| H | -8.517285 | -0.703377 | -0.615717 |
| H | -7.195253 | -1.568869 | -1.403997 |
| N | -1.839573 | 1.605998  | 1.441508  |
| H | -1.680634 | 0.626198  | 1.682226  |
| S | 0.478345  | 3.195481  | -1.463702 |
| C | 1.894756  | 3.956362  | -0.714540 |
| C | 2.707968  | 4.741117  | -1.568267 |
| C | 2.293593  | 3.688656  | 0.621129  |
| C | 3.898916  | 5.265955  | -1.061982 |
| C | 3.493306  | 4.238907  | 1.093298  |
| C | 4.284435  | 5.014261  | 0.252526  |
| H | 4.527121  | 5.872346  | -1.706457 |
| H | 3.821612  | 4.052185  | 2.106002  |
| H | 5.214688  | 5.425086  | 0.632862  |
| C | 2.336729  | 5.002377  | -3.009088 |
| H | 2.343357  | 4.078151  | -3.598328 |
| H | 1.334027  | 5.430914  | -3.098816 |
| H | 3.048611  | 5.693123  | -3.465993 |
| O | 1.485943  | 2.885439  | 1.355597  |
| C | 1.767590  | 2.669610  | 2.770911  |

|   |           |           |           |
|---|-----------|-----------|-----------|
| C | 0.973422  | 1.447999  | 3.200595  |
| C | 1.379525  | 3.911612  | 3.569227  |
| H | 2.837558  | 2.452858  | 2.870555  |
| H | 1.164294  | 0.591164  | 2.553175  |
| H | 1.259140  | 1.177255  | 4.221418  |
| H | -0.096092 | 1.658620  | 3.182644  |
| H | 0.306321  | 4.095054  | 3.459400  |
| H | 1.595686  | 3.753155  | 4.629800  |
| H | 1.918642  | 4.802254  | 3.238599  |
| H | -0.675119 | 1.108873  | -0.109102 |
| S | 1.188497  | 0.632704  | -1.760780 |
| C | 2.820694  | 0.860137  | -1.128943 |
| C | 3.819028  | 1.414505  | -1.944288 |
| C | 3.122348  | 0.509271  | 0.197165  |
| C | 5.091314  | 1.639532  | -1.427177 |
| H | 3.590756  | 1.675752  | -2.972189 |
| C | 4.403036  | 0.716651  | 0.691956  |
| H | 2.353536  | 0.071074  | 0.818496  |
| C | 5.402834  | 1.299697  | -0.103485 |
| H | 5.854018  | 2.084416  | -2.059586 |
| H | 4.630592  | 0.428802  | 1.714376  |
| C | 6.766261  | 1.588102  | 0.468474  |
| H | 7.535133  | 1.603753  | -0.308722 |
| H | 6.769456  | 2.571632  | 0.954530  |
| H | 7.048705  | 0.849000  | 1.223421  |
| O | -0.691516 | -3.508464 | 0.913719  |
| S | -0.569021 | -2.105492 | 1.365832  |
| O | -1.621611 | -1.190355 | 0.849490  |
| O | 0.805365  | -1.542301 | 1.302281  |
| C | -0.967392 | -2.137590 | 3.184931  |

|   |           |           |           |
|---|-----------|-----------|-----------|
| F | -0.121628 | -2.911963 | 3.865158  |
| F | -0.911229 | -0.886963 | 3.677950  |
| F | -2.218478 | -2.597744 | 3.362549  |
| C | -4.581753 | -3.207225 | -1.674994 |
| C | -3.194298 | -3.218276 | -1.526478 |
| C | -2.358040 | -3.249835 | -2.652797 |
| C | -2.941887 | -3.261315 | -3.926232 |
| C | -4.330475 | -3.248749 | -4.076792 |
| C | -5.155361 | -3.222964 | -2.949681 |
| H | -5.215828 | -3.184423 | -0.794968 |
| H | -2.748009 | -3.191421 | -0.537402 |
| H | -2.303563 | -3.280229 | -4.806327 |
| H | -4.766510 | -3.262091 | -5.071570 |
| H | -6.235643 | -3.221418 | -3.063300 |
| C | -0.855304 | -3.183496 | -2.484665 |
| C | -0.429427 | -1.710722 | -2.316000 |
| H | -0.345453 | -3.618341 | -3.350379 |
| H | -0.547895 | -3.735649 | -1.592439 |
| C | 1.018047  | -1.512108 | -2.071491 |
| H | -0.721475 | -1.128227 | -3.197959 |
| H | -0.966593 | -1.277516 | -1.468727 |
| C | 2.162061  | -1.997882 | -1.954054 |
| C | 3.514622  | -2.285400 | -1.795220 |
| C | 4.386204  | -2.104016 | -2.904449 |
| C | 4.050339  | -2.719381 | -0.538819 |
| C | 5.738645  | -2.356349 | -2.788607 |
| H | 3.959518  | -1.753565 | -3.837618 |
| C | 5.426357  | -2.964833 | -0.448374 |
| C | 6.250422  | -2.792970 | -1.556131 |
| H | 6.398998  | -2.209342 | -3.635969 |



|   |          |           |           |
|---|----------|-----------|-----------|
| H | 5.840399 | -3.273038 | 0.501382  |
| H | 7.314465 | -2.980852 | -1.452403 |
| S | 3.128239 | -4.265354 | 1.517110  |
| O | 4.458727 | -4.884359 | 1.548566  |
| O | 2.467332 | -3.876849 | 2.763950  |
| C | 2.021014 | -5.318767 | 0.572033  |
| H | 2.453076 | -5.463441 | -0.419130 |
| H | 1.949444 | -6.270226 | 1.102081  |
| H | 1.050173 | -4.821380 | 0.526885  |
| N | 3.227528 | -2.845796 | 0.587532  |
| H | 2.319321 | -2.361021 | 0.596884  |

Vibrational frequencies

|           |         |         |
|-----------|---------|---------|
| -164.6682 | 17.3651 | 20.3998 |
| 21.0605   | 27.0532 | 27.5071 |
| 30.5479   | 31.8322 | 34.3706 |
| 36.4176   | 40.4045 | 41.6620 |
| 41.8820   | 46.1620 | 52.2909 |
| 55.1856   | 57.1395 | 57.9614 |
| 62.8167   | 65.2920 | 67.3302 |
| 69.8692   | 71.5803 | 72.1409 |
| 76.2885   | 76.8806 | 82.5755 |
| 85.5246   | 86.3991 | 91.9862 |

**TS2'R**

Cartesian coordinates

|   |           |           |          |
|---|-----------|-----------|----------|
| C | -2.929371 | -2.562640 | 1.668090 |
| C | -2.623041 | -1.434658 | 0.901183 |
| C | -3.408111 | -0.284462 | 0.972756 |
| C | -4.501553 | -0.272229 | 1.839756 |
| C | -4.799446 | -1.393085 | 2.625124 |
| C | -4.016588 | -2.547028 | 2.542115 |

|   |           |           |           |
|---|-----------|-----------|-----------|
| C | -1.985852 | -3.699571 | 1.359306  |
| C | -0.819468 | -3.005436 | 0.611810  |
| C | -1.396878 | -1.675225 | 0.038007  |
| H | -3.172740 | 0.576486  | 0.360122  |
| H | -5.125382 | 0.614352  | 1.906042  |
| H | -5.649744 | -1.366566 | 3.300633  |
| H | -4.254157 | -3.419573 | 3.144365  |
| H | -1.661025 | -4.250879 | 2.245853  |
| H | -0.362065 | -3.610385 | -0.166686 |
| H | -2.460972 | -4.412213 | 0.678894  |
| S | -2.755672 | -2.682080 | -2.178132 |
| O | -2.634450 | -4.038772 | -1.619010 |
| O | -2.541935 | -2.459480 | -3.615431 |
| C | -4.378848 | -2.053853 | -1.758084 |
| C | -5.214380 | -2.799580 | -0.927919 |
| C | -4.750671 | -0.787570 | -2.215225 |
| C | -6.440218 | -2.261000 | -0.546678 |
| H | -4.898551 | -3.775150 | -0.578675 |
| C | -5.978035 | -0.265101 | -1.817876 |
| H | -4.082417 | -0.210752 | -2.844715 |
| C | -6.835288 | -0.985797 | -0.973915 |
| H | -7.092732 | -2.833026 | 0.106740  |
| H | -6.263370 | 0.727604  | -2.152839 |
| C | -8.131865 | -0.385079 | -0.491223 |
| H | -8.912059 | -1.144906 | -0.387436 |
| H | -7.993243 | 0.075373  | 0.494909  |
| H | -8.494091 | 0.392082  | -1.169581 |
| N | -1.616480 | -1.722885 | -1.425389 |
| H | -1.631262 | -0.798094 | -1.860304 |
| S | 0.515045  | -2.675467 | 1.883573  |

|   |           |           |           |
|---|-----------|-----------|-----------|
| C | 2.004607  | -3.379185 | 1.198047  |
| C | 2.776116  | -4.234369 | 2.012137  |
| C | 2.468853  | -2.973361 | -0.078911 |
| C | 4.009694  | -4.681876 | 1.525443  |
| C | 3.706014  | -3.446831 | -0.539687 |
| C | 4.465160  | -4.287424 | 0.269336  |
| H | 4.613517  | -5.341385 | 2.140634  |
| H | 4.091982  | -3.149855 | -1.505436 |
| H | 5.429578  | -4.630399 | -0.092127 |
| C | 2.313824  | -4.657863 | 3.386553  |
| H | 2.249289  | -3.803687 | 4.069513  |
| H | 1.319216  | -5.113104 | 3.351781  |
| H | 3.008910  | -5.381179 | 3.818823  |
| O | 1.672173  | -2.117333 | -0.760321 |
| C | 2.113279  | -1.550038 | -2.029440 |
| C | 1.458183  | -0.185631 | -2.147672 |
| C | 1.734852  | -2.500168 | -3.158818 |
| H | 3.197735  | -1.412832 | -1.982728 |
| H | 1.634101  | 0.413265  | -1.253383 |
| H | 1.881661  | 0.353315  | -2.998387 |
| H | 0.384697  | -0.284821 | -2.300105 |
| H | 0.647930  | -2.619903 | -3.188214 |
| H | 2.068615  | -2.091947 | -4.117712 |
| H | 2.194605  | -3.483389 | -3.024617 |
| H | -0.669644 | -0.868202 | 0.135131  |
| S | 1.547723  | -0.233210 | 1.813547  |
| C | 0.467624  | 0.599180  | 2.936915  |
| C | -0.689355 | 1.221363  | 2.441984  |
| C | 0.746775  | 0.640702  | 4.314227  |
| C | -1.557011 | 1.864878  | 3.318457  |

|   |           |           |           |
|---|-----------|-----------|-----------|
| H | -0.898058 | 1.209328  | 1.380624  |
| C | -0.120248 | 1.305333  | 5.174321  |
| H | 1.637615  | 0.153562  | 4.697214  |
| C | -1.284849 | 1.927235  | 4.691469  |
| H | -2.455861 | 2.331440  | 2.926466  |
| H | 0.101146  | 1.338352  | 6.237478  |
| C | -2.201694 | 2.676763  | 5.623844  |
| H | -2.156307 | 2.278660  | 6.641173  |
| H | -1.913802 | 3.734405  | 5.671921  |
| H | -3.239316 | 2.637449  | 5.280723  |
| O | -1.225425 | 1.486405  | -0.741942 |
| S | -1.576728 | 1.962000  | -2.099229 |
| O | -1.973788 | 0.889610  | -3.041914 |
| O | -0.627040 | 2.970198  | -2.653357 |
| C | -3.130274 | 2.953907  | -1.832239 |
| F | -2.892103 | 3.961002  | -0.975095 |
| F | -3.575548 | 3.465283  | -2.984827 |
| F | -4.093057 | 2.174946  | -1.307681 |
| C | 7.342446  | -2.161008 | -1.082685 |
| C | 6.903136  | -1.134187 | -0.244903 |
| C | 6.014324  | -0.158240 | -0.714646 |
| C | 5.585052  | -0.221445 | -2.048240 |
| C | 6.023568  | -1.247726 | -2.888637 |
| C | 6.898756  | -2.224535 | -2.406404 |
| H | 8.028809  | -2.912186 | -0.702382 |
| H | 7.243492  | -1.095546 | 0.787030  |
| H | 4.896046  | 0.533430  | -2.419006 |
| H | 5.679019  | -1.285253 | -3.918168 |
| H | 7.237424  | -3.024724 | -3.057811 |
| C | 5.419470  | 0.872088  | 0.218990  |

|   |           |           |           |
|---|-----------|-----------|-----------|
| C | 4.307637  | 0.197588  | 1.063931  |
| H | 4.990823  | 1.695402  | -0.354038 |
| H | 6.176994  | 1.298601  | 0.884345  |
| C | 3.202350  | 1.094849  | 1.471364  |
| H | 3.855761  | -0.602942 | 0.467537  |
| H | 4.722535  | -0.298811 | 1.947946  |
| C | 2.703987  | 2.236877  | 1.555179  |
| C | 1.805706  | 3.304977  | 1.598806  |
| C | 1.433964  | 3.905741  | 2.824042  |
| C | 1.114595  | 3.655482  | 0.401076  |
| C | 0.356667  | 4.776024  | 2.869889  |
| H | 1.970441  | 3.632764  | 3.725106  |
| C | 0.011172  | 4.506218  | 0.473110  |
| C | -0.365755 | 5.052528  | 1.700129  |
| H | 0.056276  | 5.220213  | 3.812440  |
| H | -0.547548 | 4.726267  | -0.429192 |
| H | -1.225358 | 5.713909  | 1.742255  |
| S | 2.949789  | 3.563789  | -1.570467 |
| O | 3.907875  | 3.937691  | -0.521974 |
| O | 3.296192  | 2.520539  | -2.541406 |
| C | 2.472088  | 5.044681  | -2.477183 |
| H | 2.126137  | 5.787049  | -1.756684 |
| H | 3.351686  | 5.402641  | -3.014069 |
| H | 1.675525  | 4.770235  | -3.170161 |
| N | 1.515647  | 3.076444  | -0.816989 |
| H | 0.762405  | 2.966869  | -1.514049 |

Vibrational frequencies

|           |         |         |
|-----------|---------|---------|
| -150.1060 | 11.4747 | 15.7926 |
| 18.9576   | 20.7086 | 25.2815 |
| 27.9494   | 29.7893 | 33.9599 |

|         |         |         |
|---------|---------|---------|
| 34.4135 | 35.8784 | 38.7909 |
| 39.5048 | 42.4591 | 45.9083 |
| 48.9131 | 53.0564 | 54.0473 |
| 55.2375 | 59.1242 | 60.5184 |
| 60.9095 | 64.7132 | 66.8100 |
| 68.2748 | 70.2371 | 71.8722 |
| 74.6757 | 76.2236 | 78.4254 |

## Int2S

Cartesian coordinates

|   |           |           |           |
|---|-----------|-----------|-----------|
| C | -1.286974 | -2.629363 | 2.087079  |
| C | -1.478200 | -1.492749 | 1.297847  |
| C | -2.388027 | -0.502057 | 1.662470  |
| C | -3.123631 | -0.671015 | 2.837469  |
| C | -2.933481 | -1.806036 | 3.636929  |
| C | -2.010271 | -2.790011 | 3.269466  |
| C | -0.285711 | -3.566033 | 1.455315  |
| C | 0.363225  | -2.725034 | 0.322596  |
| C | -0.609772 | -1.533973 | 0.058729  |
| H | -2.518133 | 0.380747  | 1.050535  |
| H | -3.840890 | 0.088061  | 3.134837  |
| H | -3.505551 | -1.920691 | 4.553227  |
| H | -1.865804 | -3.668868 | 3.891960  |
| H | 0.451350  | -3.946888 | 2.167161  |
| H | 0.516413  | -3.304478 | -0.583037 |
| H | -0.793871 | -4.430987 | 1.015259  |
| S | -2.344668 | -2.903869 | -1.652718 |
| O | -1.643331 | -4.156454 | -1.323345 |
| O | -2.720847 | -2.613448 | -3.045478 |
| C | -3.847345 | -2.855376 | -0.679237 |
| C | -3.985063 | -3.696018 | 0.426363  |

|   |           |           |           |
|---|-----------|-----------|-----------|
| C | -4.847790 | -1.946451 | -1.026481 |
| C | -5.138483 | -3.610809 | 1.200012  |
| H | -3.201977 | -4.401862 | 0.672666  |
| C | -5.996456 | -1.880131 | -0.241327 |
| H | -4.726418 | -1.293755 | -1.884062 |
| C | -6.156275 | -2.698656 | 0.884779  |
| H | -5.247332 | -4.257269 | 2.066087  |
| H | -6.771780 | -1.164854 | -0.499280 |
| C | -7.375763 | -2.576241 | 1.764341  |
| H | -8.228278 | -2.166533 | 1.215861  |
| H | -7.666725 | -3.544050 | 2.183261  |
| H | -7.172827 | -1.904455 | 2.607502  |
| N | -1.350132 | -1.636515 | -1.224165 |
| H | -1.807578 | -0.750125 | -1.461671 |
| S | 2.051469  | -2.134310 | 0.845409  |
| C | 3.086216  | -2.721464 | -0.491164 |
| C | 4.155428  | -3.595606 | -0.213612 |
| C | 2.872569  | -2.253585 | -1.809663 |
| C | 4.974705  | -4.020085 | -1.268092 |
| C | 3.693598  | -2.709967 | -2.850024 |
| C | 4.737166  | -3.589303 | -2.569988 |
| H | 5.795792  | -4.700066 | -1.061939 |
| H | 3.532670  | -2.381402 | -3.867962 |
| H | 5.369943  | -3.937029 | -3.381296 |
| C | 4.444858  | -4.069616 | 1.190180  |
| H | 4.719358  | -3.232142 | 1.840588  |
| H | 3.568287  | -4.544769 | 1.640936  |
| H | 5.270714  | -4.785481 | 1.193754  |
| O | 1.864824  | -1.354295 | -1.968646 |
| C | 1.583754  | -0.792996 | -3.274872 |

|   |           |           |           |
|---|-----------|-----------|-----------|
| C | 0.875248  | 0.527048  | -3.016754 |
| C | 0.745012  | -1.759899 | -4.105288 |
| H | 2.539833  | -0.583556 | -3.772135 |
| H | 1.489322  | 1.174742  | -2.388922 |
| H | 0.689135  | 1.045751  | -3.961168 |
| H | -0.082853 | 0.369311  | -2.518706 |
| H | -0.228514 | -1.908557 | -3.633624 |
| H | 0.592150  | -1.350562 | -5.108945 |
| H | 1.236930  | -2.731002 | -4.203548 |
| H | -0.046305 | -0.606828 | -0.067999 |
| O | -2.323055 | 1.110562  | -1.272277 |
| S | -3.530206 | 1.733057  | -1.918652 |
| O | -4.226674 | 0.842269  | -2.862301 |
| O | -3.296873 | 3.127148  | -2.359919 |
| C | -4.725810 | 1.932075  | -0.496007 |
| F | -4.318684 | 2.906736  | 0.332888  |
| F | -5.939604 | 2.250603  | -0.964813 |
| F | -4.823970 | 0.798944  | 0.211926  |
| S | 2.481273  | 1.212870  | 0.763643  |
| C | 4.038197  | 0.568756  | 0.149193  |
| C | 4.370593  | 0.666200  | -1.203129 |
| C | 4.863052  | -0.115312 | 1.047841  |
| C | 5.539772  | 0.061761  | -1.656478 |
| H | 3.726747  | 1.196637  | -1.895448 |
| C | 6.027493  | -0.713189 | 0.573017  |
| H | 4.586332  | -0.196848 | 2.094573  |
| C | 6.377844  | -0.645629 | -0.782914 |
| H | 5.795050  | 0.124246  | -2.709929 |
| H | 6.667264  | -1.253306 | 1.264698  |
| C | 7.599219  | -1.360499 | -1.299709 |



|   |           |           |           |
|---|-----------|-----------|-----------|
| H | 8.028931  | -0.849682 | -2.165869 |
| H | 7.324425  | -2.373810 | -1.614245 |
| H | 8.370625  | -1.448561 | -0.529752 |
| C | 2.743778  | -0.495957 | 4.512958  |
| C | 3.069848  | 0.856236  | 4.399395  |
| C | 2.100815  | 1.797784  | 4.020646  |
| C | 0.794491  | 1.358589  | 3.773737  |
| C | 0.462573  | 0.006395  | 3.897119  |
| C | 1.436968  | -0.924129 | 4.258723  |
| H | 3.506654  | -1.213808 | 4.800655  |
| H | 4.087586  | 1.183532  | 4.599921  |
| H | 0.035066  | 2.068834  | 3.460704  |
| H | -0.551694 | -0.318221 | 3.699371  |
| H | 1.179556  | -1.975761 | 4.337705  |
| C | 2.480343  | 3.248108  | 3.805801  |
| C | 3.460604  | 3.444420  | 2.619247  |
| H | 1.587974  | 3.847397  | 3.614512  |
| H | 2.977392  | 3.654460  | 4.693579  |
| C | 2.928698  | 2.928070  | 1.344053  |
| H | 4.412844  | 2.941686  | 2.820823  |
| H | 3.669790  | 4.508894  | 2.470611  |
| C | 2.418023  | 3.034227  | 0.176798  |
| C | 1.876220  | 3.593210  | -1.031090 |
| C | 2.710626  | 4.174016  | -1.998229 |
| C | 0.493276  | 3.445484  | -1.275339 |
| C | 2.166510  | 4.598340  | -3.208246 |
| H | 3.772453  | 4.270234  | -1.800142 |
| C | -0.038030 | 3.865415  | -2.495601 |
| C | 0.801179  | 4.431877  | -3.457625 |
| H | 2.808387  | 5.045908  | -3.959310 |

|   |           |          |           |
|---|-----------|----------|-----------|
| H | -1.099294 | 3.732646 | -2.682119 |
| H | 0.382472  | 4.750567 | -4.406708 |
| S | -0.913621 | 3.747684 | 0.993491  |
| O | 0.217419  | 4.455816 | 1.610320  |
| O | -1.728075 | 2.827210 | 1.795292  |
| C | -1.975216 | 4.984627 | 0.228966  |
| H | -1.344969 | 5.632734 | -0.380526 |
| H | -2.439345 | 5.549926 | 1.038404  |
| H | -2.720805 | 4.477654 | -0.382137 |
| N | -0.309696 | 2.812747 | -0.284181 |
| H | -1.064033 | 2.212013 | -0.659427 |

Vibrational frequencies

|         |         |         |
|---------|---------|---------|
| 17.2786 | 19.6616 | 20.9490 |
| 27.4828 | 30.2783 | 34.0956 |
| 36.4156 | 39.7365 | 42.2465 |
| 42.7847 | 46.1468 | 49.0663 |
| 52.3311 | 53.4700 | 56.8382 |
| 58.6129 | 61.9180 | 62.9182 |
| 67.1401 | 67.3341 | 73.8254 |
| 75.4664 | 80.1441 | 81.9470 |
| 84.0143 | 86.9389 | 90.4344 |
| 91.6672 | 92.5726 | 97.0761 |

**Int2R**

Cartesian coordinates

|   |          |           |           |
|---|----------|-----------|-----------|
| C | 0.213975 | -3.182548 | -1.249825 |
| C | 0.706713 | -1.969271 | -0.763638 |
| C | 1.584217 | -1.189642 | -1.517998 |
| C | 1.965365 | -1.647957 | -2.781350 |
| C | 1.469283 | -2.861379 | -3.276523 |
| C | 0.592774 | -3.636636 | -2.513341 |

|   |           |           |           |
|---|-----------|-----------|-----------|
| C | -0.689095 | -3.849850 | -0.242060 |
| C | -0.928960 | -2.758463 | 0.838652  |
| C | 0.194740  | -1.694703 | 0.635395  |
| H | 1.981199  | -0.263245 | -1.116497 |
| H | 2.653291  | -1.061136 | -3.379847 |
| H | 1.773894  | -3.204495 | -4.261137 |
| H | 0.210301  | -4.576987 | -2.900381 |
| H | -1.621380 | -4.209232 | -0.687226 |
| H | -0.905564 | -3.158720 | 1.850289  |
| H | -0.185105 | -4.707945 | 0.212171  |
| S | 2.283300  | -2.971487 | 1.956504  |
| O | 1.515813  | -4.224787 | 1.875788  |
| O | 2.993905  | -2.616486 | 3.194865  |
| C | 3.489914  | -2.966425 | 0.634669  |
| C | 3.441918  | -3.927213 | -0.373810 |
| C | 4.424049  | -1.930467 | 0.603483  |
| C | 4.334697  | -3.828128 | -1.438103 |
| H | 2.707514  | -4.722142 | -0.331605 |
| C | 5.298523  | -1.838408 | -0.474172 |
| H | 4.453584  | -1.199820 | 1.398634  |
| C | 5.260714  | -2.777928 | -1.514904 |
| H | 4.297587  | -4.567313 | -2.233040 |
| H | 6.008951  | -1.017454 | -0.507711 |
| C | 6.163419  | -2.639300 | -2.715428 |
| H | 6.465001  | -3.615516 | -3.106348 |
| H | 5.642760  | -2.111977 | -3.524592 |
| H | 7.065175  | -2.068308 | -2.478077 |
| N | 1.222099  | -1.706338 | 1.705114  |
| H | 1.755698  | -0.829951 | 1.720724  |
| S | -2.628074 | -2.033037 | 0.587658  |

|   |           |           |           |
|---|-----------|-----------|-----------|
| C | -3.287027 | -1.853002 | 2.240659  |
| C | -4.463507 | -2.550274 | 2.585018  |
| C | -2.705121 | -0.942605 | 3.155835  |
| C | -5.034606 | -2.334720 | 3.846895  |
| C | -3.281074 | -0.766763 | 4.421821  |
| C | -4.443809 | -1.458978 | 4.753519  |
| H | -5.940326 | -2.868174 | 4.118682  |
| H | -2.838454 | -0.092434 | 5.142773  |
| H | -4.886896 | -1.311456 | 5.733988  |
| C | -5.131273 | -3.505746 | 1.624052  |
| H | -5.508477 | -2.984100 | 0.737759  |
| H | -4.429399 | -4.264537 | 1.265604  |
| H | -5.974097 | -4.008988 | 2.104522  |
| O | -1.616846 | -0.262529 | 2.716473  |
| C | -0.948095 | 0.708173  | 3.563917  |
| C | -0.248735 | 1.661496  | 2.609653  |
| C | 0.001839  | 0.000991  | 4.525843  |
| H | -1.706883 | 1.267637  | 4.124807  |
| H | -0.964593 | 2.161866  | 1.955890  |
| H | 0.301913  | 2.422880  | 3.168049  |
| H | 0.465583  | 1.121511  | 1.987795  |
| H | 0.739841  | -0.578081 | 3.966952  |
| H | 0.524690  | 0.737942  | 5.142592  |
| H | -0.539313 | -0.681157 | 5.187171  |
| H | -0.226617 | -0.693274 | 0.724298  |
| S | -2.103447 | 0.807402  | -1.299390 |
| C | -2.657228 | -0.456991 | -2.446043 |
| C | -1.733456 | -1.178901 | -3.202787 |
| C | -4.024007 | -0.753334 | -2.494747 |
| C | -2.195007 | -2.199328 | -4.032632 |

|   |           |           |           |
|---|-----------|-----------|-----------|
| H | -0.671680 | -0.970500 | -3.136829 |
| C | -4.462183 | -1.777776 | -3.328618 |
| H | -4.726600 | -0.206208 | -1.874361 |
| C | -3.558175 | -2.514270 | -4.110780 |
| H | -1.474816 | -2.770737 | -4.609770 |
| H | -5.521234 | -2.016354 | -3.366240 |
| C | -4.049765 | -3.608989 | -5.024148 |
| H | -3.260506 | -4.333068 | -5.242651 |
| H | -4.897383 | -4.142742 | -4.584900 |
| H | -4.388204 | -3.190949 | -5.979889 |
| O | 2.836638  | 3.136482  | 1.401506  |
| S | 3.318644  | 1.795569  | 1.846733  |
| O | 2.713017  | 0.682839  | 1.061862  |
| O | 3.387840  | 1.592402  | 3.301955  |
| C | 5.097693  | 1.793106  | 1.278599  |
| F | 5.736171  | 2.878502  | 1.729725  |
| F | 5.739776  | 0.702158  | 1.731019  |
| F | 5.162484  | 1.784276  | -0.065990 |
| C | -5.847901 | 1.120939  | 0.501961  |
| C | -5.486809 | 2.095145  | -0.431108 |
| C | -4.422135 | 2.972127  | -0.176084 |
| C | -3.745488 | 2.872510  | 1.045740  |
| C | -4.114949 | 1.906105  | 1.983892  |
| C | -5.157857 | 1.019468  | 1.713811  |
| H | -6.668260 | 0.442799  | 0.284371  |
| H | -6.032228 | 2.168734  | -1.369283 |
| H | -2.913732 | 3.540528  | 1.250085  |
| H | -3.580923 | 1.835953  | 2.924726  |
| H | -5.422670 | 0.254819  | 2.436831  |
| C | -3.965765 | 3.965907  | -1.223821 |

|   |           |          |           |
|---|-----------|----------|-----------|
| C | -3.436311 | 3.292054 | -2.514178 |
| H | -3.174597 | 4.602577 | -0.821637 |
| H | -4.793392 | 4.616713 | -1.527229 |
| C | -2.300826 | 2.380254 | -2.275285 |
| H | -4.232598 | 2.723403 | -3.006910 |
| H | -3.079538 | 4.051656 | -3.216626 |
| C | -1.074268 | 2.039082 | -2.383467 |
| C | 0.326845  | 2.083734 | -2.688800 |
| C | 0.817364  | 1.625237 | -3.920135 |
| C | 1.214662  | 2.536920 | -1.688398 |
| C | 2.190535  | 1.606720 | -4.149054 |
| H | 0.122341  | 1.276861 | -4.675973 |
| C | 2.589403  | 2.496138 | -1.924015 |
| C | 3.070903  | 2.023256 | -3.146061 |
| H | 2.573649  | 1.251511 | -5.099489 |
| H | 3.268762  | 2.823976 | -1.147420 |
| H | 4.142051  | 1.988784 | -3.316342 |
| S | 0.043032  | 4.550097 | -0.343236 |
| O | -0.630410 | 4.848350 | -1.615329 |
| O | -0.712967 | 4.602379 | 0.913299  |
| C | 1.488097  | 5.612736 | -0.192500 |
| H | 2.084936  | 5.497805 | -1.098280 |
| H | 1.128575  | 6.637742 | -0.091972 |
| H | 2.048160  | 5.294399 | 0.686771  |
| N | 0.676807  | 2.971781 | -0.447186 |
| H | 1.335325  | 2.845897 | 0.335254  |

Vibrational frequencies

|         |         |         |
|---------|---------|---------|
| 18.7706 | 23.2446 | 24.4254 |
| 24.6252 | 26.0144 | 28.6609 |
| 32.9149 | 34.6733 | 36.6783 |

|         |         |         |
|---------|---------|---------|
| 37.4504 | 39.2750 | 40.7384 |
| 45.0454 | 45.9633 | 51.4574 |
| 54.7719 | 55.6437 | 56.4884 |
| 60.0917 | 64.2960 | 65.9905 |
| 67.1533 | 69.6993 | 72.1766 |
| 73.7762 | 78.8581 | 83.1669 |
| 88.3554 | 91.1543 | 94.7733 |

### TS3S

Cartesian coordinates

|   |           |           |           |
|---|-----------|-----------|-----------|
| C | -0.912970 | -2.611325 | 2.357601  |
| C | -1.193858 | -1.522864 | 1.529263  |
| C | -2.090639 | -0.527898 | 1.915216  |
| C | -2.743948 | -0.659977 | 3.146225  |
| C | -2.489165 | -1.761875 | 3.970219  |
| C | -1.565788 | -2.743745 | 3.581990  |
| C | 0.111854  | -3.523747 | 1.731388  |
| C | 0.634975  | -2.725103 | 0.505991  |
| C | -0.423061 | -1.607108 | 0.229301  |
| H | -2.276097 | 0.323685  | 1.278434  |
| H | -3.447576 | 0.101374  | 3.458552  |
| H | -3.000540 | -1.849185 | 4.921393  |
| H | -1.361501 | -3.587182 | 4.237759  |
| H | 0.914039  | -3.790383 | 2.423064  |
| H | 0.766510  | -3.347753 | -0.375220 |
| H | -0.357644 | -4.452580 | 1.388131  |
| S | -2.216309 | -3.147389 | -1.277409 |
| O | -1.589245 | -4.310392 | -0.613169 |
| O | -2.413876 | -3.164499 | -2.733995 |
| C | -3.825698 | -2.877610 | -0.544559 |
| C | -4.043034 | -3.173560 | 0.805972  |

|   |           |           |           |
|---|-----------|-----------|-----------|
| C | -4.836165 | -2.328587 | -1.335939 |
| C | -5.284253 | -2.886501 | 1.365710  |
| H | -3.253161 | -3.610957 | 1.404013  |
| C | -6.070870 | -2.050310 | -0.753624 |
| H | -4.649358 | -2.094158 | -2.372936 |
| C | -6.308830 | -2.305856 | 0.602338  |
| H | -5.455418 | -3.097578 | 2.416462  |
| H | -6.846514 | -1.591511 | -1.357488 |
| C | -7.612967 | -1.891091 | 1.231416  |
| H | -8.471210 | -2.215009 | 0.631532  |
| H | -7.730790 | -2.290756 | 2.244398  |
| H | -7.663890 | -0.790167 | 1.288103  |
| N | -1.240318 | -1.819567 | -0.985343 |
| H | -1.742876 | -0.967588 | -1.256581 |
| S | 2.308983  | -1.998330 | 0.897161  |
| C | 3.329493  | -2.577057 | -0.453349 |
| C | 4.509504  | -3.283907 | -0.177982 |
| C | 2.994737  | -2.238527 | -1.791228 |
| C | 5.319519  | -3.699228 | -1.238442 |
| C | 3.810724  | -2.695107 | -2.841816 |
| C | 4.963911  | -3.413223 | -2.556113 |
| H | 6.230514  | -4.253369 | -1.029172 |
| H | 3.549454  | -2.482317 | -3.866187 |
| H | 5.586611  | -3.760156 | -3.376956 |
| C | 4.933727  | -3.593844 | 1.241143  |
| H | 5.145617  | -2.674704 | 1.798001  |
| H | 4.140134  | -4.123957 | 1.789654  |
| H | 5.834268  | -4.212787 | 1.249033  |
| O | 1.900328  | -1.455838 | -1.959000 |
| C | 1.519647  | -0.997198 | -3.280159 |



|   |           |           |           |
|---|-----------|-----------|-----------|
| C | 0.725627  | 0.278043  | -3.078798 |
| C | 0.730999  | -2.077029 | -4.006003 |
| H | 2.441393  | -0.754865 | -3.831935 |
| H | 1.317714  | 1.014408  | -2.525131 |
| H | 0.460366  | 0.716149  | -4.049530 |
| H | -0.192886 | 0.087920  | -2.526423 |
| H | -0.198496 | -2.284259 | -3.474469 |
| H | 0.487443  | -1.742960 | -5.022776 |
| H | 1.298843  | -3.008558 | -4.087334 |
| H | 0.089149  | -0.664400 | 0.004850  |
| O | -2.471110 | 0.844435  | -1.161826 |
| S | -3.803921 | 1.322191  | -1.680973 |
| O | -4.462917 | 0.398040  | -2.617935 |
| O | -3.784696 | 2.753053  | -2.064633 |
| C | -4.866105 | 1.310618  | -0.136620 |
| F | -4.588031 | 2.389668  | 0.639279  |
| F | -6.179027 | 1.349497  | -0.475569 |
| F | -4.638096 | 0.199443  | 0.590560  |
| S | 2.409571  | 1.296435  | 0.453751  |
| C | 4.057489  | 0.793147  | -0.033031 |
| C | 4.380247  | 0.623674  | -1.382860 |
| C | 4.974017  | 0.454451  | 0.968293  |
| C | 5.623501  | 0.109638  | -1.727608 |
| H | 3.659609  | 0.869135  | -2.158656 |
| C | 6.210220  | -0.065673 | 0.603162  |
| H | 4.706864  | 0.569868  | 2.014764  |
| C | 6.548684  | -0.262995 | -0.744561 |
| H | 5.865546  | -0.044693 | -2.775479 |
| H | 6.916255  | -0.343284 | 1.378171  |
| C | 7.850599  | -0.915583 | -1.124821 |

|   |           |           |           |
|---|-----------|-----------|-----------|
| H | 8.250713  | -0.495269 | -2.058841 |
| H | 7.695398  | -1.986721 | -1.286352 |
| H | 8.605593  | -0.803179 | -0.341292 |
| C | 3.216750  | 0.056104  | 4.570640  |
| C | 3.298041  | 1.409137  | 4.238434  |
| C | 2.180250  | 2.099143  | 3.760722  |
| C | 0.958848  | 1.412927  | 3.647145  |
| C | 0.870790  | 0.062403  | 3.994454  |
| C | 2.000213  | -0.621663 | 4.452272  |
| H | 4.098075  | -0.466354 | 4.938541  |
| H | 4.244148  | 1.934422  | 4.348663  |
| H | 0.081273  | 1.929253  | 3.267905  |
| H | -0.077216 | -0.453065 | 3.910510  |
| H | 1.932275  | -1.675293 | 4.705851  |
| C | 2.294016  | 3.544772  | 3.326932  |
| C | 3.188297  | 3.737760  | 2.082270  |
| H | 1.307146  | 3.957111  | 3.105447  |
| H | 2.734083  | 4.143610  | 4.127336  |
| C | 2.651944  | 3.083128  | 0.857576  |
| H | 4.190684  | 3.331572  | 2.265903  |
| H | 3.296414  | 4.802132  | 1.851412  |
| C | 2.113831  | 3.263599  | -0.279781 |
| C | 1.442360  | 3.574632  | -1.486172 |
| C | 2.160125  | 4.009102  | -2.617379 |
| C | 0.050870  | 3.320311  | -1.570265 |
| C | 1.494461  | 4.194575  | -3.823427 |
| H | 3.227914  | 4.186099  | -2.537539 |
| C | -0.597429 | 3.499749  | -2.792387 |
| C | 0.120543  | 3.934685  | -3.905063 |
| H | 2.042252  | 4.534502  | -4.693427 |

|   |           |          |           |
|---|-----------|----------|-----------|
| H | -1.662688 | 3.296619 | -2.859372 |
| H | -0.395869 | 4.066576 | -4.850377 |
| S | -1.126381 | 3.829139 | 0.797514  |
| O | -0.004298 | 4.723264 | 1.111550  |
| O | -1.685630 | 2.945524 | 1.832988  |
| C | -2.443475 | 4.839663 | 0.108590  |
| H | -2.016576 | 5.416476 | -0.710780 |
| H | -2.789568 | 5.500584 | 0.905545  |
| H | -3.233243 | 4.186343 | -0.246476 |
| N | -0.632296 | 2.798391 | -0.448954 |
| H | -1.373374 | 2.108063 | -0.677230 |

Vibrational frequencies

|          |         |          |
|----------|---------|----------|
| -67.6782 | 20.1324 | 23.3579  |
| 23.9678  | 25.8828 | 31.8482  |
| 32.9034  | 35.0073 | 40.7273  |
| 43.9702  | 48.0045 | 50.9637  |
| 52.4074  | 56.0594 | 59.4257  |
| 61.5538  | 63.1883 | 64.3096  |
| 66.9271  | 70.3171 | 72.5996  |
| 76.3641  | 81.0538 | 83.2724  |
| 86.2518  | 88.6665 | 89.6248  |
| 96.5489  | 99.3653 | 106.0947 |

**TS3R**

Cartesian coordinates

|   |           |           |          |
|---|-----------|-----------|----------|
| C | -0.277549 | -3.435146 | 0.436198 |
| C | -0.727787 | -2.124120 | 0.267960 |
| C | -1.617792 | -1.542041 | 1.171345 |
| C | -2.053975 | -2.300438 | 2.260025 |
| C | -1.599573 | -3.614215 | 2.438219 |
| C | -0.710379 | -4.189842 | 1.527220 |

|   |           |           |           |
|---|-----------|-----------|-----------|
| C | 0.641299  | -3.845875 | -0.688599 |
| C | 0.932443  | -2.522913 | -1.453528 |
| C | -0.162154 | -1.508802 | -0.994248 |
| H | -1.982197 | -0.532943 | 1.010419  |
| H | -2.752269 | -1.870079 | 2.969889  |
| H | -1.947008 | -4.191670 | 3.290170  |
| H | -0.361206 | -5.208858 | 1.668331  |
| H | 1.552570  | -4.333446 | -0.330666 |
| H | 0.908240  | -2.653640 | -2.533398 |
| H | 0.132981  | -4.546163 | -1.358488 |
| S | -2.231053 | -2.314079 | -2.670081 |
| O | -1.489552 | -3.562112 | -2.914759 |
| O | -2.889673 | -1.613069 | -3.783448 |
| C | -3.483682 | -2.637385 | -1.433311 |
| C | -3.473952 | -3.827858 | -0.708899 |
| C | -4.406768 | -1.628673 | -1.156341 |
| C | -4.396589 | -3.994164 | 0.320946  |
| H | -2.744830 | -4.595483 | -0.937368 |
| C | -5.311919 | -1.805687 | -0.115210 |
| H | -4.403976 | -0.715273 | -1.733202 |
| C | -5.313803 | -2.984280 | 0.645195  |
| H | -4.389513 | -4.915010 | 0.896745  |
| H | -6.014037 | -1.009278 | 0.113258  |
| C | -6.250315 | -3.146933 | 1.816536  |
| H | -6.562028 | -4.188135 | 1.940440  |
| H | -5.753477 | -2.843339 | 2.746556  |
| H | -7.145427 | -2.528888 | 1.705640  |
| N | -1.157100 | -1.196595 | -2.048697 |
| H | -1.674669 | -0.336149 | -1.838389 |
| S | 2.658021  | -1.957328 | -1.028698 |

|   |           |           |           |
|---|-----------|-----------|-----------|
| C | 3.325979  | -1.330733 | -2.566943 |
| C | 4.518067  | -1.899084 | -3.064049 |
| C | 2.731385  | -0.230241 | -3.231053 |
| C | 5.084298  | -1.374044 | -4.233349 |
| C | 3.296569  | 0.246047  | -4.423151 |
| C | 4.470228  | -0.323127 | -4.909487 |
| H | 6.001212  | -1.808213 | -4.620088 |
| H | 2.839752  | 1.065254  | -4.961775 |
| H | 4.905722  | 0.061046  | -5.827206 |
| C | 5.203872  | -3.050891 | -2.365988 |
| H | 5.546042  | -2.770787 | -1.363856 |
| H | 4.525498  | -3.900182 | -2.239082 |
| H | 6.073706  | -3.382858 | -2.938284 |
| O | 1.637545  | 0.312163  | -2.643487 |
| C | 1.022489  | 1.512404  | -3.185311 |
| C | 0.355015  | 2.196443  | -2.005293 |
| C | 0.053750  | 1.152179  | -4.307960 |
| H | 1.817029  | 2.165690  | -3.561135 |
| H | 1.087196  | 2.460937  | -1.242041 |
| H | -0.145647 | 3.111399  | -2.333098 |
| H | -0.397064 | 1.546374  | -1.559144 |
| H | -0.745539 | 0.512902  | -3.929372 |
| H | -0.389313 | 2.063512  | -4.721028 |
| H | 0.562133  | 0.619939  | -5.116553 |
| H | 0.292318  | -0.537662 | -0.800791 |
| S | 2.214276  | 0.154436  | 1.470701  |
| C | 2.618824  | -1.284429 | 2.458492  |
| C | 1.587497  | -2.073189 | 2.976595  |
| C | 3.957675  | -1.644180 | 2.659215  |
| C | 1.903971  | -3.213882 | 3.711407  |

|   |           |           |           |
|---|-----------|-----------|-----------|
| H | 0.551110  | -1.808659 | 2.805716  |
| C | 4.254541  | -2.787760 | 3.394668  |
| H | 4.757923  | -1.047265 | 2.235672  |
| C | 3.235438  | -3.590422 | 3.932015  |
| H | 1.097156  | -3.824379 | 4.105211  |
| H | 5.293194  | -3.065013 | 3.550572  |
| C | 3.568610  | -4.847892 | 4.694887  |
| H | 2.769935  | -5.117431 | 5.391053  |
| H | 3.703046  | -5.690525 | 4.005931  |
| H | 4.498802  | -4.738366 | 5.259630  |
| O | -2.758283 | 3.448557  | -0.531837 |
| S | -3.250863 | 2.280665  | -1.323290 |
| O | -2.670716 | 0.988558  | -0.861504 |
| O | -3.309703 | 2.477135  | -2.779615 |
| C | -5.033735 | 2.153954  | -0.784080 |
| F | -5.656378 | 3.327806  | -0.937057 |
| F | -5.684664 | 1.228333  | -1.509458 |
| F | -5.108701 | 1.793708  | 0.511214  |
| C | 4.977425  | 1.745071  | -1.675333 |
| C | 5.167043  | 1.542404  | -0.309444 |
| C | 4.568381  | 2.386938  | 0.637309  |
| C | 3.749053  | 3.427715  | 0.182725  |
| C | 3.557134  | 3.635030  | -1.185304 |
| C | 4.179472  | 2.803077  | -2.116754 |
| H | 5.428155  | 1.067041  | -2.393336 |
| H | 5.781867  | 0.712340  | 0.029523  |
| H | 3.239315  | 4.078085  | 0.885545  |
| H | 2.901884  | 4.436357  | -1.510691 |
| H | 4.031233  | 2.960570  | -3.180193 |
| C | 4.831805  | 2.165500  | 2.114675  |

|   |           |           |          |
|---|-----------|-----------|----------|
| C | 3.620068  | 2.351774  | 3.041327 |
| H | 5.606052  | 2.859989  | 2.462650 |
| H | 5.244525  | 1.162648  | 2.262402 |
| C | 2.423170  | 1.542703  | 2.669782 |
| H | 3.899723  | 2.085264  | 4.066526 |
| H | 3.277488  | 3.390848  | 3.063246 |
| C | 1.166388  | 1.446321  | 2.858564 |
| C | -0.210174 | 1.413158  | 3.121365 |
| C | -0.711049 | 0.639497  | 4.192724 |
| C | -1.103575 | 2.089560  | 2.247216 |
| C | -2.080169 | 0.524980  | 4.379071 |
| H | -0.012321 | 0.129883  | 4.846414 |
| C | -2.478332 | 1.947102  | 2.441966 |
| C | -2.957344 | 1.165685  | 3.493721 |
| H | -2.468514 | -0.070302 | 5.197711 |
| H | -3.162073 | 2.444609  | 1.766995 |
| H | -4.029408 | 1.063651  | 3.627828 |
| S | 0.101981  | 4.366688  | 1.449215 |
| O | 0.920985  | 4.277065  | 2.667135 |
| O | 0.707904  | 4.780975  | 0.182422 |
| C | -1.319249 | 5.420275  | 1.782715 |
| H | -1.808003 | 5.057367  | 2.687815 |
| H | -0.947701 | 6.436241  | 1.922836 |
| H | -1.986638 | 5.353881  | 0.922545 |
| N | -0.583926 | 2.831132  | 1.163818 |
| H | -1.266089 | 2.936101  | 0.396284 |

Vibrational frequencies

|          |         |         |
|----------|---------|---------|
| -64.5170 | 20.1149 | 22.9396 |
| 23.9946  | 25.6589 | 27.8600 |
| 28.8837  | 31.7643 | 32.6097 |

|         |         |         |
|---------|---------|---------|
| 38.2502 | 39.9807 | 41.8894 |
| 44.2268 | 44.6860 | 48.3797 |
| 53.4276 | 56.0941 | 57.2953 |
| 60.0510 | 62.8693 | 64.2534 |
| 66.0290 | 71.8417 | 72.8181 |
| 74.4089 | 83.1824 | 83.6644 |
| 87.2508 | 89.6784 | 93.8608 |

### Int3S

Cartesian coordinates

|   |           |           |           |
|---|-----------|-----------|-----------|
| C | -1.198320 | -2.793193 | 1.895045  |
| C | -1.396397 | -1.589358 | 1.214720  |
| C | -2.317110 | -0.644825 | 1.665124  |
| C | -3.056171 | -0.927305 | 2.815706  |
| C | -2.863254 | -2.133462 | 3.502971  |
| C | -1.930562 | -3.071822 | 3.049545  |
| C | -0.172496 | -3.650222 | 1.193644  |
| C | 0.471139  | -2.697424 | 0.150231  |
| C | -0.527773 | -1.511472 | -0.021787 |
| H | -2.454824 | 0.288762  | 1.133267  |
| H | -3.782389 | -0.205819 | 3.177455  |
| H | -3.440706 | -2.339349 | 4.399183  |
| H | -1.783431 | -4.004567 | 3.587226  |
| H | 0.563657  | -4.079852 | 1.878291  |
| H | 0.654209  | -3.188021 | -0.800530 |
| H | -0.653590 | -4.483820 | 0.670244  |
| S | -2.208993 | -2.797237 | -1.855092 |
| O | -1.415736 | -4.029302 | -1.709555 |
| O | -2.653525 | -2.358427 | -3.187531 |
| C | -3.676054 | -2.982891 | -0.842913 |
| C | -3.742477 | -4.009849 | 0.100093  |



|   |           |           |           |
|---|-----------|-----------|-----------|
| C | -4.725427 | -2.076672 | -1.000481 |
| C | -4.873093 | -4.117148 | 0.904387  |
| H | -2.924430 | -4.712588 | 0.193935  |
| C | -5.848315 | -2.201843 | -0.185470 |
| H | -4.666957 | -1.282815 | -1.737089 |
| C | -5.937162 | -3.211683 | 0.782137  |
| H | -4.927623 | -4.911974 | 1.642944  |
| H | -6.660940 | -1.490251 | -0.294557 |
| C | -7.130468 | -3.304326 | 1.700053  |
| H | -8.005912 | -2.807304 | 1.273804  |
| H | -7.392613 | -4.345019 | 1.912082  |
| H | -6.911454 | -2.822531 | 2.661017  |
| N | -1.278401 | -1.528587 | -1.302831 |
| H | -1.778868 | -0.646606 | -1.452971 |
| S | 2.131431  | -2.105318 | 0.760495  |
| C | 3.226488  | -2.587059 | -0.568142 |
| C | 4.375078  | -3.349738 | -0.278548 |
| C | 2.989376  | -2.131200 | -1.887397 |
| C | 5.246347  | -3.683679 | -1.324360 |
| C | 3.855733  | -2.510648 | -2.920967 |
| C | 4.979298  | -3.281329 | -2.629486 |
| H | 6.130454  | -4.275848 | -1.108722 |
| H | 3.670458  | -2.201063 | -3.941275 |
| H | 5.651121  | -3.565649 | -3.433393 |
| C | 4.696228  | -3.791504 | 1.128841  |
| H | 4.887770  | -2.929049 | 1.776577  |
| H | 3.864540  | -4.345644 | 1.574582  |
| H | 5.585276  | -4.426677 | 1.140754  |
| O | 1.912944  | -1.316369 | -2.050714 |
| C | 1.661524  | -0.681483 | -3.328554 |

|   |           |           |           |
|---|-----------|-----------|-----------|
| C | 0.916461  | 0.608431  | -3.021084 |
| C | 0.873262  | -1.617136 | -4.240070 |
| H | 2.628756  | -0.427157 | -3.781488 |
| H | 1.487323  | 1.222784  | -2.322384 |
| H | 0.761852  | 1.180713  | -3.939680 |
| H | -0.058247 | 0.397149  | -2.579099 |
| H | -0.118108 | -1.800430 | -3.819555 |
| H | 0.755796  | -1.162380 | -5.229210 |
| H | 1.384236  | -2.575654 | -4.362292 |
| H | 0.015061  | -0.565922 | -0.079170 |
| O | -2.478123 | 1.148937  | -1.162834 |
| S | -3.765628 | 1.750881  | -1.656778 |
| O | -4.508032 | 0.899224  | -2.601325 |
| O | -3.631083 | 3.183075  | -2.007968 |
| C | -4.817959 | 1.792316  | -0.117057 |
| F | -4.233983 | 2.566740  | 0.815164  |
| F | -6.026159 | 2.295651  | -0.396518 |
| F | -4.970687 | 0.566159  | 0.400547  |
| S | 2.413164  | 1.143115  | 0.618437  |
| C | 4.082070  | 0.655764  | 0.210406  |
| C | 4.504561  | 0.619480  | -1.122642 |
| C | 4.921762  | 0.194476  | 1.232892  |
| C | 5.762546  | 0.110467  | -1.428628 |
| H | 3.848676  | 0.967588  | -1.912388 |
| C | 6.175085  | -0.316924 | 0.907358  |
| H | 4.580328  | 0.204556  | 2.262848  |
| C | 6.608513  | -0.381703 | -0.425026 |
| H | 6.079720  | 0.064056  | -2.465834 |
| H | 6.818840  | -0.691139 | 1.698800  |
| C | 7.926391  | -1.021674 | -0.777687 |

|   |           |           |           |
|---|-----------|-----------|-----------|
| H | 8.369061  | -0.568183 | -1.669073 |
| H | 7.772391  | -2.085884 | -0.993123 |
| H | 8.644754  | -0.948775 | 0.043649  |
| C | 2.847546  | -0.514959 | 4.618401  |
| C | 2.998013  | 0.856462  | 4.407831  |
| C | 1.931807  | 1.631239  | 3.926601  |
| C | 0.701722  | 1.007328  | 3.686529  |
| C | 0.543812  | -0.362594 | 3.911824  |
| C | 1.617147  | -1.128859 | 4.367024  |
| H | 3.686669  | -1.101290 | 4.982384  |
| H | 3.955288  | 1.330470  | 4.614605  |
| H | -0.131583 | 1.590266  | 3.303564  |
| H | -0.415093 | -0.829192 | 3.724159  |
| H | 1.494438  | -2.196486 | 4.525615  |
| C | 2.126123  | 3.105230  | 3.639120  |
| C | 3.108588  | 3.393587  | 2.477531  |
| H | 1.170148  | 3.580707  | 3.408276  |
| H | 2.536007  | 3.607688  | 4.523017  |
| C | 2.635177  | 2.895530  | 1.153978  |
| H | 4.081080  | 2.930304  | 2.679182  |
| H | 3.264650  | 4.471733  | 2.384559  |
| C | 2.173558  | 3.336796  | 0.047456  |
| C | 1.577756  | 3.739505  | -1.143307 |
| C | 2.358413  | 4.216432  | -2.225199 |
| C | 0.172021  | 3.543995  | -1.306217 |
| C | 1.755622  | 4.480456  | -3.444285 |
| H | 3.423879  | 4.357629  | -2.082062 |
| C | -0.410407 | 3.798931  | -2.546980 |
| C | 0.378876  | 4.260716  | -3.602773 |
| H | 2.347148  | 4.846191  | -4.275633 |

|   |           |          |           |
|---|-----------|----------|-----------|
| H | -1.475034 | 3.632217 | -2.672038 |
| H | -0.088368 | 4.460242 | -4.561983 |
| S | -1.021323 | 3.990309 | 1.069716  |
| O | 0.142701  | 4.811892 | 1.430737  |
| O | -1.622029 | 3.083103 | 2.052277  |
| C | -2.286050 | 5.089680 | 0.415160  |
| H | -1.822520 | 5.701352 | -0.359978 |
| H | -2.630174 | 5.710415 | 1.243854  |
| H | -3.092910 | 4.486149 | 0.002974  |
| N | -0.573670 | 3.007413 | -0.237756 |
| H | -1.342527 | 2.375120 | -0.520394 |

Vibrational frequencies

|         |         |         |
|---------|---------|---------|
| 12.6960 | 23.5952 | 25.4300 |
| 27.8853 | 30.6787 | 32.8486 |
| 36.8922 | 39.5141 | 43.3473 |
| 46.9651 | 47.2555 | 50.9291 |
| 52.0008 | 54.4609 | 57.3814 |
| 59.8643 | 61.1969 | 62.5630 |
| 64.5303 | 65.1105 | 68.6967 |
| 70.2544 | 75.5017 | 77.8926 |
| 80.0056 | 83.8222 | 85.4280 |
| 85.8669 | 91.6114 | 92.9517 |

**Int3R**

Cartesian coordinates

|   |          |           |           |
|---|----------|-----------|-----------|
| C | 0.052292 | -3.441724 | -0.743966 |
| C | 0.588473 | -2.175649 | -0.500194 |
| C | 1.447077 | -1.565081 | -1.414378 |
| C | 1.763182 | -2.247707 | -2.591052 |
| C | 1.216742 | -3.512456 | -2.847285 |
| C | 0.359667 | -4.117825 | -1.925424 |

|   |           |           |           |
|---|-----------|-----------|-----------|
| C | -0.801088 | -3.904928 | 0.410561  |
| C | -0.984558 | -2.631115 | 1.282326  |
| C | 0.143742  | -1.644524 | 0.846293  |
| H | 1.882355  | -0.595263 | -1.194581 |
| H | 2.440678  | -1.799157 | -3.308846 |
| H | 1.469845  | -4.029823 | -3.768448 |
| H | -0.058748 | -5.100334 | -2.125098 |
| H | -1.754141 | -4.332751 | 0.087285  |
| H | -0.926941 | -2.839006 | 2.349290  |
| H | -0.271603 | -4.667305 | 0.989468  |
| S | 2.307770  | -2.693979 | 2.244249  |
| O | 1.550985  | -3.945756 | 2.405474  |
| O | 3.082802  | -2.143788 | 3.367523  |
| C | 3.443292  | -2.900517 | 0.873932  |
| C | 3.368945  | -4.026057 | 0.056452  |
| C | 4.347633  | -1.871241 | 0.608071  |
| C | 4.206413  | -4.105413 | -1.054288 |
| H | 2.654942  | -4.810008 | 0.277354  |
| C | 5.164292  | -1.959207 | -0.513959 |
| H | 4.398701  | -1.011335 | 1.259541  |
| C | 5.099551  | -3.071308 | -1.367060 |
| H | 4.148860  | -4.975838 | -1.701382 |
| H | 5.851492  | -1.146163 | -0.730725 |
| C | 5.937415  | -3.132255 | -2.620221 |
| H | 5.383178  | -2.712390 | -3.469107 |
| H | 6.861504  | -2.557155 | -2.514857 |
| H | 6.198263  | -4.162238 | -2.879463 |
| N | 1.219005  | -1.488892 | 1.855038  |
| H | 1.734752  | -0.610415 | 1.738975  |
| S | -2.687968 | -1.940843 | 0.959150  |

|   |           |           |           |
|---|-----------|-----------|-----------|
| C | -3.283283 | -1.433252 | 2.567543  |
| C | -4.463542 | -2.016134 | 3.072408  |
| C | -2.642413 | -0.391808 | 3.281945  |
| C | -4.976674 | -1.560373 | 4.294969  |
| C | -3.157461 | 0.022047  | 4.518402  |
| C | -4.323764 | -0.560496 | 5.010059  |
| H | -5.884856 | -2.006607 | 4.688264  |
| H | -2.666153 | 0.797967  | 5.090458  |
| H | -4.720442 | -0.227380 | 5.964609  |
| C | -5.199124 | -3.103551 | 2.323976  |
| H | -5.589802 | -2.738620 | 1.368000  |
| H | -4.539669 | -3.945606 | 2.092905  |
| H | -6.041540 | -3.472684 | 2.914243  |
| O | -1.558860 | 0.162946  | 2.688090  |
| C | -0.863688 | 1.285309  | 3.291089  |
| C | -0.227710 | 2.034655  | 2.132462  |
| C | 0.139195  | 0.784501  | 4.325728  |
| H | -1.602533 | 1.941174  | 3.767190  |
| H | -0.986256 | 2.385134  | 1.432239  |
| H | 0.330412  | 2.899545  | 2.500265  |
| H | 0.468602  | 1.393629  | 1.592400  |
| H | 0.853697  | 0.104343  | 3.858693  |
| H | 0.690555  | 1.627365  | 4.751474  |
| H | -0.363517 | 0.249313  | 5.136185  |
| H | -0.259329 | -0.636102 | 0.765119  |
| S | -2.107061 | 0.492258  | -1.276828 |
| C | -2.779275 | -0.782930 | -2.338365 |
| C | -1.918647 | -1.667137 | -2.998779 |
| C | -4.167397 | -0.926644 | -2.454489 |
| C | -2.454193 | -2.685628 | -3.781864 |

|   |           |           |           |
|---|-----------|-----------|-----------|
| H | -0.845511 | -1.569572 | -2.889169 |
| C | -4.685877 | -1.952351 | -3.243270 |
| H | -4.828178 | -0.259258 | -1.911960 |
| C | -3.841628 | -2.843832 | -3.920998 |
| H | -1.781081 | -3.377204 | -4.280476 |
| H | -5.763160 | -2.067505 | -3.324959 |
| C | -4.404198 | -3.939410 | -4.791551 |
| H | -3.820493 | -4.860191 | -4.697789 |
| H | -5.443589 | -4.162276 | -4.537049 |
| H | -4.378224 | -3.645928 | -5.848112 |
| O | 2.993212  | 3.308765  | 0.958621  |
| S | 3.347446  | 2.024607  | 1.643326  |
| O | 2.744393  | 0.837844  | 0.976112  |
| O | 3.281372  | 2.055159  | 3.111306  |
| C | 5.162145  | 1.845636  | 1.241497  |
| F | 5.832377  | 2.958978  | 1.553036  |
| F | 5.692416  | 0.818487  | 1.923330  |
| F | 5.325689  | 1.598974  | -0.074412 |
| C | -5.868206 | 1.294640  | 0.472398  |
| C | -5.439351 | 2.060285  | -0.613554 |
| C | -4.336164 | 2.918172  | -0.496822 |
| C | -3.704781 | 3.031834  | 0.747036  |
| C | -4.141870 | 2.278054  | 1.837901  |
| C | -5.211569 | 1.392271  | 1.702592  |
| H | -6.713293 | 0.621641  | 0.357223  |
| H | -5.958802 | 1.981542  | -1.566088 |
| H | -2.855146 | 3.699140  | 0.850196  |
| H | -3.638462 | 2.368072  | 2.794091  |
| H | -5.522662 | 0.783455  | 2.545693  |
| C | -3.811003 | 3.672099  | -1.699416 |

|   |           |          |           |
|---|-----------|----------|-----------|
| C | -3.272157 | 2.760266 | -2.828018 |
| H | -3.016947 | 4.359372 | -1.397518 |
| H | -4.610511 | 4.274649 | -2.146784 |
| C | -2.093928 | 1.920604 | -2.441849 |
| H | -4.056842 | 2.073506 | -3.166679 |
| H | -2.974183 | 3.374358 | -3.682007 |
| C | -0.846848 | 1.897546 | -2.738165 |
| C | 0.506454  | 1.783491 | -2.969073 |
| C | 0.985574  | 1.037368 | -4.084003 |
| C | 1.432296  | 2.319606 | -2.015055 |
| C | 2.335838  | 0.793447 | -4.220446 |
| H | 0.267154  | 0.657401 | -4.801245 |
| C | 2.791893  | 2.018371 | -2.155108 |
| C | 3.229295  | 1.264479 | -3.238861 |
| H | 2.707540  | 0.226070 | -5.065936 |
| H | 3.493538  | 2.384829 | -1.417584 |
| H | 4.289091  | 1.050575 | -3.333600 |
| S | 0.156123  | 4.535447 | -1.064415 |
| O | -0.376280 | 4.630054 | -2.429706 |
| O | -0.750377 | 4.646032 | 0.080215  |
| C | 1.492412  | 5.723012 | -0.852159 |
| H | 2.179753  | 5.617566 | -1.691903 |
| H | 1.039109  | 6.715205 | -0.838853 |
| H | 1.989990  | 5.502395 | 0.093451  |
| N | 0.974414  | 3.041231 | -0.917393 |
| H | 1.650855  | 3.082823 | -0.132095 |

Vibrational frequencies

|         |         |         |
|---------|---------|---------|
| 5.7690  | 15.9131 | 22.8130 |
| 23.0598 | 25.8318 | 26.2476 |
| 30.8757 | 32.3945 | 35.1374 |



|         |         |         |
|---------|---------|---------|
| 35.7898 | 38.0265 | 39.2103 |
| 40.5904 | 47.9360 | 48.2593 |
| 49.5427 | 55.6556 | 58.9121 |
| 59.1751 | 59.6634 | 64.4989 |
| 67.8551 | 69.5937 | 70.3645 |
| 73.3217 | 76.7660 | 81.5048 |
| 83.9659 | 85.8684 | 88.6717 |

### **TS4S**

Cartesian coordinates

|   |           |           |           |
|---|-----------|-----------|-----------|
| C | -4.151499 | 0.643735  | -2.163266 |
| C | -3.137781 | -0.148816 | -1.617908 |
| C | -2.881991 | -1.432224 | -2.100820 |
| C | -3.658778 | -1.916300 | -3.154714 |
| C | -4.670600 | -1.123433 | -3.712452 |
| C | -4.924487 | 0.159517  | -3.219840 |
| C | -4.260921 | 1.961493  | -1.431701 |
| C | -2.954707 | 2.033640  | -0.598997 |
| C | -2.438667 | 0.566814  | -0.480981 |
| H | -2.105554 | -2.039265 | -1.647160 |
| H | -3.480854 | -2.914795 | -3.543578 |
| H | -5.265787 | -1.511960 | -4.534128 |
| H | -5.714220 | 0.768390  | -3.651801 |
| H | -4.377754 | 2.817884  | -2.100813 |
| H | -3.094508 | 2.477421  | 0.381389  |
| H | -5.122792 | 1.943312  | -0.756051 |
| S | -4.060211 | -0.400190 | 1.562963  |
| O | -4.947613 | 0.758920  | 1.370958  |
| O | -3.727641 | -0.855419 | 2.922051  |
| C | -4.758752 | -1.801903 | 0.695620  |
| C | -5.851803 | -1.625088 | -0.150237 |

|   |           |           |           |
|---|-----------|-----------|-----------|
| C | -4.140434 | -3.047339 | 0.833662  |
| C | -6.326477 | -2.714962 | -0.875547 |
| H | -6.307988 | -0.647148 | -0.245348 |
| C | -4.628029 | -4.123255 | 0.097522  |
| H | -3.286331 | -3.170714 | 1.490266  |
| C | -5.718588 | -3.973395 | -0.772463 |
| H | -7.172864 | -2.581987 | -1.543155 |
| H | -4.150557 | -5.094230 | 0.194684  |
| C | -6.201401 | -5.128526 | -1.614006 |
| H | -5.940315 | -6.091119 | -1.165942 |
| H | -7.285656 | -5.095598 | -1.755472 |
| H | -5.742352 | -5.092759 | -2.609777 |
| N | -2.596782 | -0.037866 | 0.861515  |
| H | -1.961489 | -0.833315 | 0.975096  |
| S | -1.656268 | 3.031214  | -1.492770 |
| C | -1.365298 | 4.461361  | -0.461842 |
| C | -1.322737 | 5.730619  | -1.077504 |
| C | -1.064715 | 4.338556  | 0.919228  |
| C | -1.020911 | 6.859139  | -0.302447 |
| C | -0.799374 | 5.488595  | 1.675574  |
| C | -0.777045 | 6.739370  | 1.061796  |
| H | -0.991592 | 7.835281  | -0.777349 |
| H | -0.598268 | 5.413880  | 2.736009  |
| H | -0.563004 | 7.621379  | 1.658149  |
| C | -1.577024 | 5.899229  | -2.557116 |
| H | -0.810565 | 5.393329  | -3.155214 |
| H | -2.538460 | 5.464870  | -2.848311 |
| H | -1.573203 | 6.957189  | -2.831726 |
| O | -1.032296 | 3.076679  | 1.427644  |
| C | -0.935754 | 2.862031  | 2.859531  |

|   |           |           |           |
|---|-----------|-----------|-----------|
| C | -0.456860 | 1.432016  | 3.049058  |
| C | -2.297208 | 3.115356  | 3.502407  |
| H | -0.180766 | 3.544115  | 3.269135  |
| H | 0.507912  | 1.269323  | 2.566035  |
| H | -0.340666 | 1.226006  | 4.117796  |
| H | -1.187043 | 0.737471  | 2.637635  |
| H | -3.033594 | 2.417930  | 3.091155  |
| H | -2.239149 | 2.962387  | 4.584363  |
| H | -2.642417 | 4.136225  | 3.317215  |
| H | -1.355750 | 0.543994  | -0.608971 |
| S | 0.706502  | -0.571870 | -2.423599 |
| C | 1.330320  | 0.997267  | -1.833275 |
| C | 1.713856  | 1.967242  | -2.763672 |
| C | 1.323208  | 1.297317  | -0.466399 |
| C | 2.074373  | 3.239562  | -2.320832 |
| H | 1.724769  | 1.732770  | -3.823157 |
| C | 1.718657  | 2.559340  | -0.039362 |
| H | 1.013332  | 0.550299  | 0.254453  |
| C | 2.080723  | 3.555421  | -0.955940 |
| H | 2.361497  | 3.995032  | -3.047424 |
| H | 1.727191  | 2.773823  | 1.022329  |
| C | 2.421427  | 4.943682  | -0.477472 |
| H | 3.022792  | 5.487554  | -1.211629 |
| H | 1.504525  | 5.518278  | -0.302192 |
| H | 2.972706  | 4.913509  | 0.467321  |
| O | 1.014110  | -3.875079 | 1.050984  |
| S | 0.328916  | -2.591324 | 1.317329  |
| O | -0.891545 | -2.350359 | 0.506771  |
| O | 1.232816  | -1.410951 | 1.424412  |
| C | -0.329827 | -2.763944 | 3.048887  |

|   |           |           |           |
|---|-----------|-----------|-----------|
| F | 0.677055  | -3.008338 | 3.904823  |
| F | -0.949478 | -1.640847 | 3.423826  |
| F | -1.203587 | -3.779965 | 3.111013  |
| C | 6.262129  | -3.023933 | -1.863082 |
| C | 5.157449  | -3.434770 | -2.587262 |
| C | 3.910368  | -3.587110 | -1.948026 |
| C | 3.820486  | -3.332426 | -0.542361 |
| C | 4.992361  | -3.035107 | 0.197701  |
| C | 6.185745  | -2.834726 | -0.461364 |
| H | 7.209402  | -2.867662 | -2.369038 |
| H | 5.232181  | -3.609568 | -3.655514 |
| H | 2.909241  | -3.579334 | -0.006440 |
| H | 4.925224  | -2.930745 | 1.272859  |
| H | 7.077950  | -2.557615 | 0.089916  |
| C | 2.681414  | -4.042582 | -2.689392 |
| C | 1.460247  | -3.214917 | -2.250343 |
| H | 2.503345  | -5.106027 | -2.490712 |
| H | 2.844580  | -3.933051 | -3.764856 |
| C | 1.916802  | -1.794957 | -1.989043 |
| H | 0.681794  | -3.236009 | -3.017082 |
| H | 1.009049  | -3.605877 | -1.333138 |
| C | 3.110396  | -1.521955 | -1.472678 |
| C | 4.074653  | -0.492519 | -1.379951 |
| C | 4.690737  | -0.054040 | -2.580032 |
| C | 4.441886  | 0.117156  | -0.138331 |
| C | 5.609694  | 0.976747  | -2.579509 |
| H | 4.401219  | -0.545099 | -3.502264 |
| C | 5.388966  | 1.154612  | -0.155927 |
| C | 5.949374  | 1.573042  | -1.356893 |
| H | 6.059486  | 1.317230  | -3.505336 |

|   |          |           |           |
|---|----------|-----------|-----------|
| H | 5.681119 | 1.638521  | 0.764364  |
| H | 6.668393 | 2.386293  | -1.336791 |
| S | 3.984514 | 0.334718  | 2.571407  |
| O | 5.403544 | 0.646009  | 2.789667  |
| O | 2.995498 | 1.407477  | 2.746430  |
| C | 3.520183 | -1.063162 | 3.590835  |
| H | 4.257455 | -1.852988 | 3.449931  |
| H | 3.541461 | -0.694029 | 4.617594  |
| H | 2.519592 | -1.390890 | 3.314149  |
| N | 3.841720 | -0.363950 | 1.021858  |
| H | 2.943861 | -0.854662 | 0.918304  |

Vibrational frequencies

|           |         |         |
|-----------|---------|---------|
| -178.7149 | 15.0861 | 19.6551 |
| 20.7910   | 25.9773 | 27.1318 |
| 29.8378   | 32.1883 | 36.0214 |
| 37.5660   | 42.5481 | 44.9609 |
| 46.7429   | 49.3802 | 52.3340 |
| 54.7241   | 56.0977 | 59.9198 |
| 60.6353   | 63.5853 | 65.4758 |
| 66.5220   | 69.7076 | 70.4421 |
| 74.5459   | 75.8453 | 80.1210 |
| 85.2627   | 86.3933 | 88.7913 |

**TS4R**

Cartesian coordinates

|   |          |          |           |
|---|----------|----------|-----------|
| C | 4.230198 | 1.430732 | -1.539241 |
| C | 2.871221 | 1.538811 | -1.238098 |
| C | 2.123509 | 2.643727 | -1.637827 |
| C | 2.760379 | 3.664083 | -2.343877 |
| C | 4.124922 | 3.566521 | -2.647329 |
| C | 4.866582 | 2.450242 | -2.249692 |

|   |          |           |           |
|---|----------|-----------|-----------|
| C | 4.814961 | 0.153276  | -0.983298 |
| C | 3.585526 | -0.646415 | -0.483535 |
| C | 2.382213 | 0.337169  | -0.461561 |
| H | 1.072343 | 2.712711  | -1.389512 |
| H | 2.195317 | 4.538245  | -2.653640 |
| H | 4.611450 | 4.366860  | -3.197754 |
| H | 5.924039 | 2.379646  | -2.490184 |
| H | 5.401983 | -0.403498 | -1.720106 |
| H | 3.740053 | -1.055296 | 0.507521  |
| H | 5.475904 | 0.373515  | -0.137657 |
| S | 2.741115 | 1.409046  | 2.068760  |
| O | 4.131102 | 0.922133  | 2.032236  |
| O | 1.939117 | 1.262686  | 3.296009  |
| C | 2.744245 | 3.140203  | 1.622371  |
| C | 3.910783 | 3.740353  | 1.151394  |
| C | 1.532970 | 3.833150  | 1.659656  |
| C | 3.853140 | 5.057836  | 0.703568  |
| H | 4.835033 | 3.176373  | 1.118160  |
| C | 1.492750 | 5.143195  | 1.193792  |
| H | 0.628573 | 3.360241  | 2.021355  |
| C | 2.646321 | 5.771755  | 0.702158  |
| H | 4.755372 | 5.531292  | 0.327237  |
| H | 0.543343 | 5.669353  | 1.195428  |
| C | 2.581939 | 7.168207  | 0.135669  |
| H | 2.415987 | 7.131239  | -0.948168 |
| H | 1.761169 | 7.742816  | 0.573490  |
| H | 3.515086 | 7.713941  | 0.303151  |
| N | 1.879242 | 0.578711  | 0.910093  |
| H | 0.909360 | 0.902220  | 0.919859  |
| S | 3.128271 | -2.078306 | -1.568524 |

|   |           |           |           |
|---|-----------|-----------|-----------|
| C | 4.434664  | -3.241038 | -1.177439 |
| C | 5.275230  | -3.736199 | -2.195316 |
| C | 4.585595  | -3.706887 | 0.152967  |
| C | 6.257739  | -4.679920 | -1.863976 |
| C | 5.584403  | -4.638380 | 0.460589  |
| C | 6.411991  | -5.119757 | -0.552096 |
| H | 6.910241  | -5.061495 | -2.643597 |
| H | 5.709598  | -4.993248 | 1.476003  |
| H | 7.182993  | -5.845131 | -0.309398 |
| C | 5.139176  | -3.272912 | -3.626798 |
| H | 4.175562  | -3.568924 | -4.055237 |
| H | 5.189118  | -2.182015 | -3.696968 |
| H | 5.930400  | -3.699389 | -4.248448 |
| O | 3.702480  | -3.216335 | 1.065923  |
| C | 3.960055  | -3.294625 | 2.488580  |
| C | 2.668468  | -2.816871 | 3.139200  |
| C | 5.154673  | -2.425848 | 2.876560  |
| H | 4.138763  | -4.343316 | 2.760278  |
| H | 1.820788  | -3.416476 | 2.796011  |
| H | 2.741235  | -2.897575 | 4.227370  |
| H | 2.487984  | -1.769696 | 2.879099  |
| H | 4.945964  | -1.377573 | 2.643304  |
| H | 5.339594  | -2.512803 | 3.951693  |
| H | 6.062098  | -2.730594 | 2.349744  |
| H | 1.509398  | -0.103247 | -0.951802 |
| O | -3.243751 | 2.030254  | 0.591468  |
| S | -1.886458 | 2.644853  | 0.630298  |
| O | -0.796968 | 1.633262  | 0.664680  |
| O | -1.748667 | 3.767119  | 1.576910  |
| C | -1.690021 | 3.435630  | -1.051014 |

|   |           |           |           |
|---|-----------|-----------|-----------|
| F | -2.800387 | 4.092974  | -1.395344 |
| F | -0.666555 | 4.309481  | -1.022550 |
| F | -1.415599 | 2.511633  | -1.985032 |
| S | -0.155933 | -2.065077 | 0.371929  |
| C | -1.041101 | -1.980778 | -1.183679 |
| C | -1.552369 | -3.136647 | -1.780382 |
| C | -1.222671 | -0.733933 | -1.795647 |
| C | -2.278552 | -3.034503 | -2.966989 |
| H | -1.412293 | -4.101323 | -1.304801 |
| C | -1.945908 | -0.649134 | -2.980747 |
| H | -0.845752 | 0.167119  | -1.325564 |
| C | -2.504370 | -1.791552 | -3.572990 |
| H | -2.697814 | -3.932248 | -3.412557 |
| H | -2.117717 | 0.325856  | -3.422310 |
| C | -3.378464 | -1.662497 | -4.794946 |
| H | -4.362514 | -1.274495 | -4.505298 |
| H | -3.525826 | -2.625036 | -5.292152 |
| H | -2.952762 | -0.960328 | -5.518553 |
| C | -5.355367 | -2.064883 | 3.546176  |
| C | -4.043893 | -2.175488 | 3.979241  |
| C | -3.092074 | -1.213774 | 3.594842  |
| C | -3.513455 | -0.131596 | 2.763444  |
| C | -4.883644 | 0.032508  | 2.439888  |
| C | -5.785001 | -0.949731 | 2.786134  |
| H | -6.073991 | -2.833282 | 3.812886  |
| H | -3.734275 | -3.019406 | 4.586966  |
| H | -2.841054 | 0.691545  | 2.565163  |
| H | -5.182058 | 0.914474  | 1.889226  |
| H | -6.828880 | -0.865914 | 2.502824  |
| C | -1.647672 | -1.283247 | 4.011914  |



|   |           |           |           |
|---|-----------|-----------|-----------|
| C | -0.737787 | -0.908559 | 2.829081  |
| H | -1.469908 | -0.598405 | 4.849760  |
| H | -1.415674 | -2.293044 | 4.361621  |
| C | -1.341726 | -1.453375 | 1.555904  |
| H | 0.274026  | -1.287248 | 2.975553  |
| H | -0.630888 | 0.174675  | 2.707930  |
| C | -2.651113 | -1.476405 | 1.334519  |
| C | -3.637153 | -2.192759 | 0.619847  |
| C | -3.765067 | -3.575762 | 0.917141  |
| C | -4.482780 | -1.607832 | -0.379506 |
| C | -4.667984 | -4.377558 | 0.249130  |
| H | -3.115726 | -3.984483 | 1.683226  |
| C | -5.413246 | -2.438800 | -1.030737 |
| C | -5.493870 | -3.789161 | -0.719542 |
| H | -4.743162 | -5.435182 | 0.475507  |
| H | -6.056458 | -2.025313 | -1.791069 |
| H | -6.220049 | -4.398637 | -1.248971 |
| S | -5.099751 | 0.729860  | -1.807169 |
| O | -5.925064 | -0.106730 | -2.686994 |
| O | -4.071288 | 1.589995  | -2.389545 |
| C | -6.161386 | 1.743982  | -0.776168 |
| H | -6.840774 | 1.091460  | -0.227397 |
| H | -6.713249 | 2.408051  | -1.443670 |
| H | -5.508820 | 2.310699  | -0.111628 |
| N | -4.326301 | -0.259858 | -0.659730 |
| H | -3.614331 | 0.281103  | -0.158349 |

Vibrational frequencies

|           |         |         |
|-----------|---------|---------|
| -191.2309 | 10.2221 | 15.4433 |
| 17.2556   | 23.2242 | 24.9091 |
| 28.4372   | 32.7790 | 34.6289 |

|         |         |         |
|---------|---------|---------|
| 38.6908 | 40.9130 | 44.8681 |
| 50.2256 | 50.8084 | 53.8440 |
| 55.7905 | 61.1281 | 63.2239 |
| 65.9886 | 68.2631 | 69.3970 |
| 72.8114 | 76.1686 | 78.0069 |
| 82.5058 | 85.1869 | 87.5658 |
| 89.7284 | 95.4614 | 97.3193 |

**P**

Cartesian coordinates

|   |           |           |           |
|---|-----------|-----------|-----------|
| S | -0.154025 | -3.183119 | 0.128096  |
| C | 1.318285  | -2.283130 | -0.380316 |
| C | 2.321079  | -1.995107 | 0.550612  |
| C | 1.467979  | -1.861476 | -1.708517 |
| C | 3.444129  | -1.268622 | 0.158997  |
| H | 2.204229  | -2.305039 | 1.583647  |
| C | 2.585335  | -1.116719 | -2.081366 |
| H | 0.704639  | -2.102348 | -2.442012 |
| C | 3.586672  | -0.798970 | -1.153284 |
| H | 4.207268  | -1.032567 | 0.895734  |
| H | 2.676975  | -0.769923 | -3.106632 |
| C | 4.756399  | 0.071704  | -1.536262 |
| H | 4.558026  | 1.105162  | -1.230201 |
| H | 5.676724  | -0.250931 | -1.039588 |
| H | 4.926841  | 0.066389  | -2.616457 |
| C | -4.536930 | 2.022736  | -0.880957 |
| C | -4.620509 | 0.675889  | -1.242586 |
| C | -3.671153 | -0.247312 | -0.803718 |
| C | -2.597974 | 0.185166  | 0.008008  |
| C | -2.544777 | 1.534833  | 0.394345  |
| C | -3.500014 | 2.448456  | -0.049632 |

|   |           |           |           |
|---|-----------|-----------|-----------|
| H | -5.282076 | 2.728624  | -1.235156 |
| H | -5.440139 | 0.332653  | -1.868575 |
| H | -1.752696 | 1.870608  | 1.052732  |
| H | -3.434265 | 3.488027  | 0.257562  |
| C | -3.800292 | -1.722077 | -1.095064 |
| C | -2.433577 | -2.382373 | -1.287106 |
| H | -4.436610 | -1.893930 | -1.968508 |
| H | -4.300373 | -2.199228 | -0.239330 |
| C | -1.460260 | -1.985060 | -0.199537 |
| H | -2.541225 | -3.470806 | -1.314751 |
| H | -1.996681 | -2.094873 | -2.256083 |
| C | -1.553728 | -0.786234 | 0.428740  |
| C | -0.620282 | -0.369673 | 1.521087  |
| C | -0.837406 | -0.814973 | 2.828583  |
| C | 0.462765  | 0.500866  | 1.272867  |
| C | -0.024307 | -0.396262 | 3.881305  |
| H | -1.666474 | -1.491437 | 3.011635  |
| C | 1.284019  | 0.923670  | 2.325979  |
| C | 1.028621  | 0.482697  | 3.623419  |
| H | -0.213717 | -0.749475 | 4.889748  |
| H | 2.130266  | 1.567019  | 2.121514  |
| H | 1.671939  | 0.816990  | 4.431688  |
| S | 1.451889  | 2.256575  | -0.634863 |
| O | 2.759504  | 2.424469  | 0.015432  |
| O | 1.372060  | 2.138582  | -2.095459 |
| C | 0.402263  | 3.606994  | -0.078484 |
| H | 0.332926  | 3.556647  | 1.009515  |
| H | 0.877007  | 4.539446  | -0.386548 |
| H | -0.578799 | 3.488981  | -0.538427 |
| N | 0.693232  | 0.889792  | -0.063484 |

|   |          |          |           |
|---|----------|----------|-----------|
| H | 0.267225 | 0.341621 | -0.801317 |
|---|----------|----------|-----------|

Vibrational frequencies

|          |          |          |
|----------|----------|----------|
| 16.1217  | 39.1837  | 43.1043  |
| 51.3399  | 68.4712  | 70.8210  |
| 74.6617  | 81.8028  | 87.1137  |
| 95.7216  | 122.6496 | 143.1534 |
| 160.6300 | 164.6520 | 170.0014 |
| 198.1607 | 210.0406 | 230.7580 |
| 242.6304 | 256.7147 | 276.8519 |
| 300.9574 | 304.4448 | 318.2098 |
| 330.2888 | 359.1387 | 363.3317 |
| 366.8427 | 379.0717 | 388.9001 |

**TfOH**

Cartesian coordinates

|   |           |           |           |
|---|-----------|-----------|-----------|
| O | 1.224994  | -1.280291 | -0.760105 |
| S | 0.853369  | -0.142783 | 0.061838  |
| O | 1.263734  | 1.187956  | -0.763225 |
| O | 1.253585  | -0.012595 | 1.456679  |
| C | -1.011842 | 0.009511  | -0.001722 |
| F | -1.537773 | -1.015372 | 0.663619  |
| F | -1.374362 | 1.156317  | 0.570529  |
| F | -1.415269 | -0.013971 | -1.267743 |
| H | 1.425275  | 1.924129  | -0.143505 |

Vibrational frequencies

|           |           |           |
|-----------|-----------|-----------|
| 18.9089   | 171.8533  | 178.2974  |
| 275.3438  | 286.8940  | 318.4838  |
| 335.8720  | 432.3407  | 468.9520  |
| 548.0644  | 549.2649  | 578.0456  |
| 752.5267  | 812.0464  | 1109.3402 |
| 1136.3616 | 1214.3806 | 1246.7216 |

1253.2391

1374.4801

3729.6282

**Int02-se**

Cartesian coordinates

|   |           |           |           |
|---|-----------|-----------|-----------|
| C | -1.424973 | -2.493223 | 1.989502  |
| C | -1.701579 | -1.347680 | 1.241393  |
| C | -2.655776 | -0.421107 | 1.657114  |
| C | -3.342711 | -0.665070 | 2.847409  |
| C | -3.065302 | -1.809524 | 3.607107  |
| C | -2.103216 | -2.730774 | 3.184638  |
| C | -0.400137 | -3.363176 | 1.301925  |
| C | 0.138919  | -2.458836 | 0.171571  |
| C | -0.865052 | -1.295717 | -0.019847 |
| H | -2.843568 | 0.472279  | 1.077079  |
| H | -4.091175 | 0.043212  | 3.188741  |
| H | -3.602237 | -1.981769 | 4.535098  |
| H | -1.892805 | -3.617686 | 3.775478  |
| H | 0.382791  | -3.725115 | 1.978042  |
| H | 0.361549  | -2.969560 | -0.757693 |
| H | -0.863766 | -4.245240 | 0.849776  |
| S | -2.558967 | -2.700467 | -1.719860 |
| O | -1.795966 | -3.919808 | -1.399374 |
| O | -2.957291 | -2.423074 | -3.106667 |
| C | -4.038181 | -2.704505 | -0.714275 |
| C | -4.149833 | -3.605417 | 0.345715  |
| C | -5.041302 | -1.772432 | -0.985289 |
| C | -5.282329 | -3.558586 | 1.153074  |
| H | -3.363287 | -4.326126 | 0.531186  |
| C | -6.166705 | -1.744449 | -0.165766 |
| H | -4.938277 | -1.070969 | -1.806204 |
| C | -6.301196 | -2.624297 | 0.917355  |

|   |           |           |           |
|---|-----------|-----------|-----------|
| H | -5.372207 | -4.252297 | 1.983929  |
| H | -6.944113 | -1.012361 | -0.361937 |
| C | -7.494705 | -2.541241 | 1.835715  |
| H | -8.370606 | -2.136831 | 1.321221  |
| H | -7.755172 | -3.521351 | 2.245354  |
| H | -7.277407 | -1.879985 | 2.683579  |
| N | -1.599041 | -1.398419 | -1.298304 |
| H | -2.068884 | -0.513015 | -1.520781 |
| C | 3.032151  | -2.627095 | -0.547338 |
| C | 4.096510  | -3.454173 | -0.149919 |
| C | 2.771753  | -2.321105 | -1.900153 |
| C | 4.897317  | -4.000429 | -1.156573 |
| C | 3.590401  | -2.889600 | -2.884696 |
| C | 4.641254  | -3.718226 | -2.499380 |
| H | 5.722007  | -4.651071 | -0.885457 |
| H | 3.415472  | -2.690615 | -3.933405 |
| H | 5.273377  | -4.153982 | -3.266852 |
| C | 4.385850  | -3.737863 | 1.305344  |
| H | 4.717728  | -2.830652 | 1.821474  |
| H | 3.498760  | -4.105932 | 1.829704  |
| H | 5.173765  | -4.486715 | 1.402119  |
| O | 1.745745  | -1.475000 | -2.121494 |
| C | 1.460243  | -0.967329 | -3.460269 |
| C | 0.782056  | 0.378742  | -3.260634 |
| C | 0.593481  | -1.966503 | -4.216674 |
| H | 2.419839  | -0.816062 | -3.968932 |
| H | 1.414194  | 1.067384  | -2.697768 |
| H | 0.567567  | 0.828750  | -4.233674 |
| H | -0.160135 | 0.259755  | -2.722844 |
| H | -0.380616 | -2.059527 | -3.731586 |

|   |           |           |           |
|---|-----------|-----------|-----------|
| H | 0.439201  | -1.616920 | -5.241960 |
| H | 1.062609  | -2.953123 | -4.258624 |
| H | -0.360792 | -0.330596 | -0.120538 |
| O | -2.447981 | 1.307240  | -1.169591 |
| S | -3.651685 | 1.933357  | -1.815605 |
| O | -4.366037 | 1.028701  | -2.735457 |
| O | -3.415655 | 3.314463  | -2.288945 |
| C | -4.826633 | 2.170969  | -0.386292 |
| F | -4.293734 | 2.996689  | 0.527303  |
| F | -5.977771 | 2.697960  | -0.823161 |
| F | -5.093171 | 1.001445  | 0.216380  |
| S | 2.162574  | 0.404143  | 0.474427  |
| C | 3.878387  | 0.288169  | 0.001376  |
| C | 4.258637  | 0.545799  | -1.320139 |
| C | 4.838904  | -0.114114 | 0.939784  |
| C | 5.592152  | 0.401775  | -1.693936 |
| H | 3.517902  | 0.858370  | -2.045931 |
| C | 6.165318  | -0.269526 | 0.547323  |
| H | 4.542252  | -0.292965 | 1.967616  |
| C | 6.562012  | -0.027568 | -0.776291 |
| H | 5.881147  | 0.606812  | -2.720870 |
| H | 6.903054  | -0.588626 | 1.278247  |
| C | 7.988273  | -0.254731 | -1.209334 |
| H | 8.268217  | 0.407881  | -2.032861 |
| H | 8.120381  | -1.285899 | -1.559316 |
| H | 8.688408  | -0.097301 | -0.384266 |
| C | 2.504439  | -0.822333 | 4.112488  |
| C | 3.099841  | 0.438360  | 4.104766  |
| C | 2.347222  | 1.592948  | 3.834170  |
| C | 0.978826  | 1.454910  | 3.583570  |

|   |           |           |           |
|---|-----------|-----------|-----------|
| C | 0.372120  | 0.195429  | 3.604928  |
| C | 1.132968  | -0.945874 | 3.863100  |
| H | 3.104029  | -1.704754 | 4.317694  |
| H | 4.162898  | 0.532792  | 4.315507  |
| H | 0.381227  | 2.333268  | 3.365114  |
| H | -0.691554 | 0.108108  | 3.417647  |
| H | 0.652379  | -1.918371 | 3.890837  |
| C | 3.023144  | 2.945283  | 3.789991  |
| C | 3.947601  | 3.136635  | 2.556516  |
| H | 2.274286  | 3.741817  | 3.794426  |
| H | 3.646086  | 3.072349  | 4.683136  |
| C | 3.228940  | 3.280481  | 1.295401  |
| H | 4.644559  | 2.291192  | 2.484458  |
| H | 4.565169  | 4.030739  | 2.710906  |
| C | 2.594178  | 3.424510  | 0.270820  |
| C | 1.925122  | 3.634582  | -0.970185 |
| C | 2.667552  | 4.089328  | -2.078729 |
| C | 0.543286  | 3.382238  | -1.140696 |
| C | 2.064855  | 4.285304  | -3.317807 |
| H | 3.728629  | 4.274073  | -1.948384 |
| C | -0.056512 | 3.598974  | -2.386320 |
| C | 0.698643  | 4.040597  | -3.471638 |
| H | 2.659693  | 4.628285  | -4.158498 |
| H | -1.117806 | 3.406153  | -2.498471 |
| H | 0.217358  | 4.193777  | -4.432355 |
| S | -0.861216 | 3.833864  | 1.133794  |
| O | 0.239057  | 4.563495  | 1.774520  |
| O | -1.720085 | 2.957510  | 1.943453  |
| C | -1.880822 | 5.049376  | 0.277827  |
| H | -1.227269 | 5.629861  | -0.373977 |



|    |           |           |           |
|----|-----------|-----------|-----------|
| H  | -2.325368 | 5.687432  | 1.042931  |
| H  | -2.644968 | 4.533723  | -0.302174 |
| N  | -0.236227 | 2.827985  | -0.075517 |
| H  | -1.015178 | 2.250621  | -0.421402 |
| Se | 1.949755  | -1.839678 | 0.827218  |

Vibrational frequencies

|         |         |         |
|---------|---------|---------|
| 13.4790 | 20.7221 | 25.5936 |
| 27.6880 | 31.2152 | 32.2354 |
| 34.4853 | 36.7016 | 41.1266 |
| 43.2689 | 45.6083 | 47.9549 |
| 50.5961 | 50.9022 | 51.2698 |
| 56.7487 | 58.6498 | 59.4985 |
| 64.2738 | 66.8386 | 70.6918 |
| 71.2281 | 78.8824 | 81.7970 |
| 83.2287 | 88.0293 | 89.2232 |
| 92.3640 | 94.9692 | 98.8220 |

**TS2S-Se**

Cartesian coordinates

|   |           |           |           |
|---|-----------|-----------|-----------|
| C | -1.198189 | -2.760159 | 1.758602  |
| C | -1.513477 | -1.550876 | 1.134754  |
| C | -2.523968 | -0.724471 | 1.620942  |
| C | -3.231159 | -1.133768 | 2.752909  |
| C | -2.917747 | -2.343602 | 3.387214  |
| C | -1.897474 | -3.163557 | 2.895742  |
| C | -0.108073 | -3.490004 | 1.012119  |
| C | 0.424689  | -2.432994 | 0.016589  |
| C | -0.652566 | -1.321374 | -0.088367 |
| H | -2.747938 | 0.217060  | 1.136062  |
| H | -4.025484 | -0.505748 | 3.144458  |
| H | -3.471430 | -2.646283 | 4.271155  |

|   |           |           |           |
|---|-----------|-----------|-----------|
| H | -1.658880 | -4.101386 | 3.389415  |
| H | 0.673573  | -3.884180 | 1.668530  |
| H | 0.689010  | -2.832639 | -0.955490 |
| H | -0.517772 | -4.336160 | 0.450132  |
| S | -2.239205 | -2.631489 | -1.973823 |
| O | -1.393873 | -3.827483 | -1.815319 |
| O | -2.664053 | -2.199782 | -3.314051 |
| C | -3.719117 | -2.880404 | -0.998396 |
| C | -3.755228 | -3.895148 | -0.041020 |
| C | -4.806827 | -2.027773 | -1.192546 |
| C | -4.896383 | -4.044594 | 0.741244  |
| H | -2.904595 | -4.552877 | 0.084632  |
| C | -5.939988 | -2.196181 | -0.400796 |
| H | -4.767247 | -1.239469 | -1.935933 |
| C | -6.000247 | -3.194474 | 0.581091  |
| H | -4.927855 | -4.828658 | 1.492231  |
| H | -6.783937 | -1.526969 | -0.537855 |
| C | -7.206979 | -3.327231 | 1.476192  |
| H | -8.108758 | -2.937401 | 0.996283  |
| H | -7.386341 | -4.369329 | 1.756275  |
| H | -7.057038 | -2.761303 | 2.403897  |
| N | -1.374814 | -1.328601 | -1.383425 |
| H | -1.924467 | -0.470059 | -1.506741 |
| C | 3.309636  | -2.294319 | -0.646390 |
| C | 4.420197  | -3.095948 | -0.335923 |
| C | 3.060581  | -1.857334 | -1.964452 |
| C | 5.272721  | -3.475406 | -1.379136 |
| C | 3.918836  | -2.266364 | -2.993285 |
| C | 5.016536  | -3.068336 | -2.687539 |
| H | 6.134138  | -4.099332 | -1.162555 |

|   |           |           |           |
|---|-----------|-----------|-----------|
| H | 3.746060  | -1.960321 | -4.016437 |
| H | 5.681575  | -3.378806 | -3.487828 |
| C | 4.706436  | -3.527326 | 1.082240  |
| H | 4.962434  | -2.664807 | 1.707093  |
| H | 3.832418  | -4.003101 | 1.537672  |
| H | 5.542519  | -4.229161 | 1.114730  |
| O | 1.994033  | -1.034356 | -2.118440 |
| C | 1.682030  | -0.458616 | -3.415499 |
| C | 0.880969  | 0.800696  | -3.126469 |
| C | 0.913629  | -1.461919 | -4.269482 |
| H | 2.627834  | -0.179906 | -3.897081 |
| H | 1.439563  | 1.479133  | -2.480197 |
| H | 0.651783  | 1.320171  | -4.060736 |
| H | -0.058902 | 0.547039  | -2.632750 |
| H | -0.062000 | -1.662032 | -3.821411 |
| H | 0.758216  | -1.051197 | -5.271955 |
| H | 1.456431  | -2.405586 | -4.366931 |
| H | -0.203594 | -0.324982 | -0.078042 |
| O | -2.675237 | 1.219064  | -1.111051 |
| S | -3.961235 | 1.821364  | -1.605337 |
| O | -4.670006 | 0.992689  | -2.596082 |
| O | -3.848747 | 3.266985  | -1.902347 |
| C | -5.047447 | 1.786779  | -0.088622 |
| F | -4.528433 | 2.570304  | 0.871232  |
| F | -6.272609 | 2.234067  | -0.391600 |
| F | -5.152993 | 0.543809  | 0.402939  |
| S | 2.297057  | 0.958803  | 0.614587  |
| C | 3.990835  | 0.711234  | 0.108491  |
| C | 4.393238  | 0.951816  | -1.209243 |
| C | 4.902963  | 0.181773  | 1.032716  |

|   |           |           |           |
|---|-----------|-----------|-----------|
| C | 5.692936  | 0.643772  | -1.599794 |
| H | 3.688524  | 1.359300  | -1.924784 |
| C | 6.196856  | -0.130165 | 0.624948  |
| H | 4.584085  | -0.005434 | 2.052797  |
| C | 6.606483  | 0.075469  | -0.699931 |
| H | 5.995473  | 0.818337  | -2.628385 |
| H | 6.892819  | -0.559549 | 1.340288  |
| C | 7.975865  | -0.353416 | -1.161106 |
| H | 8.347025  | 0.282511  | -1.969722 |
| H | 7.935062  | -1.380835 | -1.543508 |
| H | 8.701753  | -0.335086 | -0.343508 |
| C | 2.711587  | -0.939820 | 4.245909  |
| C | 3.013655  | 0.421278  | 4.219267  |
| C | 2.024877  | 1.374119  | 3.928582  |
| C | 0.717107  | 0.935222  | 3.700806  |
| C | 0.404280  | -0.426120 | 3.751394  |
| C | 1.400482  | -1.366743 | 4.014154  |
| H | 3.493217  | -1.665025 | 4.453783  |
| H | 4.032641  | 0.749657  | 4.412440  |
| H | -0.061642 | 1.654195  | 3.462759  |
| H | -0.616863 | -0.746207 | 3.590143  |
| H | 1.154222  | -2.423804 | 4.041149  |
| C | 2.386682  | 2.837901  | 3.805749  |
| C | 3.304308  | 3.148356  | 2.596624  |
| H | 1.484058  | 3.448336  | 3.720788  |
| H | 2.927235  | 3.166343  | 4.701256  |
| C | 2.655941  | 2.970242  | 1.281941  |
| H | 4.202679  | 2.521532  | 2.629524  |
| H | 3.634769  | 4.191348  | 2.649131  |
| C | 2.116565  | 3.407452  | 0.249993  |

|    |           |           |           |
|----|-----------|-----------|-----------|
| C  | 1.446127  | 3.800874  | -0.922972 |
| C  | 2.164980  | 4.377924  | -1.991540 |
| C  | 0.053343  | 3.556672  | -1.063877 |
| C  | 1.517410  | 4.701011  | -3.177359 |
| H  | 3.228659  | 4.552540  | -1.872372 |
| C  | -0.581204 | 3.884215  | -2.263072 |
| C  | 0.148269  | 4.448101  | -3.311777 |
| H  | 2.075464  | 5.141456  | -3.996546 |
| H  | -1.642583 | 3.685053  | -2.368616 |
| H  | -0.359743 | 4.694338  | -4.238661 |
| S  | -1.198762 | 3.738320  | 1.328099  |
| O  | -0.073996 | 4.498124  | 1.888786  |
| O  | -1.892578 | 2.737468  | 2.148757  |
| C  | -2.393601 | 4.929350  | 0.696901  |
| H  | -1.859360 | 5.617318  | 0.040665  |
| H  | -2.802423 | 5.459520  | 1.558261  |
| H  | -3.170312 | 4.396726  | 0.149764  |
| N  | -0.654158 | 2.886176  | -0.029412 |
| H  | -1.417715 | 2.284932  | -0.378523 |
| Se | 2.145131  | -1.717188 | 0.767013  |

Vibrational frequencies

|           |         |         |
|-----------|---------|---------|
| -202.9359 | 21.3115 | 24.6341 |
| 28.6444   | 31.1737 | 32.2632 |
| 36.4140   | 38.5127 | 41.4031 |
| 42.4054   | 44.7069 | 47.4089 |
| 48.9193   | 54.2869 | 57.1163 |
| 58.8853   | 60.2196 | 62.4849 |
| 66.4923   | 68.1539 | 70.3831 |
| 75.6999   | 76.5068 | 79.8833 |
| 81.8986   | 88.5191 | 90.8993 |

93.8785                                  100.1239                                  101.1834

**TS2R-Se**

Cartesian coordinates

|   |           |           |           |
|---|-----------|-----------|-----------|
| C | -0.306844 | -3.344669 | 0.681142  |
| C | -0.858116 | -2.082692 | 0.451374  |
| C | -1.780486 | -1.522210 | 1.334277  |
| C | -2.146840 | -2.255401 | 2.464495  |
| C | -1.592850 | -3.519964 | 2.703727  |
| C | -0.671006 | -4.074066 | 1.812553  |
| C | 0.631892  | -3.744570 | -0.430094 |
| C | 0.816057  | -2.438580 | -1.241738 |
| C | -0.336499 | -1.480419 | -0.835962 |
| H | -2.212989 | -0.547873 | 1.132122  |
| H | -2.867093 | -1.842056 | 3.161851  |
| H | -1.886630 | -4.075780 | 3.589465  |
| H | -0.241713 | -5.053733 | 2.001908  |
| H | 1.579291  | -4.146750 | -0.058262 |
| H | 0.874428  | -2.582975 | -2.317886 |
| H | 0.174606  | -4.506116 | -1.068592 |
| S | -2.343261 | -2.489804 | -2.461411 |
| O | -1.535907 | -3.712204 | -2.607258 |
| O | -3.021986 | -1.904448 | -3.627226 |
| C | -3.584664 | -2.776279 | -1.205499 |
| C | -3.552506 | -3.931401 | -0.426705 |
| C | -4.518124 | -1.766838 | -0.968236 |
| C | -4.467214 | -4.062379 | 0.615349  |
| H | -2.811734 | -4.697096 | -0.622689 |
| C | -5.414091 | -1.907731 | 0.086233  |
| H | -4.530834 | -0.878341 | -1.583209 |
| C | -5.396340 | -3.050819 | 0.899017  |

|   |           |           |           |
|---|-----------|-----------|-----------|
| H | -4.444280 | -4.955496 | 1.232976  |
| H | -6.124515 | -1.110001 | 0.282945  |
| C | -6.323628 | -3.173662 | 2.082430  |
| H | -6.641797 | -4.208805 | 2.237221  |
| H | -5.815992 | -2.849342 | 2.999467  |
| H | -7.214942 | -2.552111 | 1.962241  |
| N | -1.330717 | -1.280548 | -1.911368 |
| H | -1.883695 | -0.429735 | -1.754088 |
| C | 3.273817  | -1.131693 | -2.440291 |
| C | 4.468840  | -1.704085 | -2.912587 |
| C | 2.583320  | -0.153596 | -3.182818 |
| C | 4.942145  | -1.308621 | -4.168501 |
| C | 3.068995  | 0.210376  | -4.447161 |
| C | 4.240515  | -0.371363 | -4.925620 |
| H | 5.858075  | -1.744975 | -4.553789 |
| H | 2.550629  | 0.941978  | -5.051894 |
| H | 4.611529  | -0.081832 | -5.904076 |
| C | 5.241354  | -2.709838 | -2.092103 |
| H | 5.570605  | -2.271121 | -1.143399 |
| H | 4.621679  | -3.576483 | -1.840507 |
| H | 6.124034  | -3.056687 | -2.633345 |
| O | 1.491384  | 0.381473  | -2.593279 |
| C | 0.789015  | 1.498580  | -3.212447 |
| C | 0.138713  | 2.240265  | -2.060296 |
| C | -0.200340 | 0.996587  | -4.258733 |
| H | 1.535963  | 2.150063  | -3.680459 |
| H | 0.886282  | 2.612916  | -1.359657 |
| H | -0.442532 | 3.087500  | -2.432523 |
| H | -0.539936 | 1.579780  | -1.520557 |
| H | -0.953280 | 0.355167  | -3.799427 |

|   |           |           |           |
|---|-----------|-----------|-----------|
| H | -0.703427 | 1.848878  | -4.724380 |
| H | 0.303749  | 0.424143  | -5.041990 |
| H | 0.039992  | -0.471619 | -0.669815 |
| S | 2.157777  | 0.233994  | 1.026777  |
| C | 2.605644  | -1.033895 | 2.216700  |
| C | 1.618054  | -1.725340 | 2.925204  |
| C | 3.959446  | -1.331199 | 2.432214  |
| C | 1.988712  | -2.694122 | 3.855936  |
| H | 0.570802  | -1.513790 | 2.747590  |
| C | 4.313743  | -2.304453 | 3.362503  |
| H | 4.721219  | -0.807328 | 1.862820  |
| C | 3.336277  | -2.998090 | 4.093251  |
| H | 1.212502  | -3.231712 | 4.392943  |
| H | 5.363984  | -2.533240 | 3.521586  |
| C | 3.729685  | -4.027653 | 5.123188  |
| H | 2.938219  | -4.767097 | 5.273279  |
| H | 4.644047  | -4.553757 | 4.834141  |
| H | 3.921236  | -3.551293 | 6.092535  |
| O | -2.958137 | 3.415105  | -0.783976 |
| S | -3.420435 | 2.162604  | -1.452975 |
| O | -2.829613 | 0.934268  | -0.849177 |
| O | -3.456126 | 2.201686  | -2.923087 |
| C | -5.210715 | 2.059209  | -0.932752 |
| F | -5.852933 | 3.195916  | -1.222946 |
| F | -5.828992 | 1.046433  | -1.565490 |
| F | -5.303907 | 1.838983  | 0.391620  |
| C | 5.775429  | 1.251664  | -0.729642 |
| C | 5.475547  | 1.840114  | 0.497960  |
| C | 4.440046  | 2.779716  | 0.609855  |
| C | 3.723727  | 3.135323  | -0.537726 |



|   |           |          |           |
|---|-----------|----------|-----------|
| C | 4.037612  | 2.561036 | -1.772083 |
| C | 5.058155  | 1.615846 | -1.872179 |
| H | 6.571954  | 0.515987 | -0.799548 |
| H | 6.044596  | 1.560877 | 1.382033  |
| H | 2.909774  | 3.851244 | -0.460688 |
| H | 3.477905  | 2.846382 | -2.657101 |
| H | 5.285980  | 1.157877 | -2.827898 |
| C | 4.079840  | 3.357092 | 1.959445  |
| C | 3.541914  | 2.299733 | 2.948782  |
| H | 3.332792  | 4.148608 | 1.852199  |
| H | 4.965892  | 3.805325 | 2.424740  |
| C | 2.222888  | 1.736265 | 2.575457  |
| H | 4.255637  | 1.475346 | 3.050696  |
| H | 3.424664  | 2.752556 | 3.938842  |
| C | 0.995470  | 1.730642 | 2.790760  |
| C | -0.385496 | 1.620163 | 2.990941  |
| C | -0.882182 | 0.841600 | 4.061883  |
| C | -1.295226 | 2.269324 | 2.112352  |
| C | -2.249062 | 0.694289 | 4.243216  |
| H | -0.175410 | 0.354988 | 4.724606  |
| C | -2.667550 | 2.092071 | 2.297300  |
| C | -3.137339 | 1.307463 | 3.350294  |
| H | -2.626174 | 0.094608 | 5.064244  |
| H | -3.357726 | 2.565327 | 1.611501  |
| H | -4.207681 | 1.180353 | 3.477461  |
| S | -0.116110 | 4.544986 | 1.239420  |
| O | 0.530478  | 4.574359 | 2.557264  |
| O | 0.665961  | 4.832293 | 0.031631  |
| C | -1.542495 | 5.645153 | 1.262440  |
| H | -2.152506 | 5.389827 | 2.129864  |

|    |           |           |           |
|----|-----------|-----------|-----------|
| H  | -1.167527 | 6.666830  | 1.338263  |
| H  | -2.099214 | 5.493280  | 0.336845  |
| N  | -0.800328 | 3.005806  | 1.014217  |
| H  | -1.473659 | 3.056317  | 0.234921  |
| Se | 2.617459  | -1.708173 | -0.733084 |

Vibrational frequencies

|           |         |         |
|-----------|---------|---------|
| -203.8739 | 16.8345 | 19.8766 |
| 21.0476   | 24.1625 | 27.3421 |
| 30.9315   | 31.8418 | 34.9854 |
| 38.0475   | 40.7351 | 42.5387 |
| 45.6552   | 46.2278 | 49.5808 |
| 54.2214   | 57.1171 | 59.7534 |
| 62.4743   | 65.8621 | 68.5867 |
| 69.4023   | 71.4973 | 72.2089 |
| 77.8292   | 81.9679 | 84.5498 |
| 91.9079   | 93.3873 | 95.1602 |

**Int2S-se**

Cartesian coordinates

|   |           |           |           |
|---|-----------|-----------|-----------|
| C | -1.351859 | -2.791810 | 1.761869  |
| C | -1.560738 | -1.566459 | 1.121783  |
| C | -2.466871 | -0.632939 | 1.620684  |
| C | -3.183522 | -0.950824 | 2.776848  |
| C | -2.984288 | -2.179745 | 3.419916  |
| C | -2.065213 | -3.106814 | 2.918047  |
| C | -0.340349 | -3.627959 | 1.015064  |
| C | 0.300763  | -2.625569 | 0.027695  |
| C | -0.700056 | -1.447574 | -0.118762 |
| H | -2.604763 | 0.321089  | 1.127020  |
| H | -3.895768 | -0.237270 | 3.180058  |
| H | -3.544454 | -2.411831 | 4.321175  |

|   |           |           |           |
|---|-----------|-----------|-----------|
| H | -1.910685 | -4.056539 | 3.422775  |
| H | 0.399314  | -4.094766 | 1.670867  |
| H | 0.563748  | -3.058986 | -0.931722 |
| H | -0.836605 | -4.429260 | 0.456753  |
| S | -2.370814 | -2.693060 | -1.987606 |
| O | -1.587592 | -3.931846 | -1.845452 |
| O | -2.794721 | -2.240615 | -3.321714 |
| C | -3.846848 | -2.868219 | -0.988716 |
| C | -3.940467 | -3.910447 | -0.065586 |
| C | -4.869784 | -1.928867 | -1.126100 |
| C | -5.072291 | -4.000843 | 0.739350  |
| H | -3.140581 | -4.635721 | 0.014072  |
| C | -5.993661 | -2.036969 | -0.310781 |
| H | -4.787932 | -1.121404 | -1.845963 |
| C | -6.109165 | -3.062057 | 0.638002  |
| H | -5.147973 | -4.807379 | 1.463129  |
| H | -6.785144 | -1.299514 | -0.402646 |
| C | -7.301416 | -3.134757 | 1.559205  |
| H | -8.169621 | -2.623082 | 1.135294  |
| H | -7.580318 | -4.170842 | 1.772788  |
| H | -7.071699 | -2.655321 | 2.518717  |
| N | -1.442768 | -1.437785 | -1.404748 |
| H | -1.932315 | -0.547568 | -1.545657 |
| C | 3.182380  | -2.476047 | -0.630575 |
| C | 4.243242  | -3.363162 | -0.387987 |
| C | 2.985620  | -1.919904 | -1.910842 |
| C | 5.091353  | -3.705153 | -1.449573 |
| C | 3.835751  | -2.286721 | -2.962714 |
| C | 4.880600  | -3.177100 | -2.720899 |
| H | 5.912640  | -4.394060 | -1.276052 |

|   |           |           |           |
|---|-----------|-----------|-----------|
| H | 3.698803  | -1.882594 | -3.956996 |
| H | 5.537069  | -3.457321 | -3.539507 |
| C | 4.489245  | -3.922475 | 0.992043  |
| H | 4.784355  | -3.128366 | 1.687608  |
| H | 3.578807  | -4.370031 | 1.401872  |
| H | 5.282444  | -4.673888 | 0.976706  |
| O | 1.965208  | -1.023616 | -2.018492 |
| C | 1.651329  | -0.420682 | -3.298235 |
| C | 0.870720  | 0.843889  | -2.977203 |
| C | 0.861334  | -1.391611 | -4.171271 |
| H | 2.593642  | -0.139061 | -3.785802 |
| H | 1.455943  | 1.506669  | -2.338339 |
| H | 0.630224  | 1.382907  | -3.897509 |
| H | -0.063885 | 0.604257  | -2.466251 |
| H | -0.108075 | -1.597946 | -3.712798 |
| H | 0.695507  | -0.951080 | -5.159407 |
| H | 1.395369  | -2.335915 | -4.303326 |
| H | -0.170628 | -0.493008 | -0.150562 |
| O | -2.470453 | 1.259730  | -1.148409 |
| S | -3.718681 | 1.902665  | -1.687691 |
| O | -4.430878 | 1.086167  | -2.685571 |
| O | -3.541345 | 3.338977  | -1.999546 |
| C | -4.852449 | 1.928885  | -0.205811 |
| F | -4.333425 | 2.697826  | 0.766276  |
| F | -6.046944 | 2.425269  | -0.552337 |
| F | -5.027002 | 0.696392  | 0.290791  |
| S | 2.319421  | 1.265587  | 0.678319  |
| C | 3.942161  | 0.751391  | 0.106756  |
| C | 4.348739  | 1.001350  | -1.204091 |
| C | 4.745803  | 0.011932  | 0.980915  |

|   |           |           |           |
|---|-----------|-----------|-----------|
| C | 5.568050  | 0.492164  | -1.643670 |
| H | 3.722466  | 1.573722  | -1.879200 |
| C | 5.959964  | -0.489534 | 0.521431  |
| H | 4.415201  | -0.184115 | 1.995986  |
| C | 6.382673  | -0.273346 | -0.797670 |
| H | 5.880529  | 0.673054  | -2.667750 |
| H | 6.580582  | -1.075367 | 1.193132  |
| C | 7.655402  | -0.895596 | -1.310597 |
| H | 8.102204  | -0.299167 | -2.110770 |
| H | 7.438480  | -1.890024 | -1.718106 |
| H | 8.394256  | -1.017846 | -0.513702 |
| C | 2.837328  | -0.824819 | 4.345472  |
| C | 3.020404  | 0.558335  | 4.308241  |
| C | 1.954868  | 1.416086  | 3.994311  |
| C | 0.699250  | 0.857615  | 3.726891  |
| C | 0.508769  | -0.525789 | 3.779576  |
| C | 1.577500  | -1.369893 | 4.082643  |
| H | 3.674283  | -1.474696 | 4.584750  |
| H | 4.000736  | 0.976531  | 4.525313  |
| H | -0.132017 | 1.504888  | 3.460037  |
| H | -0.471325 | -0.939270 | 3.579005  |
| H | 1.430734  | -2.444786 | 4.112336  |
| C | 2.166796  | 2.913549  | 3.904480  |
| C | 3.141818  | 3.337158  | 2.776670  |
| H | 1.214064  | 3.420993  | 3.739099  |
| H | 2.589518  | 3.294793  | 4.840814  |
| C | 2.681810  | 2.941134  | 1.432495  |
| H | 4.133306  | 2.901131  | 2.942451  |
| H | 3.252988  | 4.426132  | 2.764329  |
| C | 2.236074  | 3.164520  | 0.258946  |

|    |           |           |           |
|----|-----------|-----------|-----------|
| C  | 1.670682  | 3.793432  | -0.899307 |
| C  | 2.473158  | 4.411840  | -1.869260 |
| C  | 0.277746  | 3.662484  | -1.100362 |
| C  | 1.887624  | 4.892800  | -3.038378 |
| H  | 3.542113  | 4.494265  | -1.706039 |
| C  | -0.295347 | 4.139852  | -2.279070 |
| C  | 0.513070  | 4.744894  | -3.244815 |
| H  | 2.504245  | 5.370643  | -3.791972 |
| H  | -1.363301 | 4.019234  | -2.432473 |
| H  | 0.062757  | 5.108093  | -4.162929 |
| S  | -1.030069 | 3.834775  | 1.242600  |
| O  | 0.109693  | 4.584134  | 1.791620  |
| O  | -1.726615 | 2.844387  | 2.072683  |
| C  | -2.213359 | 5.038046  | 0.616480  |
| H  | -1.670717 | 5.725667  | -0.033015 |
| H  | -2.620911 | 5.565291  | 1.480200  |
| H  | -2.990568 | 4.513372  | 0.063158  |
| N  | -0.485776 | 2.979703  | -0.112025 |
| H  | -1.239720 | 2.377428  | -0.483447 |
| Se | 2.017314  | -1.948676 | 0.808389  |

Vibrational frequencies

|         |         |         |
|---------|---------|---------|
| 16.7639 | 22.2308 | 24.8427 |
| 27.9011 | 34.2040 | 37.2893 |
| 40.2428 | 42.1394 | 43.8575 |
| 45.8969 | 48.5594 | 52.0817 |
| 56.4608 | 57.4378 | 60.0356 |
| 60.7269 | 63.2103 | 68.0616 |
| 73.2535 | 75.5073 | 77.5703 |
| 81.4074 | 83.9105 | 85.0532 |
| 87.9547 | 89.2897 | 93.9232 |

94.3282                      96.2185                      99.6422

**Int2R-se**

Cartesian coordinates

|   |           |           |           |
|---|-----------|-----------|-----------|
| C | 0.014350  | -2.559415 | 1.950535  |
| C | -0.598373 | -1.607460 | 1.133123  |
| C | -1.613494 | -0.781509 | 1.619067  |
| C | -2.024674 | -0.938059 | 2.944111  |
| C | -1.429608 | -1.908150 | 3.761651  |
| C | -0.407428 | -2.723194 | 3.270458  |
| C | 1.085453  | -3.319459 | 1.208701  |
| C | 1.158095  | -2.629712 | -0.179088 |
| C | -0.076842 | -1.689795 | -0.286803 |
| H | -2.098607 | -0.065218 | 0.964985  |
| H | -2.820802 | -0.314637 | 3.335524  |
| H | -1.767996 | -2.027606 | 4.787002  |
| H | 0.058777  | -3.466494 | 3.910917  |
| H | 2.046767  | -3.289564 | 1.732474  |
| H | 1.192888  | -3.336628 | -1.003819 |
| H | 0.806272  | -4.371296 | 1.091576  |
| S | -1.972031 | -3.530194 | -1.129637 |
| O | -1.074863 | -4.585495 | -0.631161 |
| O | -2.660114 | -3.689135 | -2.420739 |
| C | -3.236052 | -3.241194 | 0.104677  |
| C | -3.173397 | -3.881144 | 1.340082  |
| C | -4.241993 | -2.317527 | -0.183667 |
| C | -4.132936 | -3.576815 | 2.303082  |
| H | -2.375019 | -4.584049 | 1.543814  |
| C | -5.180630 | -2.012279 | 0.795861  |
| H | -4.277798 | -1.828998 | -1.147448 |
| C | -5.137081 | -2.630924 | 2.054363  |

|   |           |           |           |
|---|-----------|-----------|-----------|
| H | -4.086920 | -4.065889 | 3.271822  |
| H | -5.947098 | -1.274427 | 0.579100  |
| C | -6.119691 | -2.252023 | 3.134593  |
| H | -6.350643 | -3.101419 | 3.784004  |
| H | -5.702739 | -1.460497 | 3.769878  |
| H | -7.055585 | -1.874743 | 2.713345  |
| N | -1.067890 | -2.136488 | -1.296800 |
| H | -1.686218 | -1.368079 | -1.577436 |
| C | 3.328479  | -1.946797 | -2.132581 |
| C | 4.443923  | -2.760221 | -2.400232 |
| C | 2.594315  | -1.362626 | -3.186090 |
| C | 4.822910  | -2.968855 | -3.733450 |
| C | 2.991616  | -1.584038 | -4.512537 |
| C | 4.103109  | -2.383896 | -4.771963 |
| H | 5.682156  | -3.595442 | -3.952456 |
| H | 2.446940  | -1.143857 | -5.337130 |
| H | 4.403631  | -2.553211 | -5.801813 |
| C | 5.241210  | -3.390146 | -1.282271 |
| H | 5.745162  | -2.627820 | -0.677572 |
| H | 4.587107  | -3.938817 | -0.598298 |
| H | 5.999418  | -4.070193 | -1.678109 |
| O | 1.545073  | -0.582990 | -2.820796 |
| C | 0.773400  | 0.146561  | -3.809913 |
| C | 0.122023  | 1.278618  | -3.033527 |
| C | -0.239305 | -0.769450 | -4.491344 |
| H | 1.467353  | 0.567551  | -4.549601 |
| H | 0.869545  | 1.928160  | -2.577868 |
| H | -0.509844 | 1.881784  | -3.690416 |
| H | -0.507938 | 0.871573  | -2.240990 |
| H | -0.928185 | -1.185081 | -3.754500 |



|   |           |           |           |
|---|-----------|-----------|-----------|
| H | -0.818465 | -0.200614 | -5.224240 |
| H | 0.249458  | -1.600671 | -5.005272 |
| H | 0.226168  | -0.716404 | -0.673281 |
| S | 1.777541  | 1.269010  | 1.215404  |
| C | 2.378619  | 0.292307  | 2.603852  |
| C | 1.514413  | -0.088876 | 3.629482  |
| C | 3.722439  | -0.101959 | 2.607476  |
| C | 2.010052  | -0.855984 | 4.681352  |
| H | 0.463011  | 0.173338  | 3.597575  |
| C | 4.194389  | -0.875419 | 3.663955  |
| H | 4.381914  | 0.182320  | 1.794975  |
| C | 3.351088  | -1.260502 | 4.717707  |
| H | 1.332657  | -1.165918 | 5.470989  |
| H | 5.234500  | -1.188412 | 3.667814  |
| C | 3.883191  | -2.078195 | 5.867683  |
| H | 3.083967  | -2.627696 | 6.372021  |
| H | 4.637030  | -2.795541 | 5.530791  |
| H | 4.360343  | -1.430869 | 6.613337  |
| O | -3.076793 | 2.583475  | -2.041757 |
| S | -3.440454 | 1.157019  | -2.292054 |
| O | -2.732425 | 0.216158  | -1.380465 |
| O | -3.509446 | 0.757949  | -3.706369 |
| C | -5.203041 | 1.069059  | -1.684636 |
| F | -5.958885 | 1.995079  | -2.285204 |
| F | -5.728618 | -0.141834 | -1.938818 |
| F | -5.252535 | 1.271846  | -0.354323 |
| C | 5.809084  | 1.309827  | -0.206134 |
| C | 5.308239  | 2.472816  | 0.383286  |
| C | 4.197310  | 3.130265  | -0.163167 |
| C | 3.608357  | 2.609225  | -1.322241 |

|   |           |           |           |
|---|-----------|-----------|-----------|
| C | 4.104421  | 1.444884  | -1.910369 |
| C | 5.200461  | 0.785687  | -1.349705 |
| H | 6.670127  | 0.810911  | 0.229588  |
| H | 5.782879  | 2.869003  | 1.277842  |
| H | 2.742862  | 3.110665  | -1.746769 |
| H | 3.625484  | 1.044444  | -2.795578 |
| H | 5.578507  | -0.123662 | -1.805176 |
| C | 3.597476  | 4.338213  | 0.525477  |
| C | 2.989893  | 4.003641  | 1.910497  |
| H | 2.817088  | 4.782475  | -0.096710 |
| H | 4.361802  | 5.104327  | 0.695526  |
| C | 1.898771  | 3.012762  | 1.852060  |
| H | 3.763686  | 3.616884  | 2.583105  |
| H | 2.563305  | 4.903462  | 2.364681  |
| C | 0.687122  | 2.637019  | 2.015014  |
| C | -0.728883 | 2.697789  | 2.250000  |
| C | -1.271014 | 2.537194  | 3.532481  |
| C | -1.574943 | 2.846904  | 1.129212  |
| C | -2.653688 | 2.505156  | 3.696057  |
| H | -0.607718 | 2.423647  | 4.382815  |
| C | -2.958470 | 2.793966  | 1.303600  |
| C | -3.490645 | 2.612244  | 2.581494  |
| H | -3.076321 | 2.378200  | 4.686774  |
| H | -3.602954 | 2.881721  | 0.437789  |
| H | -4.567643 | 2.564434  | 2.705645  |
| S | -0.386654 | 4.526617  | -0.604349 |
| O | 0.161315  | 5.166269  | 0.600126  |
| O | 0.479930  | 4.307902  | -1.768468 |
| C | -1.844100 | 5.440341  | -1.133814 |
| H | -2.511382 | 5.534051  | -0.276004 |

|    |           |           |           |
|----|-----------|-----------|-----------|
| H  | -1.506175 | 6.420890  | -1.471937 |
| H  | -2.319545 | 4.879276  | -1.938523 |
| N  | -0.982895 | 2.991963  | -0.155219 |
| H  | -1.595375 | 2.652997  | -0.911623 |
| Se | 2.848607  | -1.566704 | -0.307395 |

Vibrational frequencies

|         |         |         |
|---------|---------|---------|
| 14.6316 | 20.8013 | 24.4009 |
| 28.1108 | 30.8736 | 32.1140 |
| 33.9159 | 34.9507 | 35.7731 |
| 37.9793 | 39.8408 | 42.9451 |
| 45.4128 | 46.7879 | 48.0811 |
| 51.3875 | 53.5977 | 56.7672 |
| 59.0809 | 62.9699 | 64.4962 |
| 68.1181 | 71.3639 | 74.8269 |
| 79.0133 | 81.7122 | 85.8589 |
| 89.1539 | 92.1694 | 95.4046 |

**TS5**

Cartesian coordinates

|   |          |           |           |
|---|----------|-----------|-----------|
| C | 0.472169 | -1.412732 | 0.292631  |
| C | 0.904154 | -0.136165 | 0.111682  |
| C | 2.404889 | 0.007217  | 0.110996  |
| C | 3.169531 | -1.025768 | -0.484800 |
| C | 2.439003 | -2.267271 | -0.932372 |
| C | 1.400856 | -2.591566 | 0.153310  |
| H | 2.561594 | 1.723240  | 1.418734  |
| C | 3.101686 | 1.007657  | 0.811951  |
| C | 4.562709 | -0.944787 | -0.508989 |
| H | 1.914353 | -2.102665 | -1.884190 |
| H | 1.913271 | -2.815502 | 1.101490  |
| C | 5.233430 | 0.116444  | 0.101052  |

|   |           |           |           |
|---|-----------|-----------|-----------|
| C | 4.496327  | 1.072750  | 0.796502  |
| H | 5.127528  | -1.742856 | -0.983923 |
| H | 6.317795  | 0.166904  | 0.073495  |
| H | 4.999642  | 1.865700  | 1.341577  |
| C | -0.005829 | 1.043489  | -0.083114 |
| C | -1.396473 | 0.954783  | -0.394320 |
| C | 0.511927  | 2.358964  | -0.077959 |
| C | -2.185756 | 2.103009  | -0.529145 |
| C | -0.276163 | 3.497999  | -0.206327 |
| H | 1.574782  | 2.506681  | 0.017748  |
| C | -1.650331 | 3.377327  | -0.397260 |
| H | -3.234417 | 1.975497  | -0.774978 |
| H | 0.193407  | 4.475977  | -0.167557 |
| H | -2.284754 | 4.252317  | -0.494489 |
| H | 3.139441  | -3.094536 | -1.079429 |
| H | 0.818379  | -3.480899 | -0.107893 |
| S | -3.240535 | -0.937354 | 0.323138  |
| O | -2.887581 | -2.354744 | 0.513458  |
| O | -3.428000 | -0.054423 | 1.479964  |
| C | -4.720671 | -0.874327 | -0.690587 |
| H | -4.535777 | -1.444205 | -1.601262 |
| H | -5.529829 | -1.321591 | -0.110815 |
| H | -4.940540 | 0.168199  | -0.920119 |
| N | -2.058511 | -0.274545 | -0.691401 |
| H | -1.463247 | -1.011840 | -1.055489 |
| H | -0.557608 | -1.649756 | 0.509816  |

Vibrational frequencies

|          |          |          |
|----------|----------|----------|
| -32.0016 | 28.2857  | 56.4173  |
| 64.5768  | 97.8496  | 104.6656 |
| 153.8236 | 172.9365 | 200.8746 |

|          |          |          |
|----------|----------|----------|
| 223.8105 | 228.2130 | 259.4361 |
| 277.3887 | 286.6101 | 324.3361 |
| 334.7534 | 359.1455 | 381.0338 |
| 417.6591 | 435.4252 | 460.9692 |
| 473.5358 | 482.3302 | 504.5889 |
| 511.6471 | 529.7166 | 548.3484 |
| 560.0836 | 601.0445 | 638.2218 |

## TS6

Cartesian coordinates

|   |           |           |           |
|---|-----------|-----------|-----------|
| C | 0.812490  | -1.683590 | -0.110581 |
| C | 1.015093  | -0.325696 | -0.096549 |
| C | 2.468408  | 0.034430  | 0.139799  |
| C | 3.491686  | -0.696521 | -0.492738 |
| C | 3.039620  | -1.874436 | -1.307202 |
| C | 1.988361  | -2.589269 | -0.455479 |
| H | 2.070960  | 1.500991  | 1.674444  |
| C | 2.839956  | 0.973208  | 1.119914  |
| C | 4.833640  | -0.415556 | -0.227091 |
| H | 2.575819  | -1.553692 | -2.250511 |
| H | 2.450691  | -2.987067 | 0.461677  |
| C | 5.187198  | 0.568327  | 0.696518  |
| C | 4.180942  | 1.245026  | 1.388878  |
| H | 5.603466  | -0.992642 | -0.733223 |
| H | 6.233055  | 0.782236  | 0.895838  |
| H | 4.436069  | 1.981889  | 2.144926  |
| C | 0.070943  | 0.845452  | -0.262409 |
| C | -1.354696 | 0.876102  | -0.349647 |
| C | 0.684804  | 2.103460  | -0.510598 |
| C | -2.046443 | 2.091944  | -0.477207 |
| C | -0.000688 | 3.302236  | -0.647897 |

|   |           |           |           |
|---|-----------|-----------|-----------|
| H | 1.759773  | 2.143466  | -0.595391 |
| C | -1.391516 | 3.308620  | -0.585039 |
| H | -3.128159 | 2.071233  | -0.514202 |
| H | 0.555705  | 4.219885  | -0.810688 |
| H | -1.959617 | 4.228985  | -0.674060 |
| H | 3.874583  | -2.536880 | -1.553352 |
| H | 1.584961  | -3.456760 | -0.992606 |
| S | -3.569766 | -0.594257 | 0.426997  |
| O | -3.557934 | -2.024554 | 0.765101  |
| O | -3.719953 | 0.420394  | 1.475038  |
| C | -4.860885 | -0.348919 | -0.799104 |
| H | -4.692069 | -1.052982 | -1.614155 |
| H | -5.815204 | -0.548548 | -0.308820 |
| H | -4.821752 | 0.678729  | -1.159676 |
| N | -2.147795 | -0.296657 | -0.415659 |
| H | -1.718512 | -1.143551 | -0.752827 |
| C | -0.390787 | -2.512796 | 0.272951  |
| H | -1.070626 | -2.019992 | 0.960301  |
| H | -0.957722 | -2.902439 | -0.585054 |
| H | -0.016254 | -3.407000 | 0.784814  |

Vibrational frequencies

|          |          |          |
|----------|----------|----------|
| -43.5745 | 33.2572  | 37.1518  |
| 75.6422  | 84.6069  | 115.0900 |
| 134.5795 | 157.3183 | 169.4316 |
| 193.7399 | 211.6357 | 225.8623 |
| 239.6874 | 261.3223 | 288.1346 |
| 299.7638 | 333.6562 | 342.7270 |
| 351.2203 | 370.1150 | 393.0844 |
| 415.9739 | 444.9464 | 456.4218 |
| 461.9562 | 479.5068 | 499.6984 |

510.3833

527.7809

538.4091

**TS7**

Cartesian coordinates

|   |           |           |           |
|---|-----------|-----------|-----------|
| C | -0.842507 | 1.451736  | -0.351110 |
| C | -1.059120 | 0.090584  | -0.268084 |
| C | -2.503502 | -0.242863 | 0.053293  |
| C | -3.549569 | 0.446197  | -0.584470 |
| C | -3.109880 | 1.547459  | -1.500256 |
| C | -2.031765 | 2.322608  | -0.737806 |
| H | -2.048065 | -1.597758 | 1.673357  |
| C | -2.837224 | -1.102887 | 1.116847  |
| C | -4.880883 | 0.203623  | -0.239708 |
| H | -2.669942 | 1.145232  | -2.423929 |
| H | -2.474019 | 2.804197  | 0.148367  |
| C | -5.199453 | -0.704607 | 0.769927  |
| C | -4.166598 | -1.339736 | 1.463757  |
| H | -5.667473 | 0.750225  | -0.753994 |
| H | -6.236505 | -0.892057 | 1.032146  |
| H | -4.392580 | -2.016473 | 2.282833  |
| C | -0.142167 | -1.108116 | -0.350789 |
| C | 1.282524  | -1.210447 | -0.389130 |
| C | -0.798519 | -2.359792 | -0.526730 |
| C | 1.921393  | -2.459336 | -0.354923 |
| C | -0.162731 | -3.592620 | -0.522077 |
| H | -1.869855 | -2.362953 | -0.658862 |
| C | 1.220622  | -3.655309 | -0.374393 |
| H | 3.003005  | -2.486818 | -0.350041 |
| H | -0.752924 | -4.496599 | -0.636217 |
| H | 1.747903  | -4.603069 | -0.341686 |
| H | -3.942222 | 2.199496  | -1.781390 |

|   |           |           |           |
|---|-----------|-----------|-----------|
| H | -1.660578 | 3.135302  | -1.367640 |
| S | 3.521915  | 0.299911  | 0.247981  |
| O | 3.693688  | 1.754316  | 0.124103  |
| O | 3.432459  | -0.344668 | 1.561863  |
| C | 4.894188  | -0.433786 | -0.665000 |
| H | 4.872975  | -0.047267 | -1.684564 |
| H | 5.808635  | -0.119305 | -0.159042 |
| H | 4.810705  | -1.519460 | -0.656525 |
| N | 2.117862  | -0.068790 | -0.576753 |
| H | 2.016567  | 0.435073  | -1.449255 |
| C | 0.400146  | 2.227363  | 0.087086  |
| C | 0.686992  | 1.882251  | 1.565159  |
| C | 0.330881  | 3.756173  | -0.073801 |
| H | 1.267115  | 1.916534  | -0.481594 |
| H | 0.834148  | 0.809122  | 1.700825  |
| H | 1.592920  | 2.393065  | 1.903679  |
| H | -0.149071 | 2.195308  | 2.200780  |
| H | 0.213893  | 4.064522  | -1.117225 |
| H | -0.478987 | 4.205461  | 0.509816  |
| H | 1.272550  | 4.183034  | 0.285251  |

Vibrational frequencies

|          |          |          |
|----------|----------|----------|
| -30.8860 | 43.7249  | 56.0523  |
| 68.8632  | 80.9867  | 105.2571 |
| 112.0589 | 123.2200 | 153.1917 |
| 162.2842 | 176.6899 | 184.7126 |
| 202.7492 | 234.4753 | 252.7702 |
| 278.5914 | 285.7220 | 297.1412 |
| 308.4749 | 324.8464 | 342.4459 |
| 344.2144 | 359.9269 | 390.6294 |
| 404.1233 | 419.5946 | 444.4909 |



455.2692                      465.0090                      485.4832

**TS8**

Cartesian coordinates

|   |           |           |           |
|---|-----------|-----------|-----------|
| C | -0.499982 | -0.938490 | 0.067557  |
| C | 0.790649  | -0.646676 | -0.076347 |
| C | 1.894702  | -1.110495 | 1.464653  |
| C | 0.984140  | -1.427359 | 2.522125  |
| C | -0.212442 | -2.266833 | 2.192738  |
| C | -1.182436 | -1.428791 | 1.323121  |
| H | 3.612448  | 0.116314  | 0.955020  |
| C | 2.918763  | -0.144732 | 1.747958  |
| C | 1.100170  | -0.792054 | 3.758985  |
| H | 0.071154  | -3.164055 | 1.632214  |
| H | -1.562367 | -0.583882 | 1.908227  |
| C | 2.120077  | 0.125216  | 4.010116  |
| C | 3.030064  | 0.447805  | 2.986618  |
| H | 0.374429  | -1.019925 | 4.535908  |
| H | 2.199447  | 0.600066  | 4.983117  |
| H | 3.819409  | 1.170489  | 3.171529  |
| C | 1.656889  | -0.194820 | -1.087240 |
| C | 1.620793  | 1.183083  | -1.483605 |
| C | 2.830929  | -0.996423 | -1.439690 |
| C | 2.706613  | 1.791065  | -2.066311 |
| C | 3.979020  | -0.272156 | -1.931554 |
| C | 3.914958  | 1.060408  | -2.238388 |
| H | 2.630745  | 2.817809  | -2.407959 |
| H | 4.893841  | -0.816345 | -2.136941 |
| H | 4.778806  | 1.560066  | -2.666098 |
| H | -0.731608 | -2.589941 | 3.100286  |
| H | -2.050542 | -2.036085 | 1.053084  |

|   |           |           |           |
|---|-----------|-----------|-----------|
| S | 0.249500  | 2.912502  | 0.085540  |
| O | -1.193224 | 2.907777  | 0.389778  |
| O | 1.218745  | 2.550948  | 1.127265  |
| C | 0.695186  | 4.538644  | -0.532892 |
| H | 0.022742  | 4.793797  | -1.351239 |
| H | 0.589475  | 5.239352  | 0.296848  |
| H | 1.730814  | 4.503362  | -0.871626 |
| N | 0.417704  | 1.934511  | -1.288128 |
| H | -0.430762 | 1.371329  | -1.374301 |
| S | -1.471772 | -0.926260 | -1.473720 |
| C | -3.155673 | -0.670432 | -0.907592 |
| C | -4.131835 | -1.624433 | -1.215439 |
| C | -3.516031 | 0.489162  | -0.205520 |
| C | -5.457448 | -1.414763 | -0.831717 |
| H | -3.856867 | -2.526344 | -1.753162 |
| C | -4.838250 | 0.671818  | 0.191503  |
| H | -2.768096 | 1.239430  | 0.031528  |
| C | -5.831711 | -0.270968 | -0.115989 |
| H | -6.208183 | -2.158837 | -1.084403 |
| H | -5.107478 | 1.570696  | 0.740346  |
| C | -7.256567 | -0.065580 | 0.337643  |
| H | -7.385338 | -0.390512 | 1.377391  |
| H | -7.541010 | 0.990040  | 0.291864  |
| H | -7.959431 | -0.637668 | -0.274298 |
| C | 2.879040  | -2.380554 | -1.242132 |
| C | 4.189137  | -3.127649 | -1.237928 |
| C | 1.667383  | -3.278941 | -1.328375 |
| H | 2.250901  | -1.921715 | 0.780840  |
| H | 5.005263  | -2.552946 | -0.792794 |
| H | 4.087053  | -4.058890 | -0.670810 |

|   |          |           |           |
|---|----------|-----------|-----------|
| H | 4.496196 | -3.414214 | -2.255296 |
| H | 0.757669 | -2.751591 | -1.610982 |
| H | 1.863394 | -4.045064 | -2.092309 |
| H | 1.469331 | -3.826294 | -0.398349 |

Vibrational frequencies

|          |          |          |
|----------|----------|----------|
| -22.8451 | 21.9104  | 26.1960  |
| 36.3054  | 45.5652  | 52.6708  |
| 64.4906  | 71.9944  | 83.3805  |
| 103.2780 | 107.3902 | 133.4966 |
| 155.8416 | 175.2675 | 194.6038 |
| 207.4198 | 239.0744 | 253.8208 |
| 268.3430 | 277.5681 | 296.4415 |
| 301.8914 | 308.1877 | 334.0437 |
| 359.2577 | 378.9422 | 384.2196 |
| 386.0115 | 421.3812 | 431.9014 |

**M06-2x TS2S**

Cartesian coordinates

|   |           |           |          |
|---|-----------|-----------|----------|
| C | -1.185474 | -2.505013 | 2.024865 |
| C | -1.496939 | -1.403486 | 1.234174 |
| C | -2.554630 | -0.557530 | 1.559199 |
| C | -3.289693 | -0.826474 | 2.710704 |
| C | -2.960573 | -1.914862 | 3.525955 |
| C | -1.908471 | -2.762742 | 3.187660 |
| C | -0.069749 | -3.319213 | 1.421751 |
| C | 0.473729  | -2.425053 | 0.282051 |
| C | -0.595515 | -1.325121 | 0.020141 |
| H | -2.792343 | 0.296161  | 0.933500 |
| H | -4.119771 | -0.180367 | 2.979202 |
| H | -3.535658 | -2.104831 | 4.427027 |
| H | -1.662639 | -3.615719 | 3.814339 |

|   |           |           |           |
|---|-----------|-----------|-----------|
| H | 0.702201  | -3.590467 | 2.148239  |
| H | 0.671494  | -2.981070 | -0.630779 |
| H | -0.458134 | -4.247288 | 0.989241  |
| S | -2.174120 | -2.844699 | -1.652644 |
| O | -1.371558 | -4.010784 | -1.288238 |
| O | -2.576149 | -2.634971 | -3.039705 |
| C | -3.653562 | -2.890298 | -0.672497 |
| C | -3.745790 | -3.795271 | 0.381101  |
| C | -4.680582 | -1.997178 | -0.961499 |
| C | -4.889801 | -3.792249 | 1.167550  |
| H | -2.931343 | -4.484900 | 0.574938  |
| C | -5.820059 | -2.016173 | -0.163692 |
| H | -4.595419 | -1.297426 | -1.789900 |
| C | -5.935278 | -2.898445 | 0.913293  |
| H | -4.969614 | -4.488110 | 1.998108  |
| H | -6.625478 | -1.318733 | -0.372910 |
| C | -7.142640 | -2.867337 | 1.812183  |
| H | -7.985831 | -2.369970 | 1.329042  |
| H | -7.449325 | -3.876175 | 2.098750  |
| H | -6.912365 | -2.319816 | 2.732464  |
| N | -1.280491 | -1.502400 | -1.275518 |
| H | -1.797080 | -0.659091 | -1.548191 |
| S | 2.130816  | -1.774760 | 0.804049  |
| C | 3.187578  | -2.426732 | -0.459670 |
| C | 4.305926  | -3.187822 | -0.086476 |
| C | 2.928779  | -2.111676 | -1.808924 |
| C | 5.150649  | -3.651176 | -1.096207 |
| C | 3.772154  | -2.617447 | -2.801970 |
| C | 4.878146  | -3.374050 | -2.431534 |
| H | 6.017633  | -4.246471 | -0.828780 |

|   |           |           |           |
|---|-----------|-----------|-----------|
| H | 3.582826  | -2.417144 | -3.848381 |
| H | 5.536764  | -3.756506 | -3.204755 |
| C | 4.594881  | -3.522763 | 1.353974  |
| H | 4.745178  | -2.619444 | 1.952982  |
| H | 3.765439  | -4.075865 | 1.804602  |
| H | 5.496810  | -4.132794 | 1.424336  |
| O | 1.872064  | -1.303442 | -2.026174 |
| C | 1.605775  | -0.830266 | -3.361333 |
| C | 0.852863  | 0.474953  | -3.200636 |
| C | 0.821992  | -1.872566 | -4.142316 |
| H | 2.570905  | -0.624044 | -3.842710 |
| H | 1.445213  | 1.195884  | -2.630411 |
| H | 0.637068  | 0.905251  | -4.182086 |
| H | -0.094645 | 0.309935  | -2.679698 |
| H | -0.161314 | -2.011311 | -3.685825 |
| H | 0.685453  | -1.535631 | -5.173384 |
| H | 1.340214  | -2.834891 | -4.160662 |
| H | -0.126526 | -0.338593 | -0.079431 |
| O | -2.573882 | 1.092189  | -1.278858 |
| S | -3.783117 | 1.730465  | -1.869653 |
| O | -4.529552 | 0.862763  | -2.777594 |
| O | -3.556273 | 3.112517  | -2.307636 |
| C | -4.883481 | 1.940698  | -0.417384 |
| F | -4.292224 | 2.711352  | 0.495496  |
| F | -6.024506 | 2.513986  | -0.786424 |
| F | -5.158778 | 0.767058  | 0.147201  |
| S | 2.344409  | 0.725996  | 0.675851  |
| C | 4.007506  | 0.459603  | 0.126452  |
| C | 4.343971  | 0.573797  | -1.224311 |
| C | 4.965122  | 0.039727  | 1.054684  |

|   |           |           |           |
|---|-----------|-----------|-----------|
| C | 5.625936  | 0.240322  | -1.640945 |
| H | 3.597634  | 0.906309  | -1.940822 |
| C | 6.241769  | -0.299485 | 0.622147  |
| H | 4.689513  | -0.047733 | 2.103660  |
| C | 6.584388  | -0.220834 | -0.731236 |
| H | 5.882031  | 0.313946  | -2.694175 |
| H | 6.977768  | -0.646564 | 1.342250  |
| C | 7.939588  | -0.666459 | -1.209078 |
| H | 8.255725  | -0.102132 | -2.088996 |
| H | 7.904406  | -1.725195 | -1.488656 |
| H | 8.694753  | -0.552407 | -0.428705 |
| C | 2.437879  | -0.682696 | 4.346659  |
| C | 2.973332  | 0.600671  | 4.311604  |
| C | 2.176740  | 1.694385  | 3.956859  |
| C | 0.829688  | 1.487493  | 3.664140  |
| C | 0.286091  | 0.203107  | 3.705271  |
| C | 1.091786  | -0.883271 | 4.039167  |
| H | 3.065591  | -1.526799 | 4.617182  |
| H | 4.022972  | 0.758171  | 4.554520  |
| H | 0.206761  | 2.332172  | 3.382794  |
| H | -0.764807 | 0.052183  | 3.476326  |
| H | 0.666743  | -1.882163 | 4.073427  |
| C | 2.798202  | 3.057186  | 3.787550  |
| C | 3.691863  | 3.108063  | 2.532788  |
| H | 2.021200  | 3.821236  | 3.700736  |
| H | 3.428300  | 3.306780  | 4.647036  |
| C | 2.948454  | 2.948268  | 1.280833  |
| H | 4.471815  | 2.338279  | 2.584450  |
| H | 4.202170  | 4.075672  | 2.468889  |
| C | 2.351611  | 3.059301  | 0.212998  |

|   |           |          |           |
|---|-----------|----------|-----------|
| C | 1.712476  | 3.383502 | -1.024879 |
| C | 2.483896  | 3.854324 | -2.096147 |
| C | 0.326080  | 3.208089 | -1.184989 |
| C | 1.881820  | 4.144883 | -3.314239 |
| H | 3.553060  | 3.977421 | -1.959158 |
| C | -0.270100 | 3.511683 | -2.407228 |
| C | 0.507547  | 3.972502 | -3.466940 |
| H | 2.484520  | 4.501517 | -4.142030 |
| H | -1.341539 | 3.366914 | -2.523214 |
| H | 0.033448  | 4.195414 | -4.416911 |
| S | -1.015317 | 3.643637 | 1.087261  |
| O | 0.113955  | 4.359803 | 1.667270  |
| O | -1.835142 | 2.783826 | 1.930349  |
| C | -2.050470 | 4.843234 | 0.272937  |
| H | -1.411795 | 5.471942 | -0.348050 |
| H | -2.525639 | 5.435197 | 1.056157  |
| H | -2.792462 | 4.321733 | -0.333134 |
| N | -0.442446 | 2.641273 | -0.125502 |
| H | -1.224625 | 2.065797 | -0.472215 |

Vibrational frequencies

|           |         |         |
|-----------|---------|---------|
| -229.2380 | 13.3033 | 20.3971 |
| 23.0609   | 28.6165 | 32.8561 |
| 33.8094   | 41.5077 | 44.4093 |
| 47.3127   | 49.0478 | 53.3344 |
| 55.6707   | 57.7964 | 60.0691 |
| 63.1254   | 65.1626 | 67.5814 |
| 69.9168   | 71.0665 | 73.1429 |
| 75.5302   | 78.2151 | 79.7278 |
| 83.1545   | 89.0780 | 90.9661 |
| 93.5891   | 98.4420 | 99.6486 |

## M06-2x TS2R

Cartesian coordinates

|   |           |          |           |
|---|-----------|----------|-----------|
| C | -0.379886 | 3.346705 | -0.104722 |
| C | -0.881395 | 2.048106 | -0.131697 |
| C | -1.765845 | 1.632569 | -1.124855 |
| C | -2.138020 | 2.551046 | -2.103885 |
| C | -1.627258 | 3.853555 | -2.088942 |
| C | -0.748273 | 4.261811 | -1.088326 |
| C | 0.531189  | 3.557713 | 1.077620  |
| C | 0.761698  | 2.127875 | 1.626554  |
| C | -0.355897 | 1.229135 | 1.027264  |
| H | -2.167129 | 0.621430 | -1.117580 |
| H | -2.831511 | 2.252242 | -2.884037 |
| H | -1.924920 | 4.554803 | -2.862969 |
| H | -0.352867 | 5.273580 | -1.079902 |
| H | 1.463795  | 4.060160 | 0.806122  |
| H | 0.761287  | 2.081104 | 2.715526  |
| H | 0.036702  | 4.159020 | 1.845525  |
| S | -2.391416 | 1.876669 | 2.757252  |
| O | -1.609419 | 3.039628 | 3.170463  |
| O | -3.101400 | 1.074984 | 3.748027  |
| C | -3.577396 | 2.406894 | 1.549100  |
| C | -3.501731 | 3.688408 | 1.014197  |
| C | -4.507719 | 1.478346 | 1.094291  |
| C | -4.372743 | 4.034689 | -0.010199 |
| H | -2.761942 | 4.388096 | 1.388329  |
| C | -5.363585 | 1.839750 | 0.060600  |
| H | -4.553073 | 0.488528 | 1.534528  |
| C | -5.300726 | 3.114072 | -0.510563 |
| H | -4.318063 | 5.028983 | -0.445110 |



|   |           |           |           |
|---|-----------|-----------|-----------|
| H | -6.083971 | 1.116699  | -0.310693 |
| C | -6.189283 | 3.490596  | -1.666201 |
| H | -6.638684 | 4.475308  | -1.514369 |
| H | -5.606529 | 3.536579  | -2.592428 |
| H | -6.989436 | 2.761557  | -1.807094 |
| N | -1.351217 | 0.815699  | 2.030057  |
| H | -1.883089 | -0.002459 | 1.712140  |
| S | 2.472190  | 1.617195  | 1.125575  |
| C | 3.148329  | 0.879235  | 2.589101  |
| C | 4.380422  | 1.370669  | 3.051376  |
| C | 2.475060  | -0.158767 | 3.260861  |
| C | 4.891068  | 0.854450  | 4.243347  |
| C | 2.990499  | -0.630758 | 4.473028  |
| C | 4.189296  | -0.114882 | 4.952406  |
| H | 5.836545  | 1.229704  | 4.620500  |
| H | 2.474077  | -1.397590 | 5.034977  |
| H | 4.585070  | -0.489326 | 5.890851  |
| C | 5.149875  | 2.421847  | 2.293761  |
| H | 5.385608  | 2.083221  | 1.279686  |
| H | 4.575153  | 3.347630  | 2.201059  |
| H | 6.086823  | 2.644169  | 2.806547  |
| O | 1.368216  | -0.634316 | 2.662249  |
| C | 0.735428  | -1.821822 | 3.187060  |
| C | 0.066129  | -2.473173 | 1.995562  |
| C | -0.231580 | -1.467257 | 4.305553  |
| H | 1.524801  | -2.485830 | 3.560757  |
| H | 0.800616  | -2.723107 | 1.225403  |
| H | -0.457580 | -3.384570 | 2.294585  |
| H | -0.665744 | -1.783482 | 1.566542  |
| H | -1.038851 | -0.839945 | 3.921570  |

|   |           |           |           |
|---|-----------|-----------|-----------|
| H | -0.661774 | -2.383398 | 4.718533  |
| H | 0.269932  | -0.927493 | 5.113069  |
| H | 0.057390  | 0.277802  | 0.680353  |
| S | 2.279528  | 0.122818  | -0.891981 |
| C | 2.658737  | 1.578439  | -1.852159 |
| C | 1.644170  | 2.300085  | -2.482856 |
| C | 3.991309  | 1.985618  | -1.970276 |
| C | 1.972973  | 3.421608  | -3.237588 |
| H | 0.606844  | 1.991754  | -2.382426 |
| C | 4.301555  | 3.112675  | -2.720938 |
| H | 4.771264  | 1.424846  | -1.460500 |
| C | 3.289091  | 3.843277  | -3.369854 |
| H | 1.178049  | 3.984729  | -3.719151 |
| H | 5.336072  | 3.433375  | -2.803791 |
| C | 3.665756  | 5.056024  | -4.186379 |
| H | 2.759481  | 5.455889  | -4.641212 |
| H | 4.140494  | 5.785412  | -3.530089 |
| H | 4.369143  | 4.748497  | -4.960184 |
| O | -2.714917 | -3.572624 | 0.279617  |
| S | -3.316852 | -2.384065 | 0.915131  |
| O | -2.755442 | -1.115840 | 0.395470  |
| O | -3.483392 | -2.437671 | 2.364688  |
| C | -5.030575 | -2.384847 | 0.255659  |
| F | -5.643323 | -3.520535 | 0.570734  |
| F | -5.729795 | -1.369503 | 0.764547  |
| F | -5.023624 | -2.259298 | -1.073159 |
| C | 5.780751  | -1.292091 | 0.895700  |
| C | 5.685378  | -1.600045 | -0.457093 |
| C | 4.672295  | -2.441617 | -0.926661 |
| C | 3.749737  | -2.968394 | -0.021581 |

|   |           |           |           |
|---|-----------|-----------|-----------|
| C | 3.848856  | -2.665318 | 1.336208  |
| C | 4.865619  | -1.833838 | 1.797511  |
| H | 6.572610  | -0.640023 | 1.253423  |
| H | 6.405642  | -1.186204 | -1.160471 |
| H | 2.950888  | -3.616459 | -0.377068 |
| H | 3.134227  | -3.089775 | 2.036505  |
| H | 4.945926  | -1.601410 | 2.854147  |
| C | 4.540895  | -2.697121 | -2.405620 |
| C | 4.028575  | -1.446512 | -3.141221 |
| H | 3.849898  | -3.523578 | -2.593846 |
| H | 5.511982  | -2.959166 | -2.837412 |
| C | 2.640129  | -1.117905 | -2.793156 |
| H | 4.668145  | -0.581645 | -2.930958 |
| H | 4.044405  | -1.607777 | -4.224262 |
| C | 1.412148  | -1.048521 | -2.841883 |
| C | 0.007533  | -0.977315 | -3.068652 |
| C | -0.482362 | -0.129290 | -4.073623 |
| C | -0.883419 | -1.779203 | -2.333134 |
| C | -1.844735 | -0.075057 | -4.334789 |
| H | 0.218061  | 0.479854  | -4.635403 |
| C | -2.246472 | -1.723649 | -2.610324 |
| C | -2.724911 | -0.869265 | -3.600415 |
| H | -2.219766 | 0.585943  | -5.108300 |
| H | -2.922208 | -2.348958 | -2.037990 |
| H | -3.790864 | -0.830651 | -3.799477 |
| S | 0.194177  | -4.126916 | -1.674773 |
| O | 1.091638  | -3.982705 | -2.814113 |
| O | 0.689036  | -4.693561 | -0.427322 |
| C | -1.231378 | -5.057873 | -2.191409 |
| H | -1.642237 | -4.587613 | -3.085693 |

|   |           |           |           |
|---|-----------|-----------|-----------|
| H | -0.890394 | -6.069698 | -2.412890 |
| H | -1.951696 | -5.048540 | -1.372248 |
| N | -0.383775 | -2.599944 | -1.282635 |
| H | -1.065451 | -2.706904 | -0.522655 |

Vibrational frequencies

|           |          |          |
|-----------|----------|----------|
| -237.2933 | 16.2742  | 19.7756  |
| 22.9963   | 29.0988  | 29.9020  |
| 33.3946   | 36.5893  | 40.7900  |
| 43.1896   | 45.4761  | 48.7175  |
| 49.7909   | 53.7111  | 56.5570  |
| 58.6538   | 59.6519  | 65.5191  |
| 69.9505   | 71.8713  | 73.8356  |
| 75.2782   | 79.7712  | 81.9682  |
| 82.6099   | 86.6221  | 90.4620  |
| 95.4533   | 100.7955 | 103.0842 |

**$\omega$ B97X-D TS2S**

Cartesian coordinates

|   |           |           |          |
|---|-----------|-----------|----------|
| C | -1.184706 | -2.694440 | 1.919038 |
| C | -1.508176 | -1.539194 | 1.218903 |
| C | -2.563576 | -0.725486 | 1.615426 |
| C | -3.296652 | -1.089005 | 2.740620 |
| C | -2.967335 | -2.242871 | 3.456915 |
| C | -1.909156 | -3.053753 | 3.051480 |
| C | -0.049872 | -3.433021 | 1.260626 |
| C | 0.466839  | -2.454731 | 0.177238 |
| C | -0.617861 | -1.352661 | 0.011572 |
| H | -2.806907 | 0.170764  | 1.057297 |
| H | -4.126291 | -0.469958 | 3.064750 |
| H | -3.542088 | -2.511052 | 4.337967 |
| H | -1.660899 | -3.953960 | 3.605967 |

|   |           |           |           |
|---|-----------|-----------|-----------|
| H | 0.729644  | -3.724797 | 1.969689  |
| H | 0.642952  | -2.947724 | -0.773395 |
| H | -0.409109 | -4.345474 | 0.775542  |
| S | -2.181766 | -2.723453 | -1.813333 |
| O | -1.370154 | -3.914718 | -1.575069 |
| O | -2.581038 | -2.373258 | -3.170749 |
| C | -3.661930 | -2.878053 | -0.842854 |
| C | -3.744863 | -3.867742 | 0.131991  |
| C | -4.702095 | -1.979051 | -1.050970 |
| C | -4.886061 | -3.943706 | 0.917617  |
| H | -2.926612 | -4.564587 | 0.269275  |
| C | -5.838170 | -2.075437 | -0.257680 |
| H | -4.629282 | -1.210450 | -1.814532 |
| C | -5.942032 | -3.044637 | 0.742838  |
| H | -4.952510 | -4.708028 | 1.685930  |
| H | -6.650325 | -1.371782 | -0.409592 |
| C | -7.149687 | -3.103368 | 1.640115  |
| H | -8.014171 | -2.619530 | 1.180957  |
| H | -7.417176 | -4.136291 | 1.877925  |
| H | -6.943520 | -2.591526 | 2.586532  |
| N | -1.307952 | -1.416251 | -1.289157 |
| H | -1.823601 | -0.550292 | -1.477623 |
| S | 2.134824  | -1.830021 | 0.694340  |
| C | 3.193116  | -2.433030 | -0.591354 |
| C | 4.312310  | -3.202690 | -0.239362 |
| C | 2.949921  | -2.059616 | -1.929534 |
| C | 5.174326  | -3.610207 | -1.257108 |
| C | 3.812484  | -2.511078 | -2.930899 |
| C | 4.919493  | -3.273390 | -2.580800 |
| H | 6.045314  | -4.207903 | -1.007329 |

|   |           |           |           |
|---|-----------|-----------|-----------|
| H | 3.636606  | -2.267573 | -3.970347 |
| H | 5.593114  | -3.611666 | -3.360591 |
| C | 4.598766  | -3.592955 | 1.187663  |
| H | 4.794739  | -2.714054 | 1.809107  |
| H | 3.753894  | -4.124002 | 1.633910  |
| H | 5.476282  | -4.240466 | 1.234187  |
| O | 1.890768  | -1.257156 | -2.126356 |
| C | 1.632037  | -0.692510 | -3.427184 |
| C | 0.888038  | 0.604110  | -3.177992 |
| C | 0.841792  | -1.670631 | -4.282724 |
| H | 2.597659  | -0.461513 | -3.893174 |
| H | 1.474793  | 1.270973  | -2.542759 |
| H | 0.696321  | 1.111636  | -4.126578 |
| H | -0.068812 | 0.411377  | -2.688696 |
| H | -0.142224 | -1.841495 | -3.841469 |
| H | 0.706714  | -1.254554 | -5.284632 |
| H | 1.356138  | -2.631363 | -4.378718 |
| H | -0.165432 | -0.356475 | -0.002366 |
| O | -2.543071 | 1.204207  | -1.100548 |
| S | -3.716547 | 1.823695  | -1.776848 |
| O | -4.374209 | 0.942194  | -2.739788 |
| O | -3.476967 | 3.205843  | -2.207082 |
| C | -4.941887 | 2.017799  | -0.407212 |
| F | -4.488492 | 2.879202  | 0.505580  |
| F | -6.094586 | 2.477893  | -0.889575 |
| F | -5.168961 | 0.852941  | 0.200939  |
| S | 2.360767  | 0.657098  | 0.707426  |
| C | 4.029270  | 0.450452  | 0.157763  |
| C | 4.370011  | 0.649097  | -1.182057 |
| C | 4.996216  | 0.011985  | 1.065937  |

|   |           |           |           |
|---|-----------|-----------|-----------|
| C | 5.661152  | 0.380453  | -1.609262 |
| H | 3.621092  | 0.994257  | -1.886671 |
| C | 6.284493  | -0.262144 | 0.622386  |
| H | 4.726182  | -0.141482 | 2.106797  |
| C | 6.630149  | -0.100805 | -0.721565 |
| H | 5.917128  | 0.522498  | -2.655008 |
| H | 7.025892  | -0.622935 | 1.328470  |
| C | 7.998731  | -0.476155 | -1.220111 |
| H | 8.349910  | 0.223711  | -1.983688 |
| H | 7.967559  | -1.471778 | -1.676068 |
| H | 8.730444  | -0.502239 | -0.409840 |
| C | 2.444013  | -0.991475 | 4.505109  |
| C | 2.911507  | 0.316377  | 4.438423  |
| C | 2.056516  | 1.365764  | 4.088440  |
| C | 0.716563  | 1.082660  | 3.824644  |
| C | 0.240135  | -0.224506 | 3.904060  |
| C | 1.102991  | -1.264647 | 4.236699  |
| H | 3.121909  | -1.796910 | 4.772236  |
| H | 3.957236  | 0.525831  | 4.657610  |
| H | 0.039472  | 1.883540  | 3.542595  |
| H | -0.805663 | -0.428606 | 3.705141  |
| H | 0.726640  | -2.282558 | 4.290976  |
| C | 2.596176  | 2.767853  | 3.947413  |
| C | 3.546630  | 2.924060  | 2.744005  |
| H | 1.776753  | 3.483348  | 3.841519  |
| H | 3.163754  | 3.044094  | 4.841452  |
| C | 2.875723  | 2.818322  | 1.444616  |
| H | 4.356169  | 2.187730  | 2.791356  |
| H | 4.016049  | 3.913151  | 2.769802  |
| C | 2.328411  | 3.070093  | 0.376098  |

|   |           |          |           |
|---|-----------|----------|-----------|
| C | 1.735829  | 3.458781 | -0.859422 |
| C | 2.549656  | 3.914037 | -1.905747 |
| C | 0.344102  | 3.359949 | -1.046314 |
| C | 1.985553  | 4.260575 | -3.126630 |
| H | 3.619767  | 3.983966 | -1.749513 |
| C | -0.209858 | 3.709661 | -2.274821 |
| C | 0.608658  | 4.152414 | -3.309491 |
| H | 2.620044  | 4.608434 | -3.933720 |
| H | -1.283283 | 3.615377 | -2.414675 |
| H | 0.165285  | 4.415560 | -4.263792 |
| S | -1.020606 | 3.845422 | 1.205693  |
| O | 0.118338  | 4.561609 | 1.764103  |
| O | -1.839815 | 3.001915 | 2.067219  |
| C | -2.064058 | 5.042416 | 0.395487  |
| H | -1.444304 | 5.635789 | -0.276043 |
| H | -2.494209 | 5.675397 | 1.172639  |
| H | -2.841836 | 4.519421 | -0.160364 |
| N | -0.469806 | 2.833109 | -0.004423 |
| H | -1.243887 | 2.245734 | -0.348296 |

Vibrational frequencies

|           |          |          |
|-----------|----------|----------|
| -271.5529 | 19.8570  | 23.3317  |
| 27.3532   | 28.7922  | 33.0265  |
| 36.5717   | 41.0177  | 43.0532  |
| 44.3843   | 47.6509  | 49.8800  |
| 53.6338   | 57.2183  | 58.9571  |
| 60.9531   | 63.2685  | 68.8538  |
| 71.2533   | 71.9000  | 74.0614  |
| 77.6040   | 82.1971  | 86.5415  |
| 89.3441   | 91.0260  | 95.6995  |
| 99.4632   | 106.9235 | 108.6022 |



**ωB97X-D TS2R**

Cartesian coordinates

|   |           |          |           |
|---|-----------|----------|-----------|
| C | -0.607391 | 3.427721 | -0.126845 |
| C | -1.071992 | 2.118614 | -0.116928 |
| C | -1.956771 | 1.655293 | -1.084175 |
| C | -2.391397 | 2.542709 | -2.062691 |
| C | -1.940009 | 3.865303 | -2.069906 |
| C | -1.045273 | 4.317223 | -1.103544 |
| C | 0.387475  | 3.668344 | 0.977836  |
| C | 0.592303  | 2.273240 | 1.623917  |
| C | -0.501292 | 1.334843 | 1.039060  |
| H | -2.313837 | 0.630017 | -1.056282 |
| H | -3.090029 | 2.206633 | -2.821507 |
| H | -2.289855 | 4.547766 | -2.838248 |
| H | -0.682950 | 5.340658 | -1.123752 |
| H | 1.320404  | 4.092483 | 0.593613  |
| H | 0.517248  | 2.311033 | 2.710084  |
| H | -0.006626 | 4.361401 | 1.725601  |
| S | -2.570651 | 1.923593 | 2.746313  |
| O | -1.881855 | 3.173936 | 3.052541  |
| O | -3.191175 | 1.149089 | 3.814520  |
| C | -3.824031 | 2.261799 | 1.532389  |
| C | -3.949092 | 3.534807 | 0.990514  |
| C | -4.621584 | 1.208855 | 1.094794  |
| C | -4.887306 | 3.747663 | -0.011300 |
| H | -3.304616 | 4.335285 | 1.334172  |
| C | -5.544115 | 1.436130 | 0.084017  |
| H | -4.510574 | 0.219398 | 1.521234  |
| C | -5.686689 | 2.704517 | -0.486923 |
| H | -4.987585 | 4.738016 | -0.445265 |

|   |           |           |           |
|---|-----------|-----------|-----------|
| H | -6.156102 | 0.611728  | -0.268514 |
| C | -6.654902 | 2.938067  | -1.616370 |
| H | -7.135625 | 3.916039  | -1.531416 |
| H | -6.130957 | 2.912391  | -2.578222 |
| H | -7.432541 | 2.171446  | -1.641039 |
| N | -1.465277 | 0.901957  | 2.060070  |
| H | -1.907584 | 0.008102  | 1.828160  |
| S | 2.331867  | 1.727526  | 1.314169  |
| C | 2.783958  | 0.765046  | 2.738393  |
| C | 3.803040  | 1.275419  | 3.562879  |
| C | 2.161184  | -0.467647 | 3.017762  |
| C | 4.154975  | 0.550804  | 4.700805  |
| C | 2.550900  | -1.177058 | 4.157323  |
| C | 3.530053  | -0.656712 | 4.990303  |
| H | 4.926620  | 0.935099  | 5.359355  |
| H | 2.105827  | -2.133221 | 4.387982  |
| H | 3.818849  | -1.214025 | 5.875507  |
| C | 4.513468  | 2.569046  | 3.254400  |
| H | 5.025392  | 2.519149  | 2.288644  |
| H | 3.816512  | 3.410696  | 3.210288  |
| H | 5.258422  | 2.782925  | 4.022888  |
| O | 1.245783  | -0.874713 | 2.127867  |
| C | 0.292393  | -1.941988 | 2.363351  |
| C | -0.478261 | -1.807441 | 3.672181  |
| C | 0.904086  | -3.313635 | 2.132262  |
| H | -0.411426 | -1.758481 | 1.549104  |
| H | -0.700477 | -0.758823 | 3.879072  |
| H | -1.428547 | -2.334788 | 3.552298  |
| H | 0.041051  | -2.241388 | 4.528656  |
| H | 1.597024  | -3.608095 | 2.924898  |

|   |           |           |           |
|---|-----------|-----------|-----------|
| H | 0.096879  | -4.051584 | 2.104111  |
| H | 1.419303  | -3.347371 | 1.170596  |
| H | -0.057213 | 0.401976  | 0.692099  |
| S | 2.325279  | 0.378544  | -0.771555 |
| C | 2.644620  | 1.894980  | -1.654885 |
| C | 1.612325  | 2.555187  | -2.321972 |
| C | 3.939882  | 2.417972  | -1.679565 |
| C | 1.881601  | 3.730683  | -3.010585 |
| H | 0.603158  | 2.158768  | -2.293423 |
| C | 4.192682  | 3.598879  | -2.365740 |
| H | 4.738140  | 1.907913  | -1.147764 |
| C | 3.170432  | 4.271315  | -3.043478 |
| H | 1.067824  | 4.243404  | -3.515075 |
| H | 5.198690  | 4.007659  | -2.372298 |
| C | 3.454140  | 5.537839  | -3.806532 |
| H | 2.610390  | 6.230543  | -3.753767 |
| H | 4.341954  | 6.043972  | -3.420710 |
| H | 3.631474  | 5.317248  | -4.864620 |
| O | -2.412945 | -3.700557 | -0.068985 |
| S | -3.102582 | -2.775561 | 0.855070  |
| O | -2.610021 | -1.387075 | 0.747882  |
| O | -3.295068 | -3.280377 | 2.212002  |
| C | -4.809835 | -2.654275 | 0.158715  |
| F | -5.354440 | -3.861787 | 0.035774  |
| F | -5.584188 | -1.918828 | 0.961462  |
| F | -4.789850 | -2.071852 | -1.044008 |
| C | 6.057151  | -0.753708 | 1.032907  |
| C | 5.938037  | -0.985564 | -0.332931 |
| C | 5.041218  | -1.940911 | -0.820669 |
| C | 4.269062  | -2.667234 | 0.085448  |

|   |           |           |           |
|---|-----------|-----------|-----------|
| C | 4.399089  | -2.446831 | 1.454565  |
| C | 5.289163  | -1.490657 | 1.931620  |
| H | 6.754992  | -0.006024 | 1.397701  |
| H | 6.548964  | -0.416989 | -1.030812 |
| H | 3.556490  | -3.402506 | -0.281018 |
| H | 3.795796  | -3.018536 | 2.151468  |
| H | 5.374334  | -1.311215 | 2.997822  |
| C | 4.893796  | -2.145530 | -2.307532 |
| C | 4.244605  | -0.941846 | -3.011121 |
| H | 4.298593  | -3.039122 | -2.514159 |
| H | 5.877626  | -2.293914 | -2.764803 |
| C | 2.825653  | -0.755082 | -2.671571 |
| H | 4.791471  | -0.020567 | -2.784411 |
| H | 4.286586  | -1.081039 | -4.096095 |
| C | 1.605882  | -0.830875 | -2.817009 |
| C | 0.210475  | -0.852295 | -3.075606 |
| C | -0.321130 | 0.048304  | -4.011198 |
| C | -0.636357 | -1.773729 | -2.430679 |
| C | -1.679691 | 0.048685  | -4.287292 |
| H | 0.346048  | 0.744013  | -4.507749 |
| C | -1.999686 | -1.757050 | -2.710717 |
| C | -2.517571 | -0.846173 | -3.626248 |
| H | -2.084331 | 0.750545  | -5.007423 |
| H | -2.648299 | -2.459632 | -2.202421 |
| H | -3.583490 | -0.844682 | -3.827308 |
| S | 0.634199  | -4.086854 | -2.047530 |
| O | 1.414409  | -3.744110 | -3.228353 |
| O | 1.287969  | -4.699621 | -0.899852 |
| C | -0.723689 | -5.129467 | -2.544055 |
| H | -1.253812 | -4.637092 | -3.360099 |

|   |           |           |           |
|---|-----------|-----------|-----------|
| H | -0.303780 | -6.078001 | -2.879758 |
| H | -1.380195 | -5.269978 | -1.684771 |
| N | -0.097224 | -2.682272 | -1.479044 |
| H | -0.791877 | -2.944848 | -0.767557 |

Vibrational frequencies

|           |          |          |
|-----------|----------|----------|
| -294.0920 | 14.9140  | 25.4319  |
| 27.4509   | 28.9416  | 31.6782  |
| 33.9423   | 35.8784  | 39.3923  |
| 42.2880   | 43.3339  | 44.3018  |
| 47.1381   | 48.0451  | 54.0439  |
| 56.7237   | 57.8230  | 59.3107  |
| 62.5953   | 64.4793  | 68.2763  |
| 70.2830   | 78.1914  | 80.2454  |
| 81.0285   | 86.3819  | 88.2655  |
| 96.5741   | 100.4894 | 102.0888 |

**TS2S( $\Phi_1=-60^\circ/\Phi_2=9^\circ$ )**

Cartesian coordinates

|   |          |           |          |
|---|----------|-----------|----------|
| C | 2.698445 | 1.506056  | 2.195106 |
| C | 2.309371 | 0.497678  | 1.306940 |
| C | 2.443687 | -0.847074 | 1.637943 |
| C | 2.978089 | -1.179903 | 2.884572 |
| C | 3.374970 | -0.175537 | 3.775074 |
| C | 3.240326 | 1.175027  | 3.435641 |
| C | 2.472340 | 2.868086  | 1.578649 |
| C | 1.521306 | 2.561446  | 0.394403 |
| C | 1.816283 | 1.089655  | 0.000597 |
| H | 2.173511 | -1.614111 | 0.923870 |
| H | 3.102024 | -2.224660 | 3.150918 |
| H | 3.793868 | -0.446933 | 4.739839 |
| H | 3.554921 | 1.950526  | 4.128135 |

|   |           |           |           |
|---|-----------|-----------|-----------|
| H | 2.067186  | 3.606343  | 2.275352  |
| H | 1.601501  | 3.251497  | -0.440068 |
| H | 3.405712  | 3.278061  | 1.181171  |
| S | 4.187655  | 1.756683  | -1.361102 |
| O | 3.898218  | 3.201778  | -1.306348 |
| O | 4.747335  | 1.175336  | -2.590643 |
| C | 5.283051  | 1.375106  | 0.002983  |
| C | 5.893100  | 2.403922  | 0.718929  |
| C | 5.491348  | 0.035676  | 0.338620  |
| C | 6.699723  | 2.080175  | 1.809895  |
| H | 5.727533  | 3.435966  | 0.431328  |
| C | 6.293189  | -0.266604 | 1.431827  |
| H | 5.024240  | -0.758372 | -0.228603 |
| C | 6.898177  | 0.746835  | 2.191407  |
| H | 7.171615  | 2.876792  | 2.377996  |
| H | 6.434806  | -1.307237 | 1.706698  |
| C | 7.707838  | 0.398204  | 3.414880  |
| H | 8.343368  | -0.474649 | 3.237017  |
| H | 8.343051  | 1.229702  | 3.731191  |
| H | 7.042975  | 0.149117  | 4.251132  |
| N | 2.759687  | 0.936281  | -1.134469 |
| H | 2.899264  | -0.057967 | -1.365780 |
| S | -0.210558 | 2.719901  | 1.076885  |
| C | -1.152866 | 3.666491  | -0.089846 |
| C | -2.038427 | 4.632365  | 0.445348  |
| C | -1.109032 | 3.413873  | -1.484345 |
| C | -2.840107 | 5.362989  | -0.434606 |
| C | -1.902755 | 4.192932  | -2.338163 |
| C | -2.762656 | 5.149565  | -1.809252 |
| H | -3.519709 | 6.109704  | -0.036959 |

|   |           |           |           |
|---|-----------|-----------|-----------|
| H | -1.865675 | 4.047807  | -3.408606 |
| H | -3.380530 | 5.734557  | -2.483584 |
| C | -2.146758 | 4.882501  | 1.931380  |
| H | -2.507043 | 3.996134  | 2.466283  |
| H | -1.178390 | 5.145238  | 2.368019  |
| H | -2.845638 | 5.697784  | 2.129809  |
| O | -0.303555 | 2.408930  | -1.900805 |
| C | -0.046914 | 2.229214  | -3.326728 |
| C | 0.410761  | 0.794474  | -3.516790 |
| C | 0.988107  | 3.255960  | -3.772907 |
| H | -0.992431 | 2.361072  | -3.863280 |
| H | -0.337976 | 0.095337  | -3.144261 |
| H | 0.557990  | 0.603510  | -4.584139 |
| H | 1.353803  | 0.620608  | -2.998688 |
| H | 1.908534  | 3.123886  | -3.196846 |
| H | 1.214385  | 3.125519  | -4.835140 |
| H | 0.626417  | 4.277035  | -3.621804 |
| H | 0.911405  | 0.601316  | -0.364499 |
| O | 2.880564  | -1.868107 | -1.416389 |
| S | 3.841454  | -2.989215 | -1.643108 |
| O | 5.233191  | -2.554956 | -1.884559 |
| O | 3.325972  | -4.069874 | -2.504188 |
| C | 3.929075  | -3.776346 | 0.050613  |
| F | 2.693829  | -3.978323 | 0.559491  |
| F | 4.553258  | -4.960219 | -0.003704 |
| F | 4.598196  | -2.987332 | 0.913531  |
| S | -1.468270 | 0.394181  | 1.383950  |
| C | -2.560323 | 0.713587  | 0.028892  |
| C | -2.404648 | 0.043073  | -1.192643 |
| C | -3.589728 | 1.654721  | 0.183173  |

|   |           |           |           |
|---|-----------|-----------|-----------|
| C | -3.269246 | 0.319798  | -2.242666 |
| H | -1.621633 | -0.695833 | -1.308516 |
| C | -4.437802 | 1.938441  | -0.885007 |
| H | -3.720826 | 2.159861  | 1.133270  |
| C | -4.286809 | 1.282098  | -2.114906 |
| H | -3.148342 | -0.216514 | -3.178557 |
| H | -5.217270 | 2.684594  | -0.764091 |
| C | -5.164479 | 1.626718  | -3.290370 |
| H | -5.377225 | 0.746157  | -3.903098 |
| H | -4.660592 | 2.358434  | -3.933675 |
| H | -6.112483 | 2.068135  | -2.971675 |
| C | -0.055426 | -2.617946 | -2.569788 |
| C | -0.083819 | -3.006282 | -1.230849 |
| C | -1.276015 | -3.442593 | -0.635812 |
| C | -2.437969 | -3.487152 | -1.412162 |
| C | -2.417055 | -3.092678 | -2.752305 |
| C | -1.226369 | -2.655752 | -3.335539 |
| H | 0.886989  | -2.294710 | -2.997516 |
| H | 0.838814  | -2.980436 | -0.663594 |
| H | -3.364497 | -3.825964 | -0.967400 |
| H | -3.337441 | -3.119752 | -3.327845 |
| H | -1.206174 | -2.347997 | -4.377137 |
| C | -1.297565 | -3.854504 | 0.819455  |
| C | -0.986350 | -2.697509 | 1.798858  |
| H | -2.267954 | -4.287966 | 1.076251  |
| H | -0.534634 | -4.622018 | 0.996569  |
| C | -2.061104 | -1.681075 | 1.885763  |
| H | -0.048014 | -2.210593 | 1.525149  |
| H | -0.852703 | -3.100550 | 2.809531  |
| C | -3.204898 | -1.313099 | 2.205989  |



|   |           |           |           |
|---|-----------|-----------|-----------|
| C | -4.411232 | -0.688500 | 2.574846  |
| C | -4.533344 | -0.148840 | 3.875823  |
| C | -5.460550 | -0.489341 | 1.639378  |
| C | -5.649317 | 0.597572  | 4.226307  |
| H | -3.726982 | -0.306815 | 4.583073  |
| C | -6.572719 | 0.269587  | 2.006950  |
| C | -6.662663 | 0.818624  | 3.286275  |
| H | -5.729001 | 1.016723  | 5.223321  |
| H | -7.366463 | 0.431054  | 1.284550  |
| H | -7.531951 | 1.410313  | 3.553687  |
| S | -5.762373 | -2.651190 | 0.048035  |
| O | -4.984551 | -3.471130 | 0.983096  |
| O | -5.633996 | -2.822388 | -1.402381 |
| C | -7.498433 | -2.816101 | 0.498414  |
| H | -7.615377 | -2.525667 | 1.542978  |
| H | -7.763886 | -3.865269 | 0.361088  |
| H | -8.090419 | -2.177880 | -0.158019 |
| N | -5.350579 | -1.038486 | 0.334614  |
| H | -5.656713 | -0.438753 | -0.428033 |

Vibrational frequencies

|           |         |         |
|-----------|---------|---------|
| -176.1713 | 15.7344 | 18.4209 |
| 25.5071   | 28.4895 | 30.1851 |
| 34.4282   | 36.0575 | 39.2145 |
| 43.1078   | 43.7118 | 46.0009 |
| 49.0406   | 51.6273 | 55.0484 |
| 58.1845   | 60.4066 | 61.9752 |
| 63.5926   | 67.0682 | 69.9935 |
| 71.2872   | 73.1668 | 74.5734 |
| 76.3745   | 79.5376 | 79.7606 |
| 84.2436   | 87.4892 | 89.8670 |

**TS2S( $\Phi 1=-118^\circ/\Phi 2=-62^\circ$ )**

Cartesian coordinates

|   |           |           |           |
|---|-----------|-----------|-----------|
| C | -2.524890 | 0.841932  | -2.668094 |
| C | -2.424118 | 0.379128  | -1.351228 |
| C | -2.732819 | -0.939414 | -1.025162 |
| C | -3.164195 | -1.793442 | -2.041612 |
| C | -3.268128 | -1.336092 | -3.360994 |
| C | -2.945325 | -0.015356 | -3.684515 |
| C | -2.143951 | 2.301418  | -2.756678 |
| C | -1.402016 | 2.542958  | -1.419001 |
| C | -1.953553 | 1.483611  | -0.421437 |
| H | -2.636534 | -1.285885 | -0.004821 |
| H | -3.414724 | -2.822112 | -1.805556 |
| H | -3.599890 | -2.015425 | -4.141225 |
| H | -3.020727 | 0.336426  | -4.709737 |
| H | -1.538061 | 2.543459  | -3.634035 |
| H | -1.474209 | 3.555495  | -1.029607 |
| H | -3.037834 | 2.930254  | -2.780088 |
| S | -4.503681 | 2.474708  | 0.141207  |
| O | -4.454584 | 3.324361  | -1.060293 |
| O | -5.061543 | 3.011995  | 1.391345  |
| C | -5.410462 | 0.985100  | -0.267406 |
| C | -5.847675 | 0.778166  | -1.574598 |
| C | -5.609591 | 0.023976  | 0.726326  |
| C | -6.487879 | -0.417664 | -1.889595 |
| H | -5.670817 | 1.535066  | -2.329109 |
| C | -6.246644 | -1.166481 | 0.389316  |
| H | -5.246870 | 0.188881  | 1.734547  |
| C | -6.686512 | -1.409838 | -0.919893 |
| H | -6.823044 | -0.589405 | -2.908439 |

|   |           |           |           |
|---|-----------|-----------|-----------|
| H | -6.381737 | -1.926845 | 1.152493  |
| C | -7.312199 | -2.731310 | -1.290984 |
| H | -7.789062 | -3.207466 | -0.429903 |
| H | -8.060679 | -2.614369 | -2.080058 |
| H | -6.547309 | -3.422072 | -1.667356 |
| N | -2.941690 | 2.038237  | 0.531233  |
| H | -2.969930 | 1.514879  | 1.416473  |
| S | 0.410640  | 2.220653  | -1.766563 |
| C | 1.267451  | 3.668493  | -1.202921 |
| C | 2.211133  | 4.263633  | -2.068097 |
| C | 1.079934  | 4.147096  | 0.117171  |
| C | 2.907385  | 5.387436  | -1.612872 |
| C | 1.771726  | 5.294341  | 0.530398  |
| C | 2.676081  | 5.900542  | -0.337951 |
| H | 3.631623  | 5.862577  | -2.266520 |
| H | 1.616695  | 5.708949  | 1.517145  |
| H | 3.212210  | 6.784779  | -0.007024 |
| C | 2.507942  | 3.698994  | -3.436327 |
| H | 2.957345  | 2.702672  | -3.357339 |
| H | 1.601623  | 3.599016  | -4.040936 |
| H | 3.209721  | 4.342640  | -3.971009 |
| O | 0.247235  | 3.422304  | 0.897366  |
| C | 0.030148  | 3.792692  | 2.289821  |
| C | -0.309296 | 2.508055  | 3.025333  |
| C | -1.078113 | 4.836494  | 2.361466  |
| H | 0.970193  | 4.189713  | 2.688303  |
| H | 0.455674  | 1.747045  | 2.855416  |
| H | -0.375576 | 2.706493  | 4.098857  |
| H | -1.270391 | 2.116374  | 2.696159  |
| H | -2.001921 | 4.415112  | 1.954905  |

|   |           |           |           |
|---|-----------|-----------|-----------|
| H | -1.252600 | 5.128128  | 3.401361  |
| H | -0.818824 | 5.732788  | 1.790925  |
| H | -1.173698 | 1.134800  | 0.253682  |
| O | -1.289760 | -0.709350 | 1.967614  |
| S | -2.206267 | -0.581032 | 3.126681  |
| O | -3.228742 | 0.494512  | 2.966854  |
| O | -1.576193 | -0.650141 | 4.458902  |
| C | -3.236850 | -2.137564 | 3.047753  |
| F | -2.480866 | -3.220263 | 3.320789  |
| F | -4.244155 | -2.092203 | 3.928491  |
| F | -3.763257 | -2.311132 | 1.818670  |
| S | 1.224768  | 0.247111  | -0.310573 |
| C | 2.840207  | 0.573489  | -0.989662 |
| C | 3.618751  | 1.602888  | -0.437802 |
| C | 3.346323  | -0.188386 | -2.051669 |
| C | 4.879851  | 1.874546  | -0.962522 |
| H | 3.228166  | 2.195820  | 0.381430  |
| C | 4.623134  | 0.069166  | -2.540459 |
| H | 2.756414  | -0.996977 | -2.463371 |
| C | 5.408117  | 1.106054  | -2.010289 |
| H | 5.465549  | 2.688866  | -0.545662 |
| H | 5.015560  | -0.551117 | -3.340481 |
| C | 6.802924  | 1.361907  | -2.521448 |
| H | 7.537485  | 0.823624  | -1.910000 |
| H | 7.056967  | 2.424746  | -2.474762 |
| H | 6.921721  | 1.020560  | -3.553175 |
| C | 7.539493  | 0.472326  | 2.735758  |
| C | 6.499036  | 0.074298  | 1.893872  |
| C | 5.729643  | -1.058581 | 2.191006  |
| C | 6.024944  | -1.783823 | 3.354121  |

|   |           |           |           |
|---|-----------|-----------|-----------|
| C | 7.063312  | -1.388820 | 4.198864  |
| C | 7.824508  | -0.257840 | 3.891726  |
| H | 8.128710  | 1.350682  | 2.487469  |
| H | 6.279778  | 0.643033  | 0.994672  |
| H | 5.437938  | -2.667053 | 3.594827  |
| H | 7.280656  | -1.965003 | 5.093716  |
| H | 8.634531  | 0.049367  | 4.546728  |
| C | 4.580230  | -1.469276 | 1.300740  |
| C | 3.230567  | -0.940358 | 1.852207  |
| H | 4.722621  | -1.081509 | 0.288920  |
| H | 4.518094  | -2.557397 | 1.214879  |
| C | 2.095384  | -1.351455 | 0.997637  |
| H | 3.265824  | 0.148642  | 1.936582  |
| H | 3.055550  | -1.336066 | 2.859031  |
| C | 1.397599  | -2.233024 | 0.470267  |
| C | 0.450657  | -3.125627 | -0.065343 |
| C | -0.655225 | -3.482539 | 0.736045  |
| C | 0.549835  | -3.646864 | -1.382731 |
| C | -1.646226 | -4.320862 | 0.243619  |
| H | -0.728084 | -3.058287 | 1.726308  |
| C | -0.459819 | -4.477188 | -1.867588 |
| C | -1.551750 | -4.810364 | -1.061569 |
| H | -2.498126 | -4.564323 | 0.867839  |
| H | -0.393662 | -4.860959 | -2.880826 |
| H | -2.327816 | -5.456474 | -1.459129 |
| S | 3.166316  | -3.994297 | -2.042035 |
| O | 3.478297  | -4.022378 | -0.611623 |
| O | 4.026658  | -3.289614 | -2.997233 |
| C | 2.951208  | -5.695149 | -2.595611 |
| H | 2.164106  | -6.153681 | -1.995689 |

|   |          |           |           |
|---|----------|-----------|-----------|
| H | 3.902090 | -6.205728 | -2.435292 |
| H | 2.690379 | -5.688200 | -3.654244 |
| N | 1.636722 | -3.261371 | -2.215815 |
| H | 1.403104 | -3.196563 | -3.204005 |

Vibrational frequencies

|           |         |         |
|-----------|---------|---------|
| -194.4574 | 9.1709  | 10.9671 |
| 16.7865   | 17.7251 | 20.0713 |
| 22.3663   | 26.7558 | 29.7757 |
| 32.4360   | 35.1452 | 36.5740 |
| 38.5384   | 40.8891 | 42.9437 |
| 46.0792   | 48.8803 | 50.1507 |
| 50.6006   | 54.7820 | 57.0794 |
| 59.0588   | 60.6231 | 68.0924 |
| 68.3310   | 70.8331 | 72.7467 |
| 78.7727   | 79.6802 | 81.4507 |

**TS2S( $\Phi1=92^\circ/\Phi2=-134^\circ$ )**

Cartesian coordinates

|   |          |           |           |
|---|----------|-----------|-----------|
| C | 3.600651 | 0.782749  | -2.120144 |
| C | 3.251471 | 0.175817  | -0.910749 |
| C | 3.887883 | 0.523547  | 0.278476  |
| C | 4.871673 | 1.513585  | 0.250951  |
| C | 5.208177 | 2.141865  | -0.955472 |
| C | 4.579258 | 1.776251  | -2.149236 |
| C | 2.810413 | 0.190422  | -3.263595 |
| C | 1.634815 | -0.519682 | -2.546860 |
| C | 2.135257 | -0.830735 | -1.105653 |
| H | 3.643142 | 0.022950  | 1.206817  |
| H | 5.374964 | 1.793155  | 1.171370  |
| H | 5.968926 | 2.916623  | -0.964156 |
| H | 4.847985 | 2.260552  | -3.083355 |

|   |           |           |           |
|---|-----------|-----------|-----------|
| H | 2.482360  | 0.929350  | -3.998997 |
| H | 1.266712  | -1.409939 | -3.054097 |
| H | 3.407838  | -0.560561 | -3.789772 |
| S | 3.810883  | -3.037848 | -1.517003 |
| O | 3.844362  | -2.749982 | -2.957304 |
| O | 3.679990  | -4.416522 | -1.025359 |
| C | 5.264054  | -2.316237 | -0.768217 |
| C | 6.104769  | -1.508228 | -1.532194 |
| C | 5.487569  | -2.509474 | 0.597256  |
| C | 7.177037  | -0.873826 | -0.910290 |
| H | 5.907317  | -1.368403 | -2.587933 |
| C | 6.561245  | -1.863583 | 1.200870  |
| H | 4.830036  | -3.140121 | 1.185928  |
| C | 7.412602  | -1.028162 | 0.462425  |
| H | 7.828339  | -0.233518 | -1.497576 |
| H | 6.726228  | -1.993696 | 2.265248  |
| C | 8.524025  | -0.270458 | 1.143275  |
| H | 8.896209  | -0.804606 | 2.021675  |
| H | 9.362390  | -0.089572 | 0.465023  |
| H | 8.159970  | 0.707184  | 1.482831  |
| N | 2.462509  | -2.256947 | -0.895282 |
| H | 2.312682  | -2.567257 | 0.059465  |
| S | 0.210855  | 0.698225  | -2.539154 |
| C | -1.256447 | -0.245948 | -2.884814 |
| C | -2.036262 | 0.142806  | -3.996734 |
| C | -1.675855 | -1.287604 | -2.024521 |
| C | -3.228206 | -0.546256 | -4.239068 |
| C | -2.870724 | -1.959797 | -2.302155 |
| C | -3.636574 | -1.579211 | -3.398394 |
| H | -3.841007 | -0.262312 | -5.088490 |

|   |           |           |           |
|---|-----------|-----------|-----------|
| H | -3.229054 | -2.746147 | -1.655842 |
| H | -4.577182 | -2.088758 | -3.577668 |
| C | -1.622633 | 1.272126  | -4.911792 |
| H | -1.569381 | 2.225951  | -4.376179 |
| H | -0.634727 | 1.095364  | -5.349035 |
| H | -2.341295 | 1.384225  | -5.726517 |
| O | -0.879650 | -1.551161 | -0.957736 |
| C | -1.236427 | -2.619083 | -0.029994 |
| C | -0.506741 | -2.306536 | 1.262379  |
| C | -0.844170 | -3.968511 | -0.622359 |
| H | -2.310374 | -2.561504 | 0.168945  |
| H | -0.749514 | -1.298762 | 1.596098  |
| H | -0.821656 | -3.001661 | 2.042711  |
| H | 0.575593  | -2.398444 | 1.136826  |
| H | 0.231920  | -3.988280 | -0.819210 |
| H | -1.089522 | -4.768248 | 0.082675  |
| H | -1.368812 | -4.167302 | -1.559898 |
| H | 1.327433  | -0.666540 | -0.395443 |
| O | -5.017482 | -0.368569 | -0.604134 |
| S | -6.315780 | -1.016269 | -0.259941 |
| O | -7.360342 | -0.907308 | -1.296296 |
| O | -6.757114 | -0.755052 | 1.133023  |
| C | -5.881791 | -2.829313 | -0.251189 |
| F | -4.783552 | -3.052467 | 0.491280  |
| F | -6.887910 | -3.558323 | 0.252016  |
| F | -5.632275 | -3.267215 | -1.501795 |
| S | -0.149861 | 1.545829  | -0.126939 |
| C | 0.390558  | 3.168004  | -0.624196 |
| C | -0.553101 | 4.102581  | -1.077061 |
| C | 1.748722  | 3.512570  | -0.573191 |



|   |           |           |           |
|---|-----------|-----------|-----------|
| C | -0.134612 | 5.373879  | -1.459609 |
| H | -1.602948 | 3.832729  | -1.120461 |
| C | 2.151298  | 4.785900  | -0.966239 |
| H | 2.482896  | 2.788646  | -0.240863 |
| C | 1.221029  | 5.736119  | -1.413591 |
| H | -0.869673 | 6.096315  | -1.803338 |
| H | 3.206343  | 5.042153  | -0.928620 |
| C | 1.668954  | 7.102478  | -1.867996 |
| H | 0.902170  | 7.858553  | -1.677329 |
| H | 1.866686  | 7.103293  | -2.946899 |
| H | 2.590841  | 7.409146  | -1.366389 |
| C | 4.884597  | 0.085643  | 4.429177  |
| C | 3.674658  | 0.593269  | 3.943892  |
| C | 2.669215  | -0.267691 | 3.487570  |
| C | 2.905119  | -1.651988 | 3.532893  |
| C | 4.107225  | -2.160851 | 4.020433  |
| C | 5.104849  | -1.290507 | 4.471414  |
| H | 5.652642  | 0.771195  | 4.774902  |
| H | 3.529949  | 1.668463  | 3.920467  |
| H | 2.133423  | -2.333583 | 3.183335  |
| H | 4.267096  | -3.234813 | 4.047729  |
| H | 6.042900  | -1.683736 | 4.851588  |
| C | 1.354396  | 0.212686  | 2.906404  |
| C | 1.210317  | 1.731386  | 2.726097  |
| H | 1.230690  | -0.250198 | 1.923723  |
| H | 0.515641  | -0.148353 | 3.512507  |
| C | -0.066359 | 2.062170  | 2.073328  |
| H | 2.035560  | 2.128761  | 2.124817  |
| H | 1.231799  | 2.246419  | 3.693344  |
| C | -1.259410 | 2.379027  | 1.982670  |

|   |           |           |          |
|---|-----------|-----------|----------|
| C | -2.584524 | 2.804095  | 1.759598 |
| C | -2.866155 | 4.186870  | 1.709488 |
| C | -3.618829 | 1.866699  | 1.506932 |
| C | -4.147858 | 4.630254  | 1.409363 |
| H | -2.062942 | 4.891143  | 1.895053 |
| C | -4.900699 | 2.330492  | 1.203264 |
| C | -5.160790 | 3.700674  | 1.150697 |
| H | -4.357353 | 5.693775  | 1.369676 |
| H | -5.682281 | 1.605406  | 1.008506 |
| H | -6.163010 | 4.042647  | 0.913045 |
| S | -3.306791 | -0.373116 | 2.958932 |
| O | -2.270626 | 0.229185  | 3.810998 |
| O | -3.218631 | -1.788962 | 2.581749 |
| C | -4.907066 | -0.086482 | 3.728113 |
| H | -5.013436 | 0.982191  | 3.917564 |
| H | -4.913172 | -0.644998 | 4.665341 |
| H | -5.673127 | -0.443582 | 3.037371 |
| N | -3.335490 | 0.472295  | 1.493200 |
| H | -3.916267 | -0.031645 | 0.800768 |

Vibrational frequencies

|           |         |         |
|-----------|---------|---------|
| -208.7289 | 9.8040  | 16.3933 |
| 18.6298   | 22.6609 | 24.2708 |
| 28.7954   | 29.5248 | 31.0377 |
| 33.9400   | 37.4359 | 40.5844 |
| 42.0643   | 46.0261 | 50.9054 |
| 53.4056   | 55.4598 | 57.7727 |
| 58.6966   | 60.1578 | 65.2668 |
| 66.9986   | 73.2666 | 74.5162 |
| 77.6294   | 81.5287 | 84.8307 |
| 85.6501   | 88.4016 | 90.3500 |

**TS2S( $\Phi_1=57^\circ/\Phi_2=48^\circ$ )**

Cartesian coordinates

|   |           |          |           |
|---|-----------|----------|-----------|
| C | -0.756358 | 3.038347 | 1.603179  |
| C | 0.304950  | 2.174546 | 1.326416  |
| C | 1.588658  | 2.431019 | 1.807477  |
| C | 1.799035  | 3.583235 | 2.567656  |
| C | 0.740299  | 4.459213 | 2.837883  |
| C | -0.544863 | 4.192066 | 2.357210  |
| C | -2.031330 | 2.558000 | 0.955461  |
| C | -1.699329 | 1.121502 | 0.479394  |
| C | -0.147707 | 1.001673 | 0.479825  |
| H | 2.409901  | 1.763174 | 1.575091  |
| H | 2.793391  | 3.801604 | 2.945466  |
| H | 0.918236  | 5.353419 | 3.428231  |
| H | -1.364242 | 4.873844 | 2.566928  |
| H | -2.901084 | 2.595863 | 1.617474  |
| H | -2.125775 | 0.888766 | -0.487795 |
| H | -2.272548 | 3.179660 | 0.086671  |
| S | 0.052206  | 1.908041 | -2.177480 |
| O | -1.369690 | 1.706502 | -2.514240 |
| O | 1.082602  | 1.589228 | -3.179202 |
| C | 0.236663  | 3.608826 | -1.660703 |
| C | -0.851916 | 4.476594 | -1.736614 |
| C | 1.468767  | 4.026022 | -1.149819 |
| C | -0.710805 | 5.777654 | -1.254924 |
| H | -1.789931 | 4.131011 | -2.155920 |
| C | 1.586824  | 5.326076 | -0.674252 |
| H | 2.316312  | 3.350124 | -1.105749 |
| C | 0.499640  | 6.214323 | -0.701567 |
| H | -1.556880 | 6.457347 | -1.300076 |

|   |           |           |           |
|---|-----------|-----------|-----------|
| H | 2.535190  | 5.652202  | -0.257730 |
| C | 0.632822  | 7.593282  | -0.107107 |
| H | 1.587409  | 8.054328  | -0.378400 |
| H | -0.175437 | 8.254231  | -0.430446 |
| H | 0.601075  | 7.535773  | 0.987834  |
| N | 0.429609  | 0.916004  | -0.886656 |
| H | 1.449831  | 0.804324  | -0.850492 |
| S | -2.364183 | -0.138592 | 1.668889  |
| C | -4.126047 | 0.142230  | 1.703428  |
| C | -4.743237 | 0.133409  | 2.977085  |
| C | -4.892537 | 0.351118  | 0.527078  |
| C | -6.117317 | 0.377474  | 3.054314  |
| C | -6.264406 | 0.610053  | 0.647481  |
| C | -6.863101 | 0.623218  | 1.903320  |
| H | -6.600243 | 0.381431  | 4.026178  |
| H | -6.863837 | 0.775871  | -0.234807 |
| H | -7.928738 | 0.816720  | 1.979532  |
| C | -3.959290 | -0.122499 | 4.241892  |
| H | -3.484994 | -1.108409 | 4.228688  |
| H | -3.153989 | 0.607503  | 4.371682  |
| H | -4.614119 | -0.072059 | 5.114540  |
| O | -4.230302 | 0.244967  | -0.647096 |
| C | -4.642173 | 0.871122  | -1.901445 |
| C | -4.867357 | 2.371133  | -1.750883 |
| C | -5.787620 | 0.121077  | -2.580367 |
| H | -3.739231 | 0.723097  | -2.495922 |
| H | -3.983572 | 2.844313  | -1.317657 |
| H | -5.034551 | 2.804422  | -2.741421 |
| H | -5.733144 | 2.606492  | -1.127711 |
| H | -6.772397 | 0.391704  | -2.192356 |

|   |           |           |           |
|---|-----------|-----------|-----------|
| H | -5.779358 | 0.357170  | -3.648942 |
| H | -5.645804 | -0.955379 | -2.464959 |
| H | 0.177187  | 0.057300  | 0.925988  |
| O | 3.181497  | 0.569843  | -0.317327 |
| S | 4.484951  | 1.113415  | -0.835644 |
| O | 4.438098  | 2.540030  | -1.200649 |
| O | 5.159328  | 0.200726  | -1.783115 |
| C | 5.530897  | 1.039584  | 0.701686  |
| F | 5.654276  | -0.233787 | 1.108231  |
| F | 6.750900  | 1.537707  | 0.467246  |
| F | 4.958847  | 1.749393  | 1.688157  |
| S | -1.389350 | -2.306919 | 0.637643  |
| C | -2.252540 | -2.355930 | -0.905970 |
| C | -1.835511 | -1.520633 | -1.952307 |
| C | -3.317091 | -3.250862 | -1.111352 |
| C | -2.478158 | -1.578119 | -3.186120 |
| H | -1.008498 | -0.838804 | -1.799774 |
| C | -3.932741 | -3.314423 | -2.355249 |
| H | -3.641415 | -3.897364 | -0.302474 |
| C | -3.524082 | -2.479869 | -3.413081 |
| H | -2.144429 | -0.921745 | -3.983831 |
| H | -4.744009 | -4.019134 | -2.516370 |
| C | -4.218575 | -2.545344 | -4.749420 |
| H | -3.607775 | -2.102549 | -5.540334 |
| H | -5.167512 | -1.996860 | -4.718063 |
| H | -4.451108 | -3.577900 | -5.027042 |
| C | -0.859957 | -1.833502 | 4.949319  |
| C | -0.575418 | -3.080906 | 4.391825  |
| C | 0.416670  | -3.221544 | 3.410197  |
| C | 1.115392  | -2.078622 | 2.996291  |

|   |           |           |           |
|---|-----------|-----------|-----------|
| C | 0.827387  | -0.827896 | 3.548578  |
| C | -0.161280 | -0.700227 | 4.525115  |
| H | -1.620740 | -1.747656 | 5.719533  |
| H | -1.120119 | -3.959217 | 4.730697  |
| H | 1.893746  | -2.169497 | 2.248119  |
| H | 1.378494  | 0.047386  | 3.218609  |
| H | -0.384892 | 0.272992  | 4.951623  |
| C | 0.717900  | -4.581331 | 2.815005  |
| C | -0.279912 | -5.028348 | 1.712499  |
| H | 1.726492  | -4.596308 | 2.392372  |
| H | 0.680968  | -5.342715 | 3.602205  |
| C | -0.164016 | -4.204133 | 0.490265  |
| H | -1.304697 | -4.992269 | 2.092739  |
| H | -0.065140 | -6.065600 | 1.432078  |
| C | 0.421539  | -3.900153 | -0.562063 |
| C | 0.937304  | -3.327634 | -1.732817 |
| C | 0.329491  | -3.573414 | -2.983577 |
| C | 1.993026  | -2.377752 | -1.640785 |
| C | 0.724980  | -2.854479 | -4.103740 |
| H | -0.476197 | -4.296208 | -3.041281 |
| C | 2.362456  | -1.647593 | -2.769077 |
| C | 1.720242  | -1.878258 | -3.988148 |
| H | 0.241220  | -3.030959 | -5.058088 |
| H | 3.148180  | -0.905076 | -2.685902 |
| H | 2.010993  | -1.295687 | -4.855973 |
| S | 3.755793  | -3.259573 | 0.185247  |
| O | 3.216164  | -4.612159 | -0.011419 |
| O | 4.110713  | -2.795471 | 1.531050  |
| C | 5.182566  | -3.052678 | -0.892612 |
| H | 4.872648  | -3.288783 | -1.911369 |

|   |          |           |           |
|---|----------|-----------|-----------|
| H | 5.950647 | -3.747958 | -0.550910 |
| H | 5.517872 | -2.017371 | -0.822575 |
| N | 2.611271 | -2.153271 | -0.386317 |
| H | 2.949305 | -1.186664 | -0.257580 |

Vibrational frequencies

|           |         |         |
|-----------|---------|---------|
| -176.1713 | 15.7344 | 18.4209 |
| 25.5071   | 28.4895 | 30.1851 |
| 34.4282   | 36.0575 | 39.2145 |
| 43.1078   | 43.7118 | 46.0009 |
| 49.0406   | 51.6273 | 55.0484 |
| 58.1845   | 60.4066 | 61.9752 |
| 63.5926   | 67.0682 | 69.9935 |
| 71.2872   | 73.1668 | 74.5734 |
| 76.3745   | 79.5376 | 79.7606 |
| 84.2436   | 87.4892 | 89.8670 |

**TS2R( $\Phi_1=120^\circ/\Phi_2=-146^\circ$ )**

Cartesian coordinates

|   |           |           |          |
|---|-----------|-----------|----------|
| C | -2.589913 | -2.014047 | 2.558793 |
| C | -2.527062 | -1.089428 | 1.512069 |
| C | -3.146695 | 0.155436  | 1.612631 |
| C | -3.842977 | 0.463792  | 2.782067 |
| C | -3.912329 | -0.460219 | 3.832629 |
| C | -3.284193 | -1.704158 | 3.728640 |
| C | -1.859083 | -3.286408 | 2.204364 |
| C | -1.030838 | -2.889241 | 0.955812 |
| C | -1.729388 | -1.638626 | 0.343774 |
| H | -3.081076 | 0.866732  | 0.800204 |
| H | -4.335353 | 1.427283  | 2.876028 |
| H | -4.455795 | -0.206050 | 4.738227 |
| H | -3.334737 | -2.417235 | 4.546907 |

|   |           |           |           |
|---|-----------|-----------|-----------|
| H | -1.243105 | -3.674473 | 3.020241  |
| H | -0.927210 | -3.684154 | 0.222535  |
| H | -2.569934 | -4.067709 | 1.920891  |
| S | -3.895459 | -2.809169 | -0.946752 |
| O | -3.743908 | -3.994858 | -0.087176 |
| O | -4.177840 | -2.974920 | -2.381506 |
| C | -5.186346 | -1.776593 | -0.258045 |
| C | -5.792045 | -2.133084 | 0.944955  |
| C | -5.523702 | -0.592087 | -0.918700 |
| C | -6.749405 | -1.283383 | 1.495099  |
| H | -5.502849 | -3.049982 | 1.444104  |
| C | -6.479205 | 0.244004  | -0.350910 |
| H | -5.030867 | -0.310875 | -1.842850 |
| C | -7.099526 | -0.082233 | 0.864390  |
| H | -7.220446 | -1.551226 | 2.436496  |
| H | -6.726239 | 1.176104  | -0.849202 |
| C | -8.085302 | 0.865588  | 1.501115  |
| H | -8.790603 | 0.337944  | 2.149214  |
| H | -7.559649 | 1.603292  | 2.120011  |
| H | -8.653998 | 1.418600  | 0.748044  |
| N | -2.471493 | -1.946804 | -0.898159 |
| H | -2.579782 | -1.120804 | -1.503045 |
| S | 0.701173  | -2.458852 | 1.521092  |
| C | 1.749974  | -3.582120 | 0.614058  |
| C | 2.693074  | -4.353922 | 1.322244  |
| C | 1.697008  | -3.619922 | -0.802556 |
| C | 3.551741  | -5.187299 | 0.595627  |
| C | 2.541991  | -4.495076 | -1.497399 |
| C | 3.466026  | -5.262486 | -0.792820 |
| H | 4.280740  | -5.790267 | 1.127785  |



|   |           |           |           |
|---|-----------|-----------|-----------|
| H | 2.492154  | -4.572521 | -2.575163 |
| H | 4.125327  | -5.929578 | -1.339767 |
| C | 2.798180  | -4.295990 | 2.827983  |
| H | 3.078388  | -3.295039 | 3.173682  |
| H | 1.843237  | -4.539637 | 3.304125  |
| H | 3.551779  | -5.000040 | 3.187957  |
| O | 0.815093  | -2.772951 | -1.386746 |
| C | 0.714326  | -2.674643 | -2.834293 |
| C | 0.308655  | -1.241963 | -3.144640 |
| C | -0.289328 | -3.708272 | -3.331526 |
| H | 1.706215  | -2.858277 | -3.262325 |
| H | 1.061744  | -0.537177 | -2.784591 |
| H | 0.209170  | -1.118123 | -4.227034 |
| H | -0.648786 | -0.995065 | -2.685209 |
| H | -1.277334 | -3.491449 | -2.916090 |
| H | -0.351144 | -3.678314 | -4.423588 |
| H | 0.007135  | -4.717401 | -3.030692 |
| H | -0.989287 | -0.917366 | -0.007707 |
| S | 1.676478  | -0.326357 | 0.213929  |
| C | 1.526732  | 0.771660  | 1.604982  |
| C | 0.288882  | 1.397814  | 1.819028  |
| C | 2.612251  | 1.054332  | 2.445208  |
| C | 0.143037  | 2.293355  | 2.873481  |
| H | -0.534593 | 1.189969  | 1.148456  |
| C | 2.457798  | 1.975287  | 3.476983  |
| H | 3.573409  | 0.589310  | 2.264524  |
| C | 1.225459  | 2.607770  | 3.709814  |
| H | -0.821332 | 2.765168  | 3.039926  |
| H | 3.310093  | 2.211377  | 4.107686  |
| C | 1.074474  | 3.629633  | 4.807955  |

|   |           |          |           |
|---|-----------|----------|-----------|
| H | 0.079167  | 3.584817 | 5.259535  |
| H | 1.819972  | 3.488045 | 5.595018  |
| H | 1.204660  | 4.642870 | 4.408688  |
| O | -1.539389 | 1.844684 | -0.764742 |
| S | -2.257619 | 1.787644 | -2.062303 |
| O | -2.736115 | 0.423650 | -2.428125 |
| O | -1.648637 | 2.543442 | -3.171294 |
| C | -3.833239 | 2.721767 | -1.685869 |
| F | -3.594419 | 4.042285 | -1.657848 |
| F | -4.772244 | 2.474198 | -2.614244 |
| F | -4.331930 | 2.364044 | -0.488626 |
| C | 1.060836  | 7.132006 | -1.250866 |
| C | 1.856701  | 6.003533 | -1.033330 |
| C | 1.297994  | 4.815059 | -0.549119 |
| C | -0.081712 | 4.777627 | -0.289498 |
| C | -0.880349 | 5.897061 | -0.519831 |
| C | -0.311053 | 7.081184 | -0.997947 |
| H | 1.512707  | 8.046591 | -1.624710 |
| H | 2.922804  | 6.045876 | -1.242494 |
| H | -0.538212 | 3.858710 | 0.062548  |
| H | -1.949540 | 5.837250 | -0.337157 |
| H | -0.932438 | 7.953985 | -1.176833 |
| C | 2.146882  | 3.579800 | -0.335102 |
| C | 1.681522  | 2.437002 | -1.275241 |
| H | 2.057651  | 3.240636 | 0.700647  |
| H | 3.205271  | 3.790405 | -0.510431 |
| C | 2.450435  | 1.188750 | -1.090068 |
| H | 0.620723  | 2.241839 | -1.106959 |
| H | 1.796899  | 2.747407 | -2.319535 |
| C | 3.487727  | 0.511345 | -1.254196 |

|   |          |           |           |
|---|----------|-----------|-----------|
| C | 4.470899 | -0.471477 | -1.452464 |
| C | 4.398235 | -1.278475 | -2.611921 |
| C | 5.453889 | -0.758573 | -0.465616 |
| C | 5.255147 | -2.356714 | -2.777255 |
| H | 3.644394 | -1.048972 | -3.356577 |
| C | 6.297731 | -1.855051 | -0.642891 |
| C | 6.192738 | -2.653831 | -1.782754 |
| H | 5.182652 | -2.976275 | -3.663982 |
| H | 7.035856 | -2.085402 | 0.118810  |
| H | 6.854992 | -3.505405 | -1.897587 |
| S | 6.104980 | 1.602175  | 0.758815  |
| O | 5.469951 | 2.340890  | -0.333977 |
| O | 5.945669 | 2.018657  | 2.154049  |
| C | 7.857960 | 1.447603  | 0.376831  |
| H | 7.953481 | 0.962953  | -0.595624 |
| H | 8.267701 | 2.458318  | 0.344146  |
| H | 8.336272 | 0.860981  | 1.161221  |
| N | 5.504614 | 0.001164  | 0.728759  |
| H | 5.876054 | -0.505195 | 1.529345  |

Vibrational frequencies

|           |         |         |
|-----------|---------|---------|
| -191.8122 | 11.5047 | 13.3359 |
| 15.8768   | 19.4220 | 20.3247 |
| 24.6224   | 26.7939 | 28.0213 |
| 30.3060   | 33.0004 | 34.6476 |
| 37.1843   | 40.5958 | 42.2211 |
| 43.2079   | 47.1361 | 48.9504 |
| 50.6511   | 52.5179 | 55.3814 |
| 59.3152   | 62.5235 | 66.9698 |
| 70.1230   | 74.1944 | 75.6570 |
| 79.7473   | 81.7560 | 85.4945 |

**TS2R( $\Phi_1=66^\circ/\Phi_2=-165^\circ$ )**

Cartesian coordinates

|   |           |           |           |
|---|-----------|-----------|-----------|
| C | 1.015241  | -2.956317 | -2.372463 |
| C | 1.238022  | -1.914689 | -1.470320 |
| C | 2.211274  | -0.947013 | -1.702289 |
| C | 2.976514  | -1.032260 | -2.864525 |
| C | 2.756047  | -2.071812 | -3.777820 |
| C | 1.776702  | -3.040610 | -3.538797 |
| C | -0.065286 | -3.886692 | -1.872092 |
| C | -0.712125 | -3.104568 | -0.702639 |
| C | 0.292813  | -1.990671 | -0.292575 |
| H | 2.382321  | -0.161993 | -0.978708 |
| H | 3.749580  | -0.294163 | -3.049048 |
| H | 3.356173  | -2.128130 | -4.681383 |
| H | 1.613712  | -3.845815 | -4.249616 |
| H | -0.782770 | -4.177382 | -2.645004 |
| H | -0.970414 | -3.722949 | 0.147205  |
| H | 0.373734  | -4.805395 | -1.468532 |
| S | 1.979914  | -3.388838 | 1.409338  |
| O | 1.478460  | -4.634893 | 0.806388  |
| O | 2.164748  | -3.277364 | 2.865049  |
| C | 3.518920  | -2.956046 | 0.615566  |
| C | 3.958759  | -3.675197 | -0.492892 |
| C | 4.204643  | -1.822836 | 1.065482  |
| C | 5.100345  | -3.239347 | -1.165110 |
| H | 3.402907  | -4.539656 | -0.835354 |
| C | 5.333376  | -1.396506 | 0.378081  |
| H | 3.855153  | -1.273554 | 1.932069  |
| C | 5.791540  | -2.093685 | -0.752551 |
| H | 5.440927  | -3.785492 | -2.039734 |

|   |           |           |           |
|---|-----------|-----------|-----------|
| H | 5.839630  | -0.494889 | 0.707010  |
| C | 6.998530  | -1.589559 | -1.502343 |
| H | 7.907750  | -1.700490 | -0.900447 |
| H | 7.147132  | -2.129346 | -2.441031 |
| H | 6.889876  | -0.523954 | -1.725954 |
| N | 0.860919  | -2.203879 | 1.048919  |
| H | 1.057738  | -1.347261 | 1.562758  |
| S | -2.296161 | -2.299469 | -1.275000 |
| C | -3.562198 | -3.449942 | -0.780261 |
| C | -4.492603 | -3.876648 | -1.753280 |
| C | -3.656391 | -3.888879 | 0.563955  |
| C | -5.487590 | -4.778620 | -1.364121 |
| C | -4.652542 | -4.809091 | 0.913228  |
| C | -5.557304 | -5.242852 | -0.051443 |
| H | -6.206024 | -5.124355 | -2.100236 |
| H | -4.728594 | -5.175095 | 1.928691  |
| H | -6.330614 | -5.951094 | 0.229523  |
| C | -4.430757 | -3.396205 | -3.184181 |
| H | -4.538376 | -2.308315 | -3.249353 |
| H | -3.474571 | -3.651566 | -3.651777 |
| H | -5.229910 | -3.849556 | -3.774151 |
| O | -2.768374 | -3.356628 | 1.440064  |
| C | -2.502326 | -3.999202 | 2.722516  |
| C | -1.715726 | -2.975958 | 3.526024  |
| C | -1.738450 | -5.302155 | 2.508606  |
| H | -3.459442 | -4.190352 | 3.221241  |
| H | -2.313385 | -2.074602 | 3.681862  |
| H | -1.459552 | -3.392220 | 4.504129  |
| H | -0.793072 | -2.710423 | 3.003973  |
| H | -0.761855 | -5.105589 | 2.055989  |

|   |           |           |           |
|---|-----------|-----------|-----------|
| H | -1.578298 | -5.795725 | 3.471587  |
| H | -2.294152 | -5.988268 | 1.863816  |
| H | -0.215488 | -1.039181 | -0.167724 |
| S | -2.844213 | -0.205885 | 0.136276  |
| C | -1.775086 | 0.818587  | -0.857817 |
| C | -0.594891 | 1.333279  | -0.302240 |
| C | -2.104792 | 1.119981  | -2.185748 |
| C | 0.240574  | 2.136433  | -1.063393 |
| H | -0.344767 | 1.125766  | 0.730257  |
| C | -1.238803 | 1.901666  | -2.952560 |
| H | -3.023824 | 0.737096  | -2.616852 |
| C | -0.053985 | 2.419805  | -2.407037 |
| H | 1.138786  | 2.538437  | -0.612921 |
| H | -1.488555 | 2.111046  | -3.988771 |
| C | 0.885143  | 3.276721  | -3.218074 |
| H | 0.705365  | 4.340543  | -3.020345 |
| H | 1.926110  | 3.075659  | -2.950024 |
| H | 0.758554  | 3.111648  | -4.291073 |
| O | 4.705503  | 3.992525  | 1.026456  |
| S | 5.507998  | 2.848808  | 0.533515  |
| O | 5.605181  | 1.701841  | 1.472452  |
| O | 6.763367  | 3.198750  | -0.166051 |
| C | 4.438986  | 2.169294  | -0.831499 |
| F | 4.174485  | 3.096586  | -1.769005 |
| F | 5.013507  | 1.115468  | -1.444611 |
| F | 3.257302  | 1.752481  | -0.325048 |
| C | 1.585998  | 0.216059  | 3.231684  |
| C | 0.252571  | 0.452662  | 3.578807  |
| C | -0.358242 | 1.684860  | 3.298117  |
| C | 0.402059  | 2.675106  | 2.660432  |

|   |           |           |           |
|---|-----------|-----------|-----------|
| C | 1.731699  | 2.437526  | 2.298008  |
| C | 2.329672  | 1.207589  | 2.580765  |
| H | 2.042601  | -0.735851 | 3.493797  |
| H | -0.308914 | -0.324799 | 4.090744  |
| H | -0.053493 | 3.630693  | 2.422898  |
| H | 2.311860  | 3.207505  | 1.797941  |
| H | 3.366709  | 1.044240  | 2.304385  |
| C | -1.789706 | 1.947215  | 3.721397  |
| C | -2.842546 | 0.981017  | 3.114751  |
| H | -2.072960 | 2.976401  | 3.488336  |
| H | -1.859983 | 1.830080  | 4.809412  |
| C | -3.294058 | 1.337080  | 1.752805  |
| H | -2.461575 | -0.041871 | 3.113766  |
| H | -3.739209 | 0.985382  | 3.744968  |
| C | -3.899700 | 2.034550  | 0.927046  |
| C | -4.559012 | 2.719131  | -0.113700 |
| C | -5.900293 | 2.402002  | -0.420103 |
| C | -3.872467 | 3.674594  | -0.907601 |
| C | -6.532733 | 2.994915  | -1.504912 |
| H | -6.418049 | 1.672716  | 0.192865  |
| C | -4.521733 | 4.259193  | -1.995354 |
| C | -5.839312 | 3.914810  | -2.299230 |
| H | -7.560358 | 2.738478  | -1.738268 |
| H | -3.988083 | 4.983655  | -2.601798 |
| H | -6.329233 | 4.375213  | -3.150888 |
| S | -2.131026 | 5.091862  | 0.612848  |
| O | -2.865461 | 4.691572  | 1.817976  |
| O | -0.666625 | 5.159667  | 0.607615  |
| C | -2.791146 | 6.678776  | 0.074967  |
| H | -3.866004 | 6.569813  | -0.074583 |

|   |           |          |           |
|---|-----------|----------|-----------|
| H | -2.585249 | 7.399482 | 0.867728  |
| H | -2.291277 | 6.966447 | -0.850369 |
| N | -2.523430 | 3.993937 | -0.605629 |
| H | -1.892961 | 4.077486 | -1.398916 |

Vibrational frequencies

|           |         |         |
|-----------|---------|---------|
| -188.5407 | 14.4684 | 18.0015 |
| 19.8756   | 24.2913 | 27.0591 |
| 29.1874   | 30.2096 | 35.1719 |
| 41.1083   | 42.5001 | 45.7860 |
| 49.7121   | 50.5291 | 52.2844 |
| 54.8724   | 57.7271 | 58.1493 |
| 64.0166   | 66.4732 | 69.4478 |
| 70.5710   | 72.0698 | 75.5515 |
| 76.3333   | 79.0571 | 83.0262 |
| 87.6870   | 88.9001 | 93.4161 |

**TS2R( $\Phi$ 1=-84°/ $\Phi$ 2=-35°)**

Cartesian coordinates

|   |           |          |           |
|---|-----------|----------|-----------|
| C | -0.445043 | 1.414548 | -2.054635 |
| C | 0.314833  | 1.758768 | -0.932759 |
| C | -0.258245 | 2.442194 | 0.138578  |
| C | -1.619382 | 2.744293 | 0.091392  |
| C | -2.389054 | 2.367985 | -1.015166 |
| C | -1.806891 | 1.707109 | -2.099476 |
| C | 0.420463  | 0.775227 | -3.114686 |
| C | 1.696421  | 0.368117 | -2.336021 |
| C | 1.747608  | 1.286916 | -1.078279 |
| H | 0.339614  | 2.748127 | 0.990713  |
| H | -2.088569 | 3.244534 | 0.930082  |
| H | -3.453148 | 2.571689 | -1.032699 |
| H | -2.419691 | 1.415747 | -2.945283 |



|   |           |           |           |
|---|-----------|-----------|-----------|
| H | -0.058623 | -0.063275 | -3.626461 |
| H | 2.615995  | 0.423779  | -2.915988 |
| H | 0.700295  | 1.510104  | -3.875778 |
| S | 2.773173  | 3.622817  | -2.239303 |
| O | 2.495519  | 3.073356  | -3.573658 |
| O | 4.032347  | 4.327965  | -1.958670 |
| C | 1.421485  | 4.695997  | -1.779372 |
| C | 0.237497  | 4.671366  | -2.516006 |
| C | 1.541353  | 5.471731  | -0.623889 |
| C | -0.847792 | 5.419062  | -2.069923 |
| H | 0.166115  | 4.063790  | -3.409487 |
| C | 0.444282  | 6.212534  | -0.193976 |
| H | 2.475156  | 5.496759  | -0.072058 |
| C | -0.768524 | 6.185274  | -0.898739 |
| H | -1.777564 | 5.390672  | -2.629535 |
| H | 0.527781  | 6.814340  | 0.706233  |
| C | -1.978064 | 6.925338  | -0.387209 |
| H | -2.582960 | 7.320063  | -1.208534 |
| H | -2.617564 | 6.246417  | 0.190148  |
| H | -1.698192 | 7.754044  | 0.268445  |
| N | 2.799728  | 2.322023  | -1.178135 |
| H | 3.143807  | 2.641166  | -0.278692 |
| S | 1.477335  | -1.437330 | -1.903892 |
| C | 3.054196  | -2.229214 | -2.095102 |
| C | 3.092830  | -3.397265 | -2.892013 |
| C | 4.205314  | -1.779380 | -1.404314 |
| C | 4.312097  | -4.067621 | -3.021746 |
| C | 5.417546  | -2.459055 | -1.581955 |
| C | 5.457421  | -3.594986 | -2.384423 |
| H | 4.362350  | -4.960758 | -3.635706 |

|   |           |           |           |
|---|-----------|-----------|-----------|
| H | 6.321062  | -2.119191 | -1.095016 |
| H | 6.399637  | -4.119643 | -2.508985 |
| C | 1.867525  | -3.937756 | -3.589899 |
| H | 1.105207  | -4.246035 | -2.867254 |
| H | 1.409568  | -3.189491 | -4.243482 |
| H | 2.129116  | -4.808157 | -4.195043 |
| O | 4.036148  | -0.718999 | -0.578781 |
| C | 5.160314  | -0.200413 | 0.188172  |
| C | 4.561949  | 0.463474  | 1.417902  |
| C | 5.980651  | 0.748419  | -0.678187 |
| H | 5.770436  | -1.047296 | 0.520948  |
| H | 3.994654  | -0.254916 | 2.014171  |
| H | 5.356132  | 0.880923  | 2.041891  |
| H | 3.892377  | 1.277399  | 1.137907  |
| H | 5.362575  | 1.588953  | -1.003731 |
| H | 6.832669  | 1.131028  | -0.108803 |
| H | 6.362833  | 0.239445  | -1.566676 |
| H | 2.066438  | 0.707165  | -0.212351 |
| S | 0.780098  | -1.609052 | 0.518766  |
| C | 1.538687  | -3.210521 | 0.589779  |
| C | 0.850273  | -4.324934 | 0.070502  |
| C | 2.839912  | -3.360029 | 1.091055  |
| C | 1.476284  | -5.568005 | 0.052623  |
| H | -0.153556 | -4.208288 | -0.323341 |
| C | 3.450368  | -4.609641 | 1.063042  |
| H | 3.370571  | -2.492263 | 1.454235  |
| C | 2.779151  | -5.730788 | 0.538854  |
| H | 0.950832  | -6.423523 | -0.362140 |
| H | 4.463369  | -4.714100 | 1.440568  |
| C | 3.465694  | -7.082857 | 0.544091  |

|   |           |           |           |
|---|-----------|-----------|-----------|
| H | 2.727481  | -7.909798 | 0.008684  |
| H | 4.534494  | -6.970895 | -0.054739 |
| H | 3.685557  | -7.406723 | 1.731144  |
| O | -4.953970 | 0.322269  | -0.265229 |
| S | -4.920205 | -0.026383 | -1.720705 |
| O | -3.904024 | -1.040491 | -2.071263 |
| O | -5.035023 | 1.131957  | -2.631340 |
| C | -6.541605 | -0.919652 | -1.945584 |
| F | -7.571518 | -0.131826 | -1.601191 |
| F | -6.701412 | -1.293188 | -3.224490 |
| F | -6.589156 | -2.028661 | -1.178517 |
| C | 2.153975  | 2.832203  | 6.160645  |
| C | 1.408554  | 1.913739  | 5.421368  |
| C | 1.547951  | 1.829725  | 4.027829  |
| C | 2.444412  | 2.700494  | 3.396098  |
| C | 3.191377  | 3.624472  | 4.130532  |
| C | 3.050909  | 3.690138  | 5.517367  |
| H | 2.031286  | 2.882748  | 7.238664  |
| H | 0.704098  | 1.259943  | 5.929342  |
| H | 2.554387  | 2.662332  | 2.316695  |
| H | 3.879651  | 4.290772  | 3.618645  |
| H | 3.629932  | 4.406318  | 6.092612  |
| C | 0.737911  | 0.833182  | 3.231127  |
| C | 1.064174  | -0.638296 | 3.586036  |
| H | 0.919047  | 0.971920  | 2.163314  |
| H | -0.333235 | 0.998266  | 3.388924  |
| C | 0.211141  | -1.544166 | 2.804711  |
| H | 2.122366  | -0.849059 | 3.403963  |
| H | 0.873506  | -0.827620 | 4.648383  |
| C | -0.802721 | -2.183576 | 2.509052  |

|   |           |           |          |
|---|-----------|-----------|----------|
| C | -1.937447 | -2.856482 | 2.012438 |
| C | -1.997324 | -4.264519 | 1.989659 |
| C | -2.996484 | -2.096719 | 1.448897 |
| C | -3.074495 | -4.907425 | 1.390798 |
| H | -1.181183 | -4.831440 | 2.423301 |
| C | -4.069969 | -2.757273 | 0.850732 |
| C | -4.101412 | -4.152095 | 0.814164 |
| H | -3.112651 | -5.991239 | 1.365835 |
| H | -4.869461 | -2.174327 | 0.413549 |
| H | -4.941348 | -4.649961 | 0.340026 |
| S | -3.296624 | 0.142259  | 2.889169 |
| O | -2.768516 | -0.641618 | 4.014016 |
| O | -2.864164 | 1.532739  | 2.708306 |
| C | -5.096367 | 0.104897  | 2.959984 |
| H | -5.407437 | -0.939445 | 3.011990 |
| H | -5.400896 | 0.644981  | 3.857445 |
| H | -5.478917 | 0.577136  | 2.055014 |
| N | -2.914842 | -0.678531 | 1.450887 |
| H | -3.450234 | -0.246097 | 0.681225 |

Vibrational frequencies

|           |         |         |
|-----------|---------|---------|
| -174.1153 | 12.9483 | 15.2566 |
| 18.7959   | 22.6828 | 24.7153 |
| 26.9821   | 28.1229 | 29.2590 |
| 31.1626   | 38.5133 | 38.6616 |
| 42.5370   | 45.2671 | 46.0312 |
| 47.0444   | 50.8314 | 51.6202 |
| 55.1077   | 56.7270 | 62.9360 |
| 64.6737   | 64.8896 | 69.3118 |
| 71.8817   | 74.0077 | 75.7715 |
| 80.5936   | 91.5588 | 91.9524 |

**TS2R( $\Phi_1=-102^\circ/\Phi_2=106^\circ$ )**

Cartesian coordinates

|   |          |           |           |
|---|----------|-----------|-----------|
| C | 3.499396 | 0.605795  | -2.386511 |
| C | 3.812066 | 0.661264  | -1.025110 |
| C | 4.621631 | 1.673860  | -0.514673 |
| C | 5.109151 | 2.648394  | -1.387548 |
| C | 4.782029 | 2.606548  | -2.749196 |
| C | 3.977871 | 1.583132  | -3.258433 |
| C | 2.665009 | -0.613912 | -2.697222 |
| C | 2.158259 | -1.064281 | -1.306974 |
| C | 3.149575 | -0.471619 | -0.264971 |
| H | 4.870067 | 1.701220  | 0.541052  |
| H | 5.742389 | 3.445117  | -1.009459 |
| H | 5.160543 | 3.375460  | -3.415972 |
| H | 3.733807 | 1.548360  | -4.316209 |
| H | 1.857098 | -0.422274 | -3.407965 |
| H | 2.045722 | -2.137943 | -1.201691 |
| H | 3.289655 | -1.411736 | -3.113884 |
| S | 5.213181 | -2.346573 | -0.432313 |
| O | 4.582371 | -2.895866 | -1.641755 |
| O | 5.771300 | -3.233241 | 0.598478  |
| C | 6.492341 | -1.206142 | -0.936002 |
| C | 6.557587 | -0.783323 | -2.263432 |
| C | 7.351825 | -0.685659 | 0.034079  |
| C | 7.486268 | 0.191494  | -2.614653 |
| H | 5.883678 | -1.203994 | -2.999400 |
| C | 8.273295 | 0.289731  | -0.336590 |
| H | 7.302259 | -1.038478 | 1.058936  |
| C | 8.344905 | 0.752837  | -1.659011 |
| H | 7.534304 | 0.532856  | -3.644261 |

|   |           |           |           |
|---|-----------|-----------|-----------|
| H | 8.944145  | 0.700824  | 0.412151  |
| C | 9.294157  | 1.859050  | -2.043691 |
| H | 9.711721  | 1.698219  | -3.041817 |
| H | 8.765450  | 2.819972  | -2.063972 |
| H | 10.119664 | 1.950083  | -1.333048 |
| N | 4.026556  | -1.479060 | 0.367730  |
| H | 4.354224  | -1.201691 | 1.288458  |
| S | 0.454983  | -0.323996 | -1.062356 |
| C | -0.609776 | -1.714561 | -0.739055 |
| C | -1.828748 | -1.781889 | -1.449055 |
| C | -0.283258 | -2.670542 | 0.254192  |
| C | -2.686056 | -2.856838 | -1.187578 |
| C | -1.157035 | -3.738769 | 0.479381  |
| C | -2.345597 | -3.821555 | -0.242648 |
| H | -3.621713 | -2.927141 | -1.730312 |
| H | -0.929433 | -4.482641 | 1.227117  |
| H | -3.021963 | -4.649007 | -0.051120 |
| C | -2.228654 | -0.736328 | -2.463006 |
| H | -2.372855 | 0.238713  | -1.985775 |
| H | -1.461061 | -0.610232 | -3.233233 |
| H | -3.171500 | -1.009577 | -2.935975 |
| O | 0.860833  | -2.431612 | 0.946198  |
| C | 1.631764  | -3.449764 | 1.653298  |
| C | 2.063611  | -4.575597 | 0.721514  |
| C | 0.974815  | -3.924312 | 2.952008  |
| H | 2.518437  | -2.870892 | 1.916469  |
| H | 2.608679  | -4.174086 | -0.136254 |
| H | 2.734431  | -5.250017 | 1.261963  |
| H | 1.212651  | -5.159374 | 0.361747  |
| H | 0.234053  | -4.711979 | 2.800608  |

|   |           |           |           |
|---|-----------|-----------|-----------|
| H | 1.752608  | -4.330656 | 3.605762  |
| H | 0.491026  | -3.095062 | 3.474264  |
| H | 2.601092  | -0.092680 | 0.590710  |
| S | -0.179064 | 1.058856  | 0.996456  |
| C | 1.201669  | 0.947261  | 2.094435  |
| C | 1.355668  | -0.160400 | 2.945402  |
| C | 2.183307  | 1.953136  | 2.079885  |
| C | 2.494244  | -0.276826 | 3.733973  |
| H | 0.599649  | -0.933890 | 2.942806  |
| C | 3.313151  | 1.830321  | 2.884657  |
| H | 2.073397  | 2.794733  | 1.404852  |
| C | 3.495370  | 0.711195  | 3.712361  |
| H | 2.617061  | -1.147539 | 4.372120  |
| H | 4.074380  | 2.604872  | 2.859180  |
| C | 4.723196  | 0.578143  | 4.576082  |
| H | 5.029055  | -0.467303 | 4.674876  |
| H | 5.562533  | 1.149952  | 4.171596  |
| H | 4.523877  | 0.955243  | 5.586434  |
| O | -5.307494 | 0.075801  | -1.589554 |
| S | -6.036916 | -1.204971 | -1.835186 |
| O | -6.357198 | -1.965954 | -0.605176 |
| O | -5.516267 | -2.001209 | -2.967409 |
| C | -7.697105 | -0.610589 | -2.437049 |
| F | -7.561718 | 0.121634  | -3.551466 |
| F | -8.500813 | -1.650552 | -2.703381 |
| F | -8.293339 | 0.152138  | -1.500079 |
| C | 1.284263  | 3.871794  | -1.374147 |
| C | 0.599513  | 4.411623  | -0.284310 |
| C | -0.772489 | 4.180514  | -0.109988 |
| C | -1.459095 | 3.436171  | -1.077095 |

|   |           |           |           |
|---|-----------|-----------|-----------|
| C | -0.779595 | 2.909188  | -2.178201 |
| C | 0.594295  | 3.111848  | -2.322736 |
| H | 2.353701  | 4.029552  | -1.482157 |
| H | 1.140321  | 5.002732  | 0.452029  |
| H | -2.520416 | 3.244611  | -0.946783 |
| H | -1.322510 | 2.323654  | -2.914195 |
| H | 1.130209  | 2.680113  | -3.162357 |
| C | -1.474438 | 4.657622  | 1.142700  |
| C | -1.019417 | 3.904083  | 2.422247  |
| H | -2.557140 | 4.548275  | 1.035631  |
| H | -1.264647 | 5.719718  | 1.314187  |
| C | -1.403864 | 2.486815  | 2.448029  |
| H | 0.067458  | 3.983139  | 2.540339  |
| H | -1.472334 | 4.377489  | 3.301584  |
| C | -2.037726 | 1.460961  | 2.722631  |
| C | -2.686453 | 0.211426  | 2.816675  |
| C | -2.294243 | -0.731086 | 3.788950  |
| C | -3.631406 | -0.156205 | 1.820547  |
| C | -2.794765 | -2.026009 | 3.749047  |
| H | -1.573157 | -0.436030 | 4.543513  |
| C | -4.129319 | -1.460659 | 1.795908  |
| C | -3.698187 | -2.389509 | 2.743260  |
| H | -2.476960 | -2.753629 | 4.488240  |
| H | -4.838570 | -1.743527 | 1.024436  |
| H | -4.082380 | -3.403596 | 2.701847  |
| S | -4.945500 | 2.123688  | 1.175850  |
| O | -4.685717 | 2.513767  | 2.568061  |
| O | -4.725508 | 3.092122  | 0.093500  |
| C | -6.634861 | 1.516229  | 1.062211  |
| H | -6.742170 | 0.687364  | 1.763100  |



|   |           |          |           |
|---|-----------|----------|-----------|
| H | -7.294078 | 2.342088 | 1.333927  |
| H | -6.806496 | 1.188225 | 0.038799  |
| N | -3.982492 | 0.771740 | 0.811452  |
| H | -4.329951 | 0.357761 | -0.068331 |

Vibrational frequencies

|           |         |         |
|-----------|---------|---------|
| -181.5759 | 12.2332 | 17.0026 |
| 18.8393   | 23.1791 | 25.5531 |
| 30.3302   | 32.2282 | 33.5488 |
| 34.6354   | 38.5638 | 40.7511 |
| 42.6628   | 45.0851 | 48.0989 |
| 49.7859   | 52.1604 | 53.8359 |
| 54.5414   | 56.3127 | 59.0303 |
| 60.4144   | 65.0728 | 65.3855 |
| 67.4175   | 68.0198 | 71.2922 |
| 75.5379   | 81.9003 | 82.4340 |
